# Supplementary material for: 5,7-Bis(2′-arylethenyl)-6H-1,4-diazepine-2,3-dicarbonitriles: synthesis, and experimental and theoretical evaluation of the effects of substituents at 5,6,7-positions on the molecular configuration and spectral properties
Source: Royal Society of Chemistry journal article supplement (doi:10.1039/c5ob02098k), 2015-11-25
Supplement: c5ob02098k1.pdf [file c5ob02098k1.pdf]

## Supporting Information

### **5,7-Bis(2'-arylethenyl)-6H-1,4-diazepine-2,3-dicarbonitriles: synthesis, experimental and theoretical evaluation of effect of substituents at 5,6,7-positions on the molecular configuration and spectral properties**

Pavel A. Tarakanov,<sup>a</sup> Anton O. Simakov,<sup>b</sup> Alexander V. Dzuban,<sup>c</sup> Vladimir I. Shestov,<sup>a</sup>  
Ekaterina N. Tarakanova,<sup>a</sup> Victor E. Pushkarev<sup>a</sup> and Larisa G. Tomilova<sup>a,c</sup>

<sup>a</sup> Institute of Physiologically Active Compounds, Russian Academy of Sciences, 1 Severny proezd, 142432 Chernogolovka, Russian Federation

<sup>b</sup> Centre for Theoretical and Computational Chemistry (CTCC), Department of Chemistry, University of Oslo, P. O. Box 1033 Blindern, N-0315 Oslo, Norway

<sup>c</sup> Department of Chemistry, M.V. Lomonosov Moscow State University, 1 Leninskie Gory, 119991 Moscow, Russian Federation

Fax: +7 49652 49508; E-mail: paveltar369@gmail.com

#### Table of Contents

|                                                                                                    |     |
|----------------------------------------------------------------------------------------------------|-----|
| ESI mass spectra of <b>5a-c</b> , <b>6b,d</b>                                                      | S2  |
| <sup>1</sup> H, <sup>13</sup> C NMR spectra of <b>5a-c</b> , <b>6b,d</b>                           | S5  |
| <sup>1</sup> H- <sup>13</sup> C HSQC and <sup>1</sup> H- <sup>13</sup> C HMBC spectra of <b>6d</b> | S11 |
| NMR data analysis for <b>6d</b>                                                                    | S12 |
| <sup>1</sup> H- <sup>1</sup> H COSY spectrum of <b>6b</b>                                          | S13 |
| <sup>1</sup> H- <sup>1</sup> H NOESY spectrum of <b>6b</b>                                         | S13 |
| IR spectra of <b>5a-c</b> , <b>6b,d</b>                                                            | S14 |
| Fluorescence data                                                                                  | S17 |
| Thermogravimetric analysis                                                                         | S18 |
| Full Computational Details                                                                         | S20 |

==== Shimadzu LabSolutions Data Report ====

<Spectrum>

Line#:1 R.Time:0.667(Scan#:81)  
MassPpeaks:301  
RawMode:Single 0.667(81) BasePeak:213(2002255)  
BG Mode:None Segment 1 - Event 1

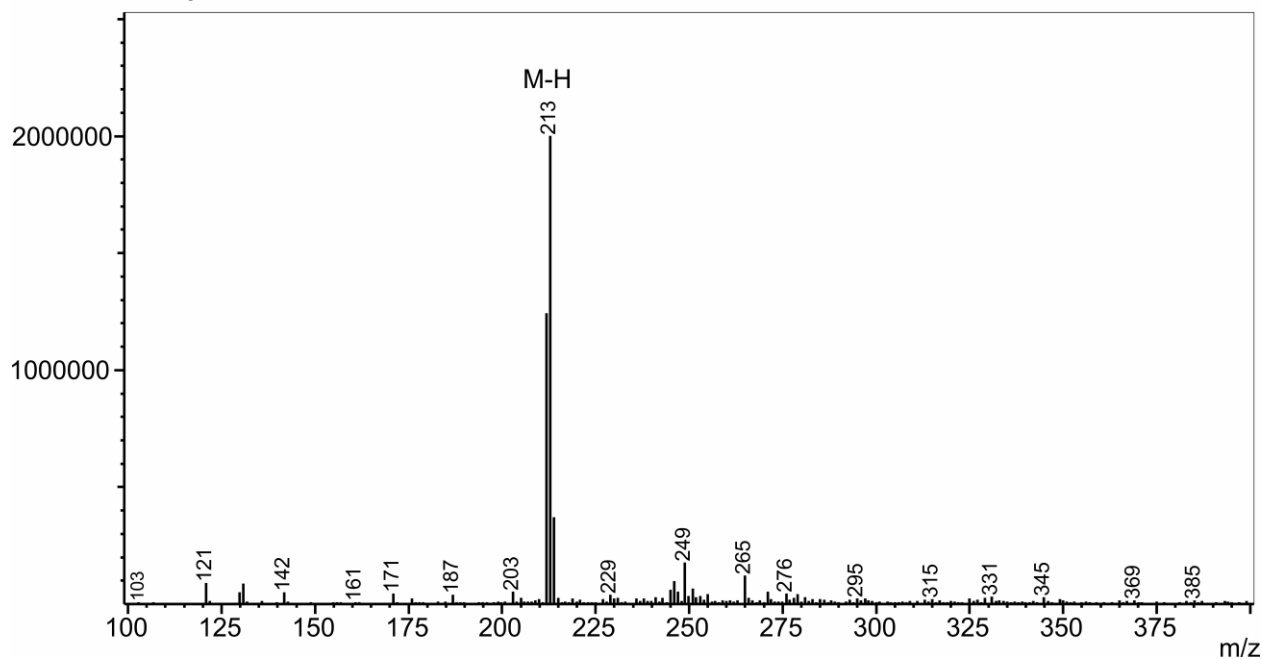

Fig. S1 ESI mass spectrum of 4.

==== Shimadzu LabSolutions Data Report ====

<Spectrum>

Line#:1 R.Time:1.040(Scan#:209)  
MassPpeaks:249  
RawMode:Single 1.040(209) BasePeak:349(688925)  
BG Mode:None Segment 1 - Event 1

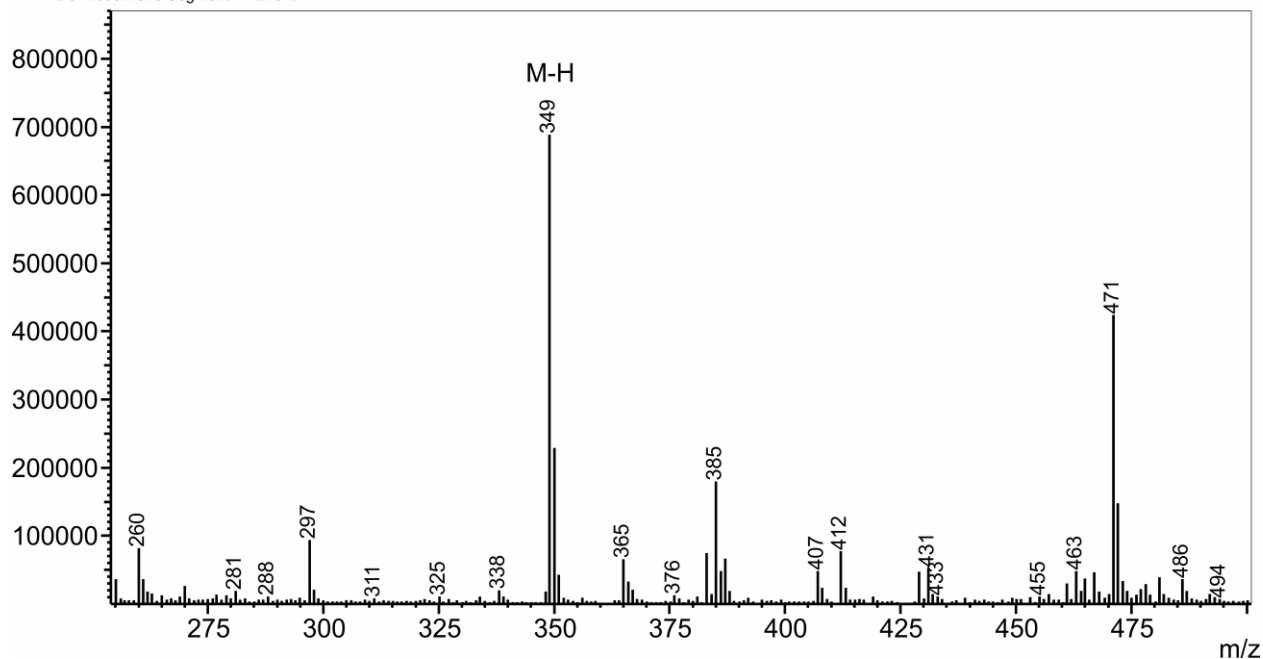

Fig. S2 ESI mass spectrum of 5a.

==== Shimadzu LabSolutions Data Report ====

<Spectrum>

Line#:1 R.Time:0,720(Scan#:145)  
MassPpeaks:635  
RawMode:Single 0,720(145) BasePeak:648(369225)  
BG Mode:None Segment 1 - Event 1

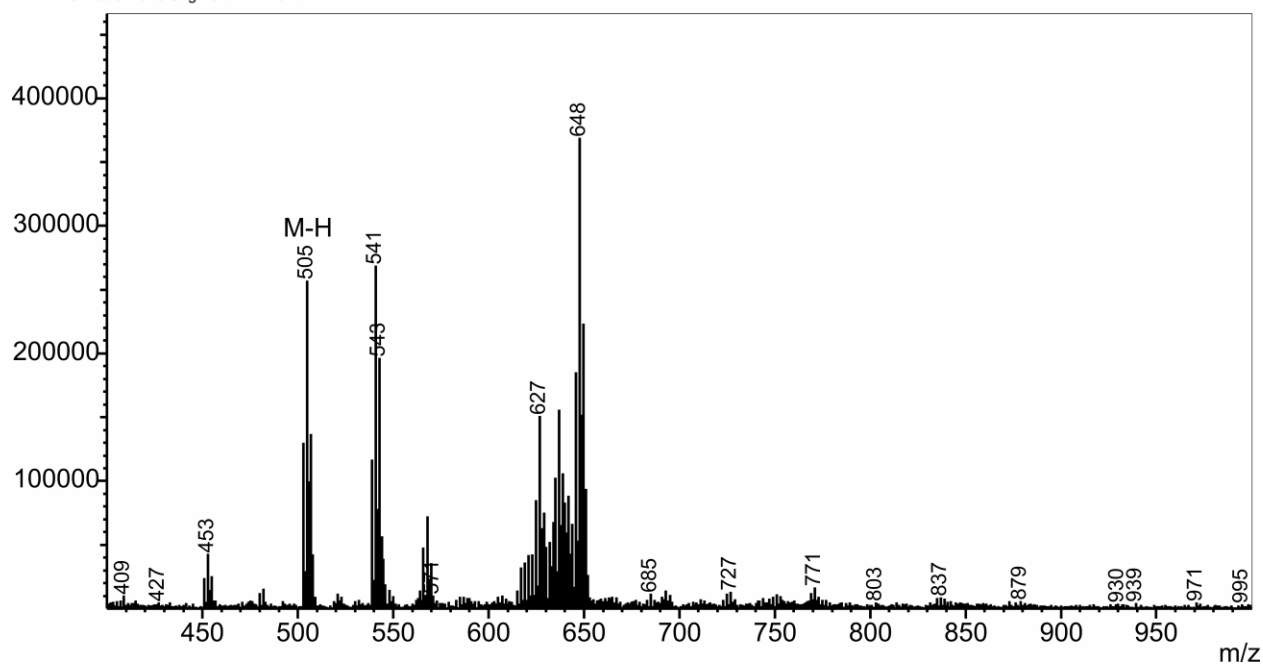

Fig. S3 ESI mass spectrum of 5b.

==== Shimadzu LabSolutions Data Report ====

<Spectrum>

Line#:1 R.Time:0,640(Scan#:129)  
MassPpeaks:322  
RawMode:Single 0,640(129) BasePeak:559(197325)  
BG Mode:None Segment 1 - Event 1

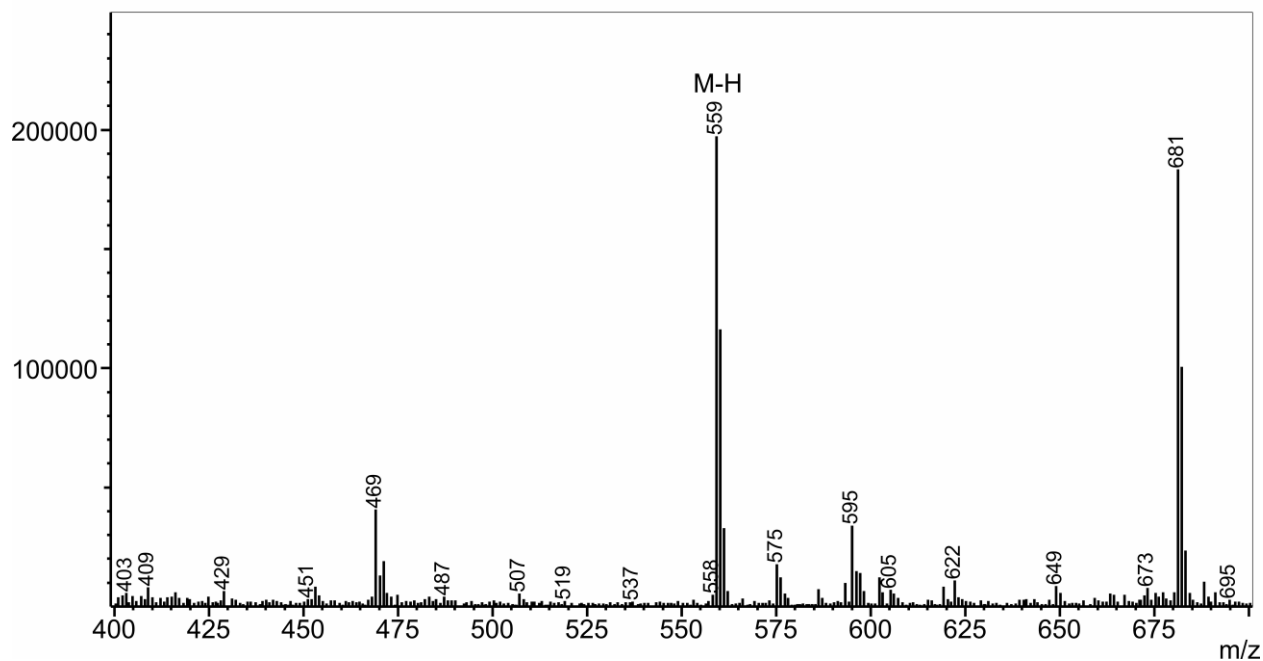

Fig. S4 ESI mass spectrum of 5c.

==== Shimadzu LabSolutions Data Report ====

<Spectrum>

Line#:1 R.Time:1,267(Scan#:77)  
MassPeaks:637  
RawMode:Single 1,233-1,300(75-79) BasePeak:669(1167287)  
BG Mode:None Segment 1 - Event 1

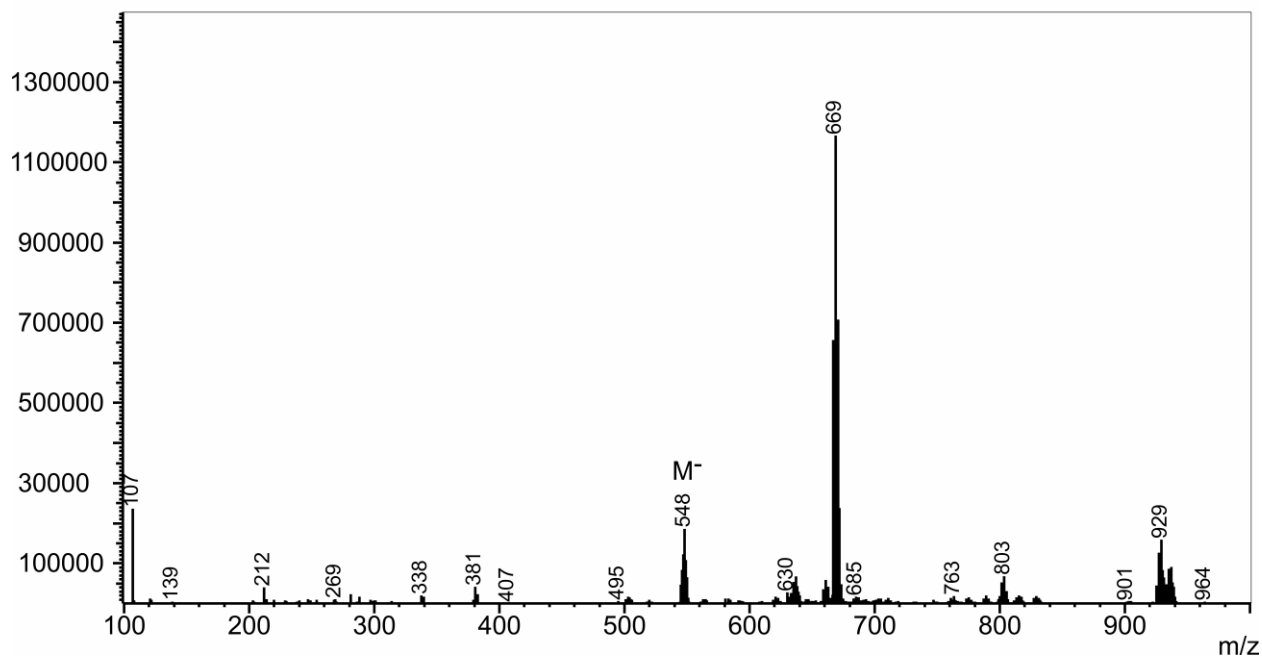

Fig. S5 ESI mass spectrum of 6b.

==== Shimadzu LabSolutions Data Report ====

<Spectrum>

Line#:1 R.Time:0,660(Scan#:133)  
MassPeaks:403  
RawMode:Single 0,660(133) BasePeak:571(1261103)  
BG Mode:None Segment 1 - Event 1

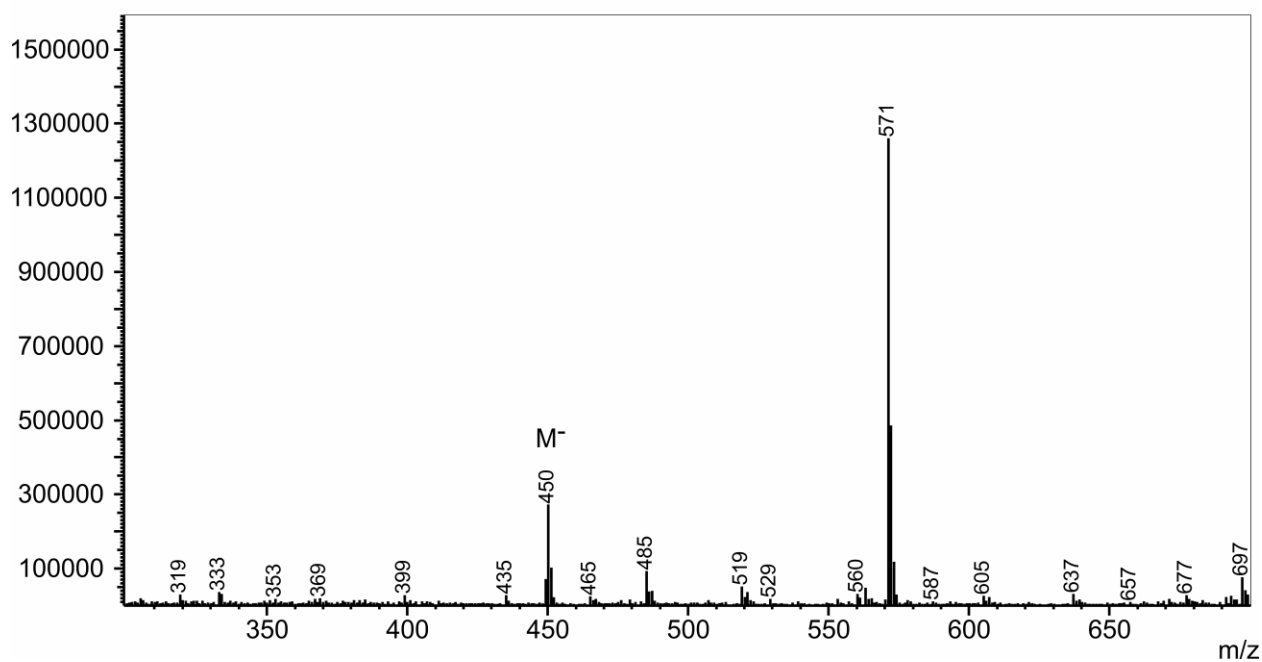

Fig. S6 ESI mass spectrum of 6d.

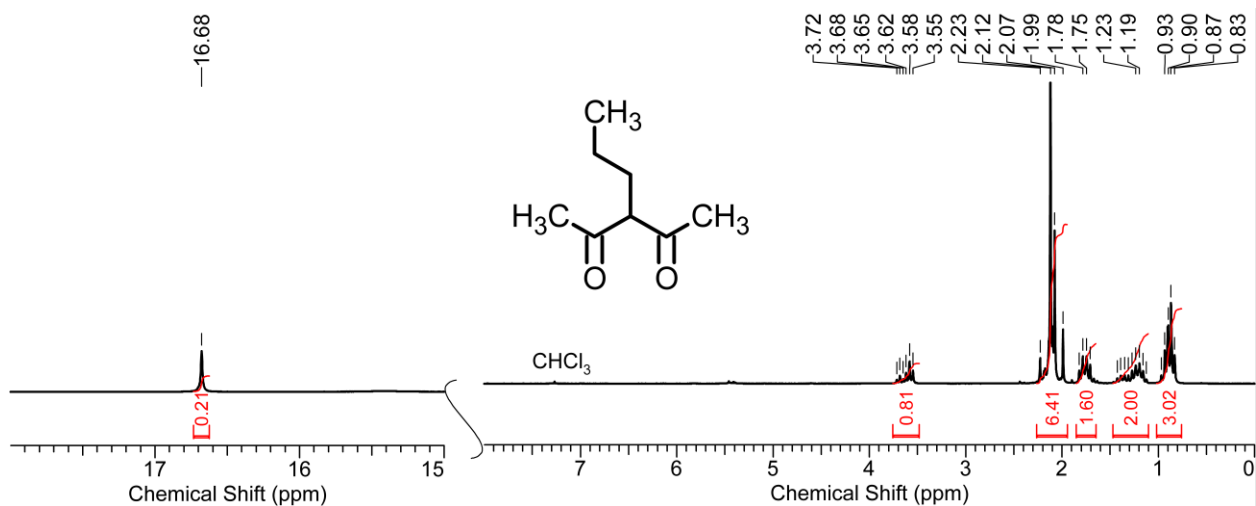

Fig. S7 <sup>1</sup>H NMR spectrum of **2** (CDCl<sub>3</sub>, 293 K).

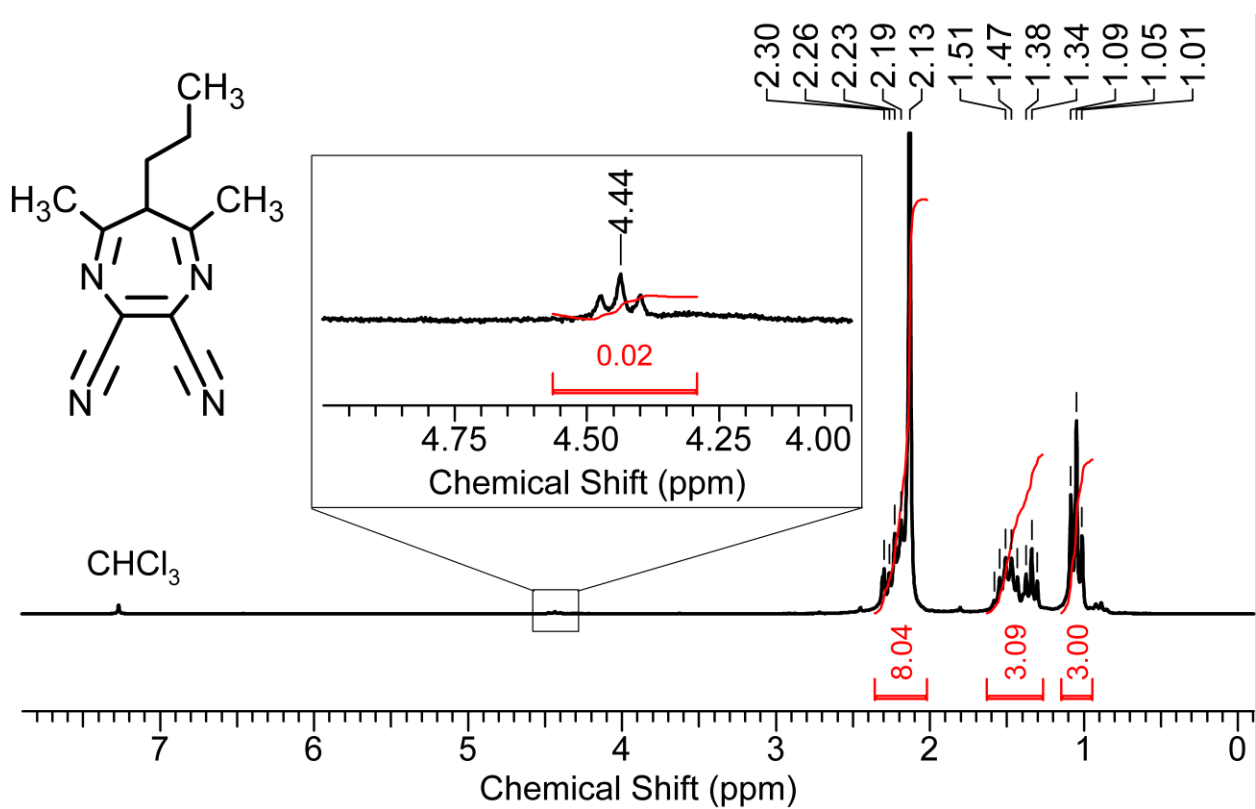

Fig. S8 <sup>1</sup>H NMR spectrum of **4** (CDCl<sub>3</sub>, 293 K).

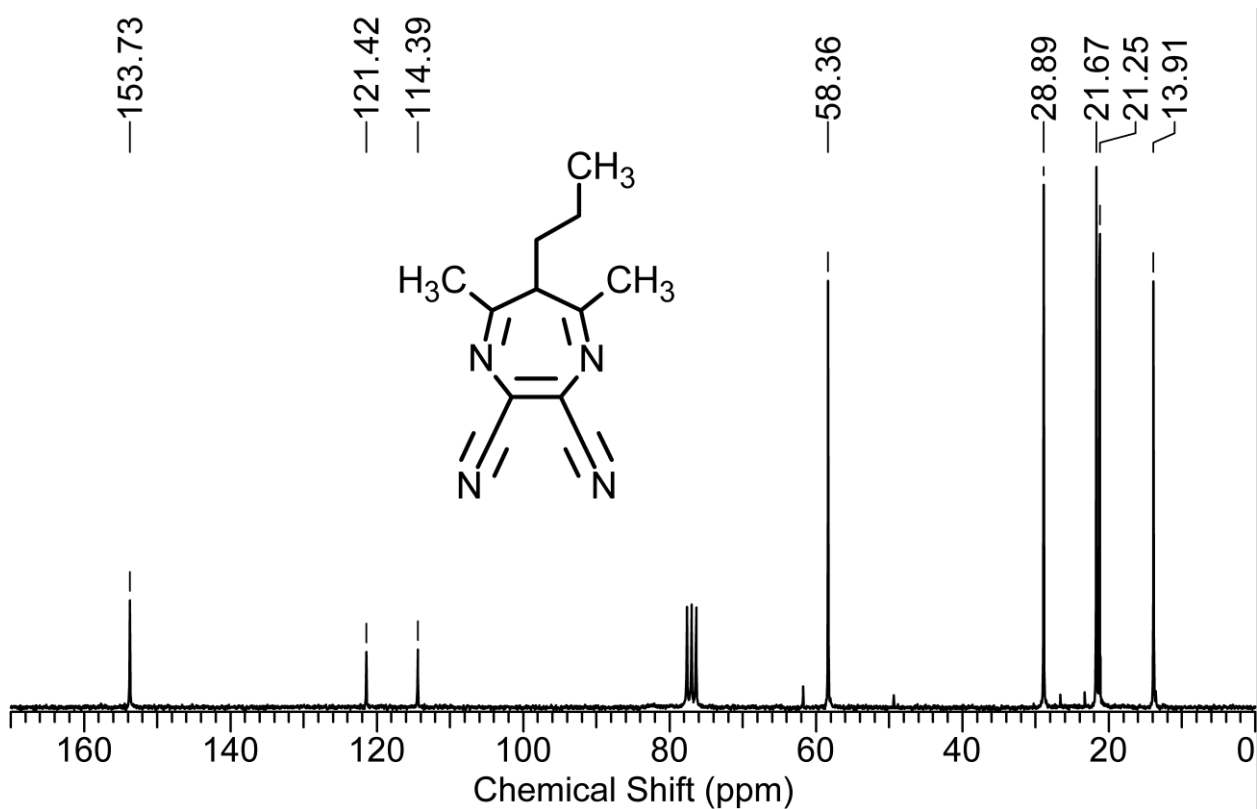

**Fig. S9**  $^{13}\text{C}$  NMR spectrum of **4** ( $\text{CDCl}_3$ , 293 K).

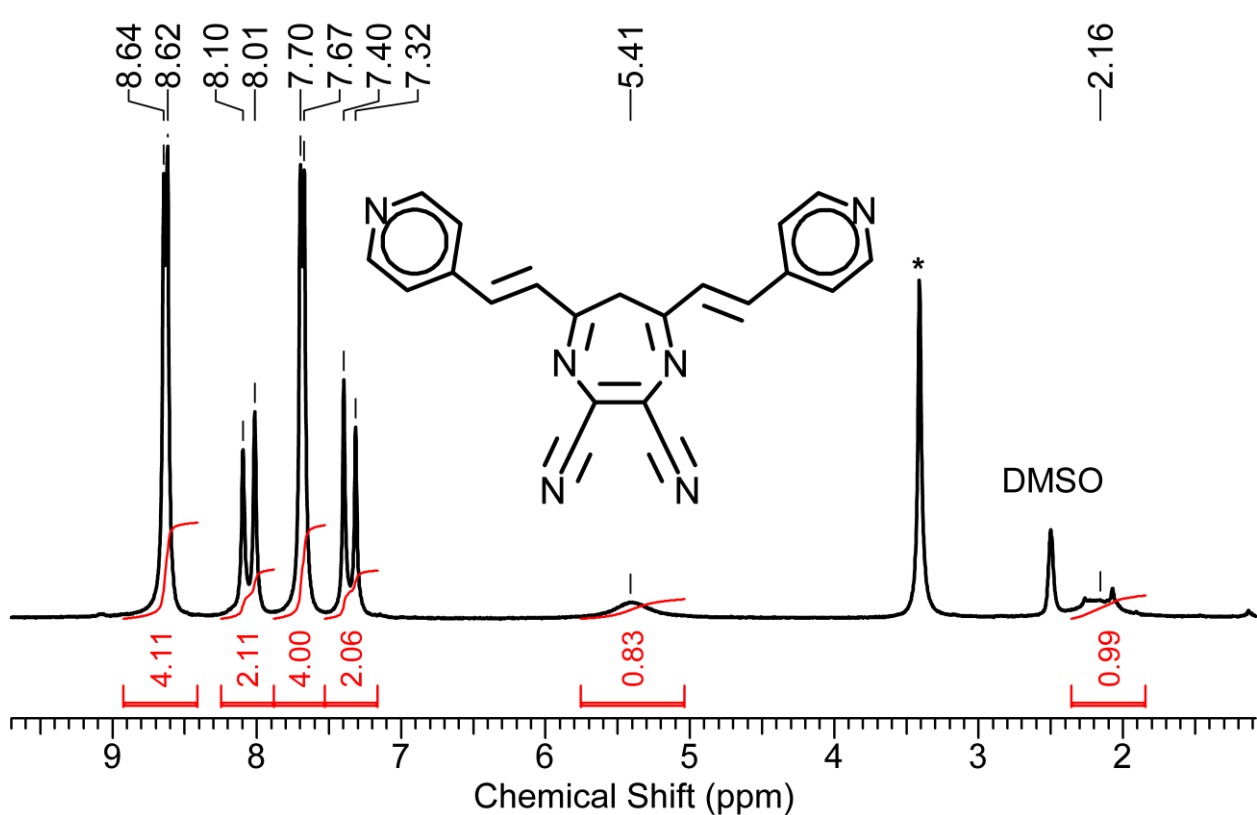

**Fig. S10**  $^1\text{H}$  NMR spectrum of **5a** ( $\text{DMSO-}d_6$ , 293 K).

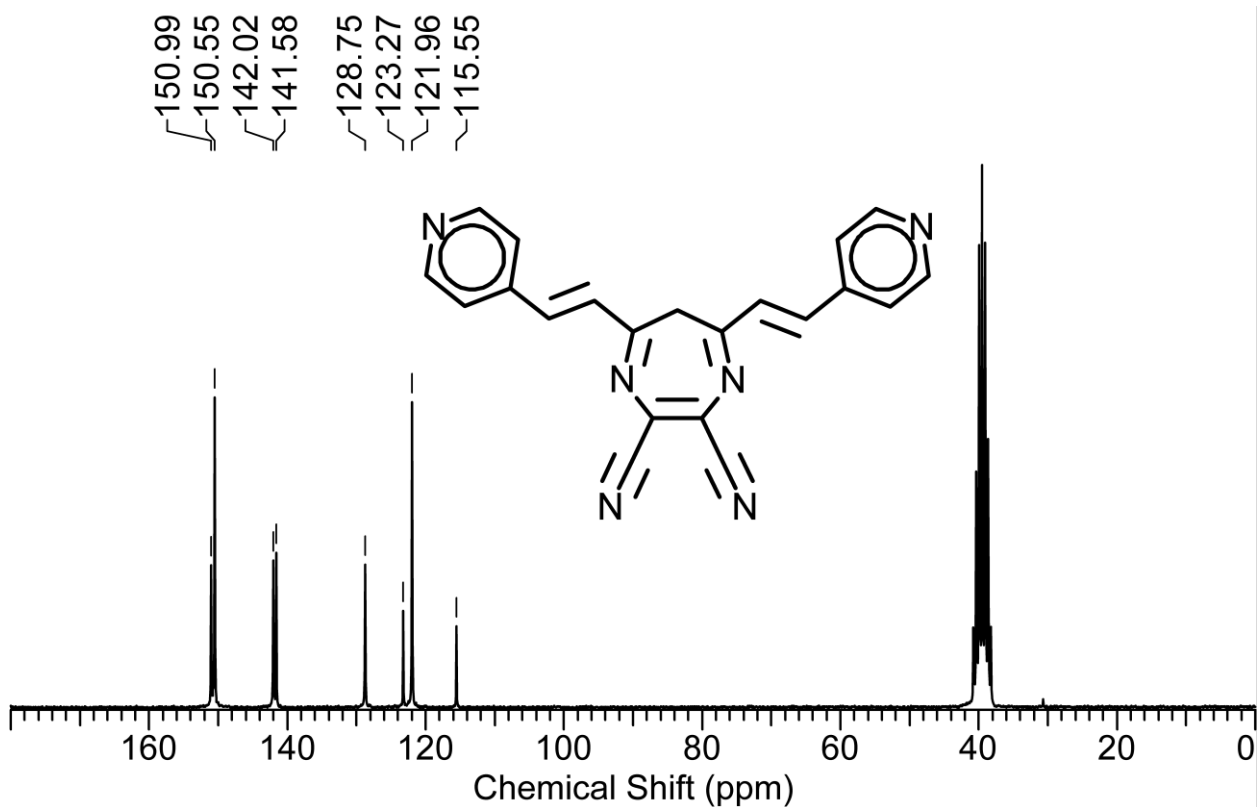

**Fig. S11**  $^{13}\text{C}$  NMR spectrum of **5a** (DMSO- $d_6$ , 293 K).

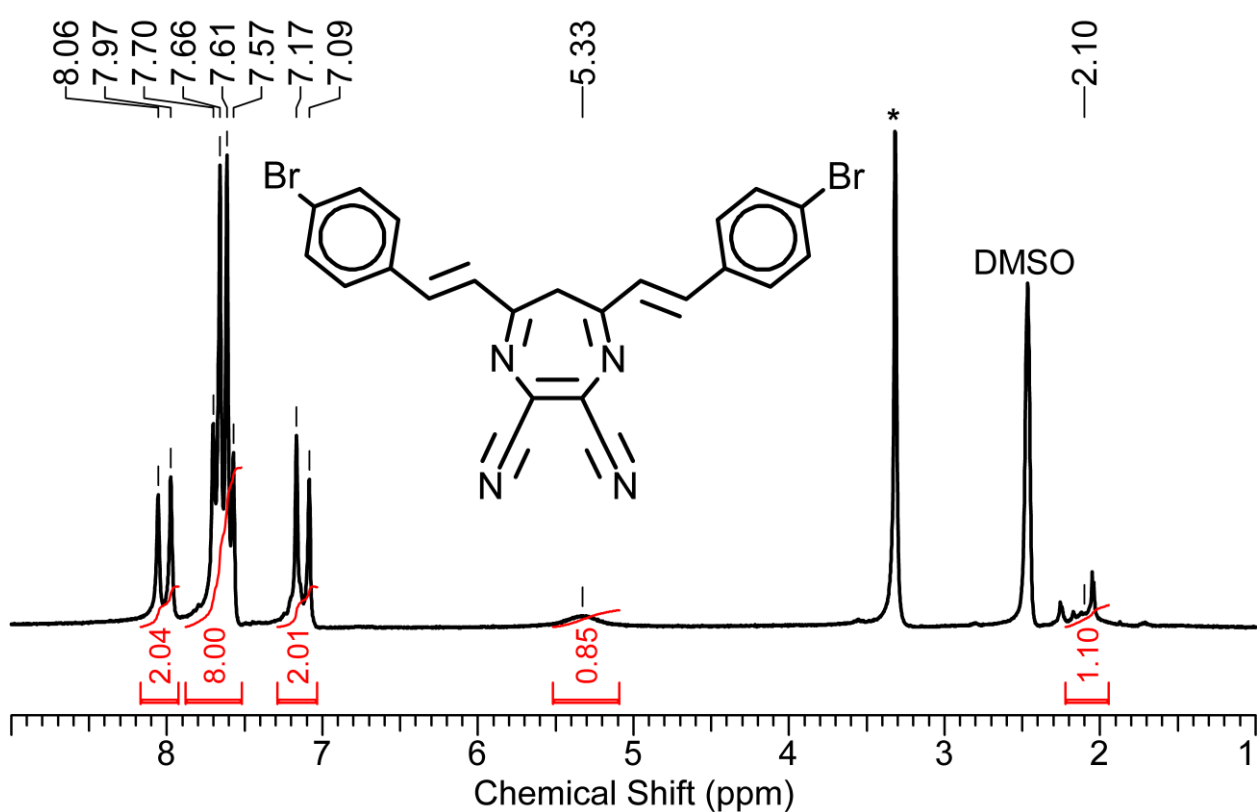

**Fig. S12**  $^1\text{H}$  NMR spectrum of **5b** (DMSO- $d_6$ , 293 K).

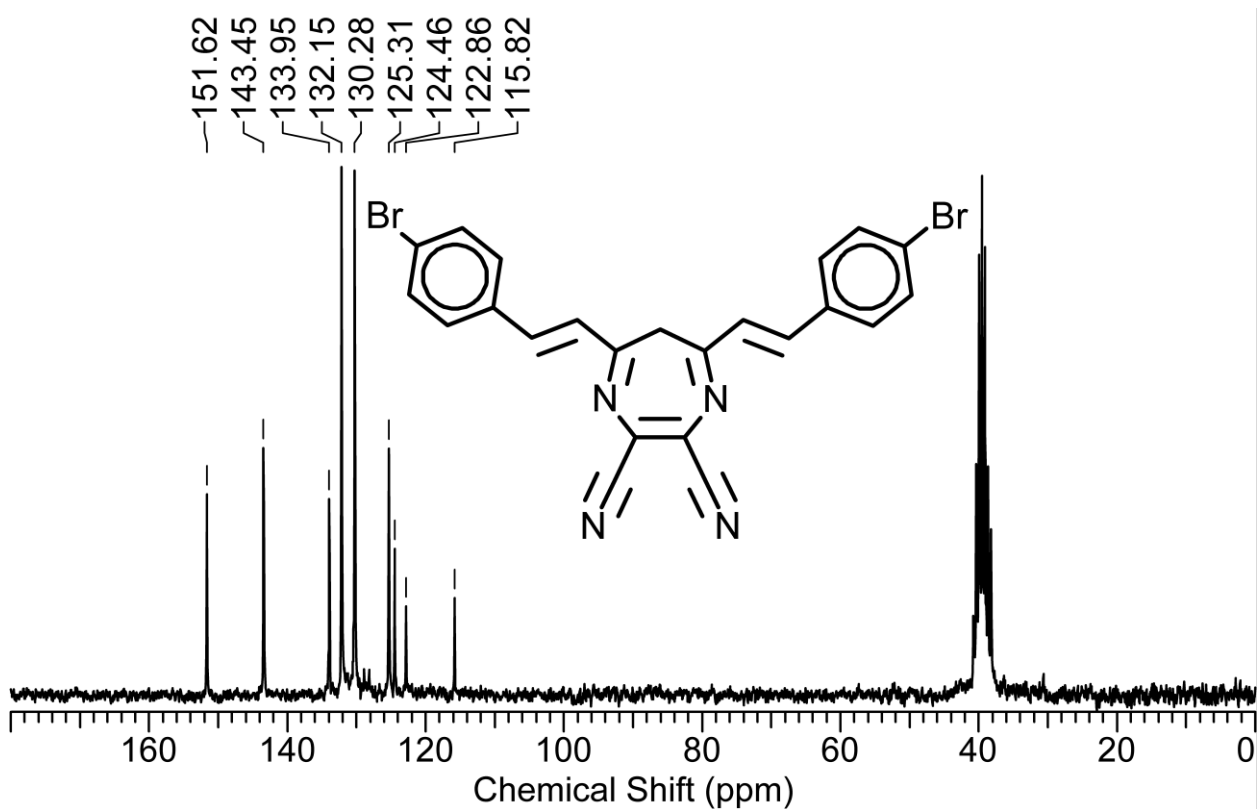

**Fig. S13** <sup>13</sup>C NMR spectrum of **5b** (DMSO-*d*<sub>6</sub>, 293 K).

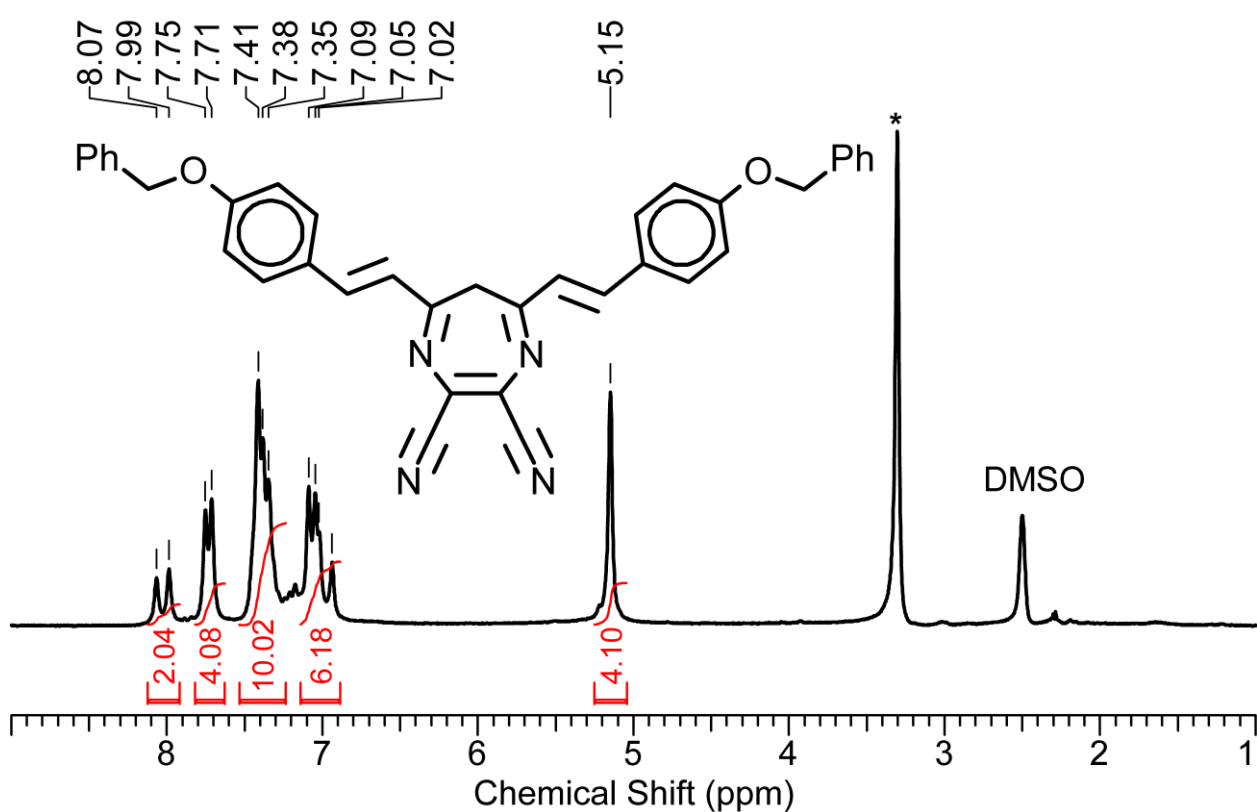

**Fig. S14** <sup>1</sup>H NMR spectrum of **5c** (DMSO-*d*<sub>6</sub>, 293 K).



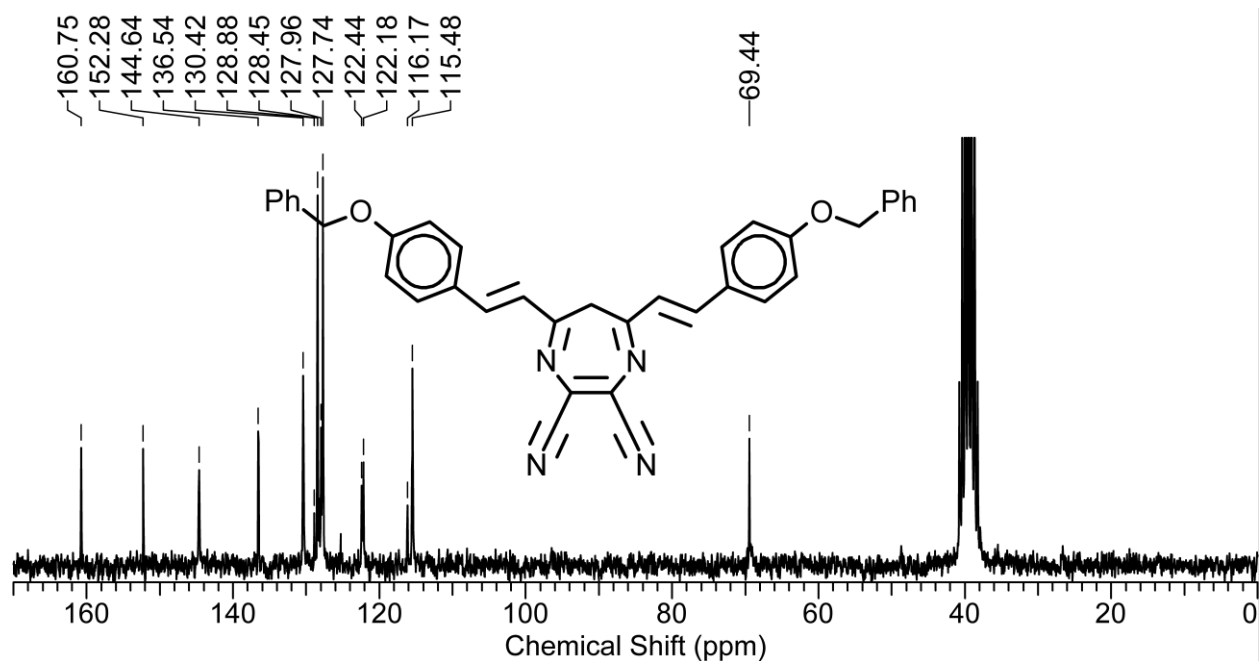

**Fig. S15**  $^{13}\text{C}$  NMR spectrum of **5c** (DMSO- $d_6$ , 293 K).

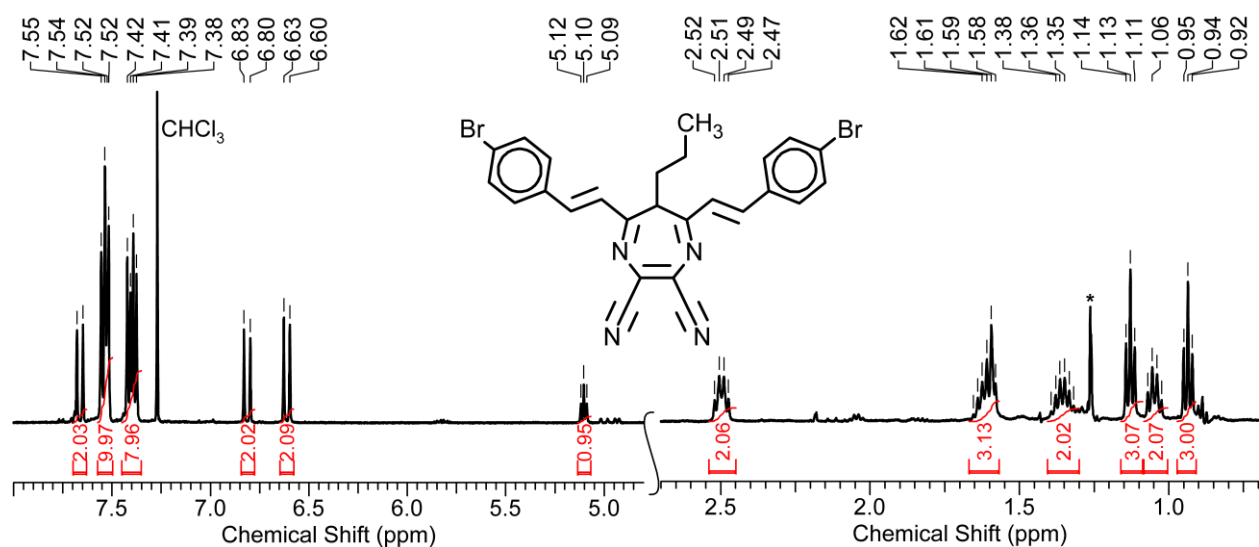

**Fig. S16**  $^1\text{H}$  NMR spectrum of **6b** ( $\text{CDCl}_3$ , 293 K).

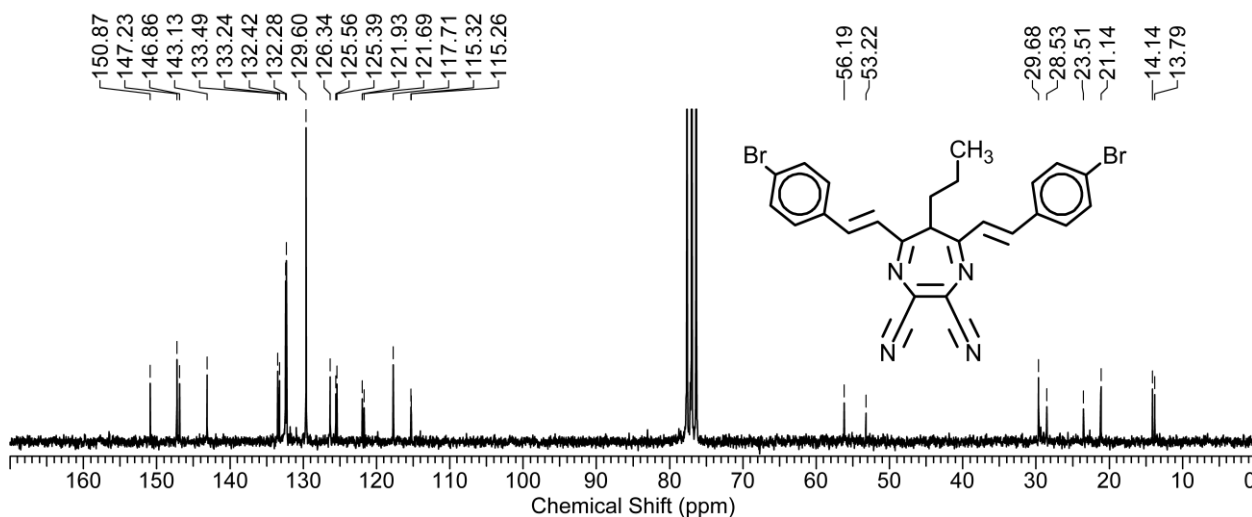

**Fig. S17**  $^{13}\text{C}$  NMR spectrum of **6b** ( $\text{CDCl}_3$ , 293 K).

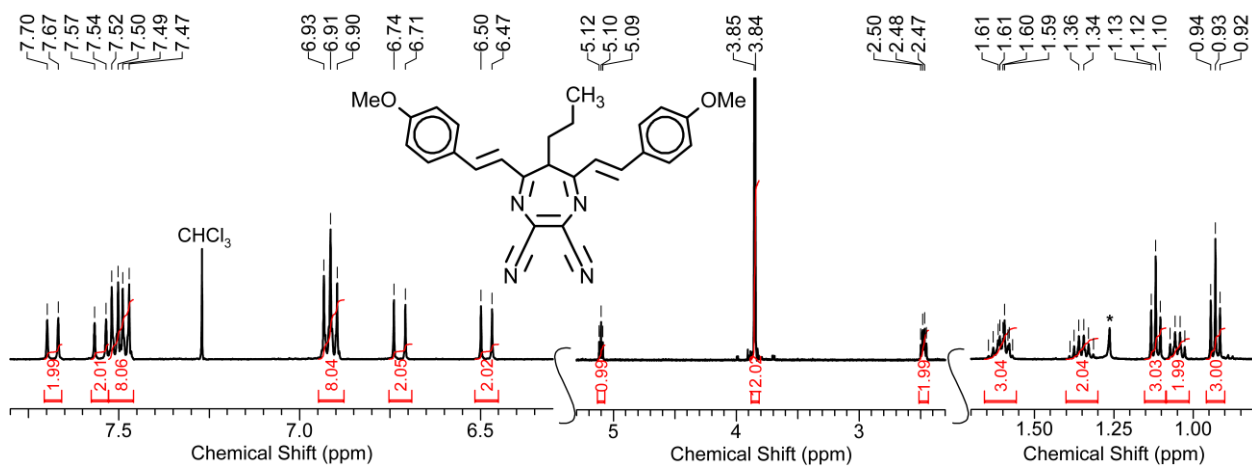

**Fig. S18**  $^1\text{H}$  NMR spectrum of **6d** ( $\text{CDCl}_3$ , 293 K).

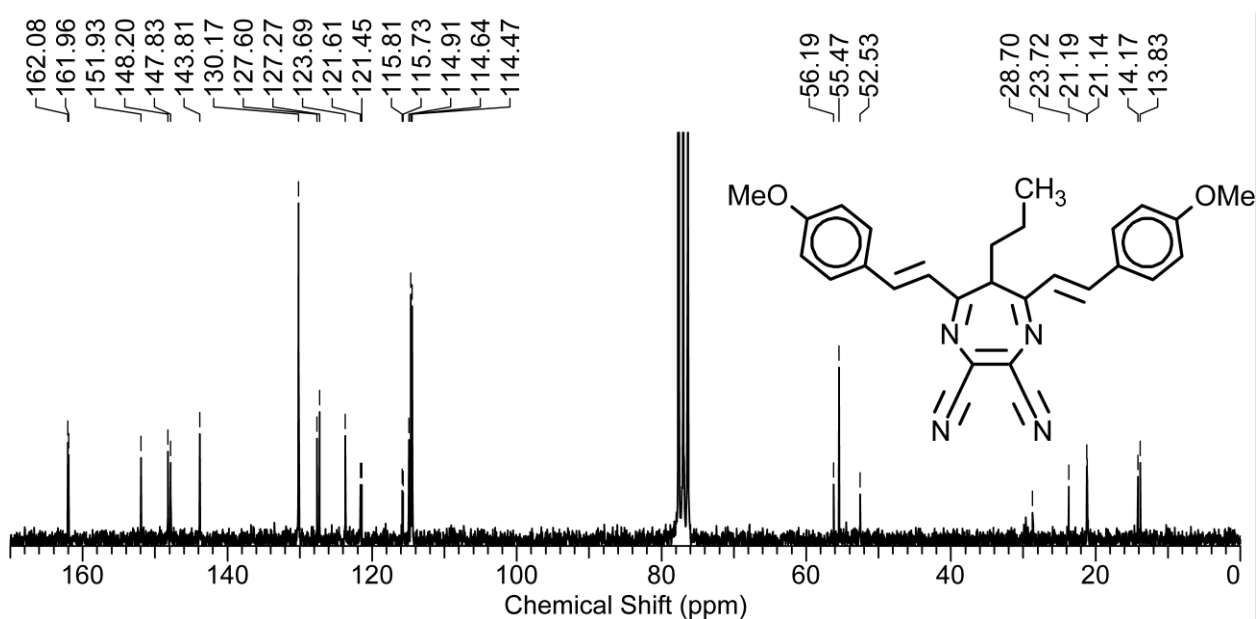

**Fig. S19**  $^{13}\text{C}$  NMR spectrum of **6d** ( $\text{CDCl}_3$ , 293 K).

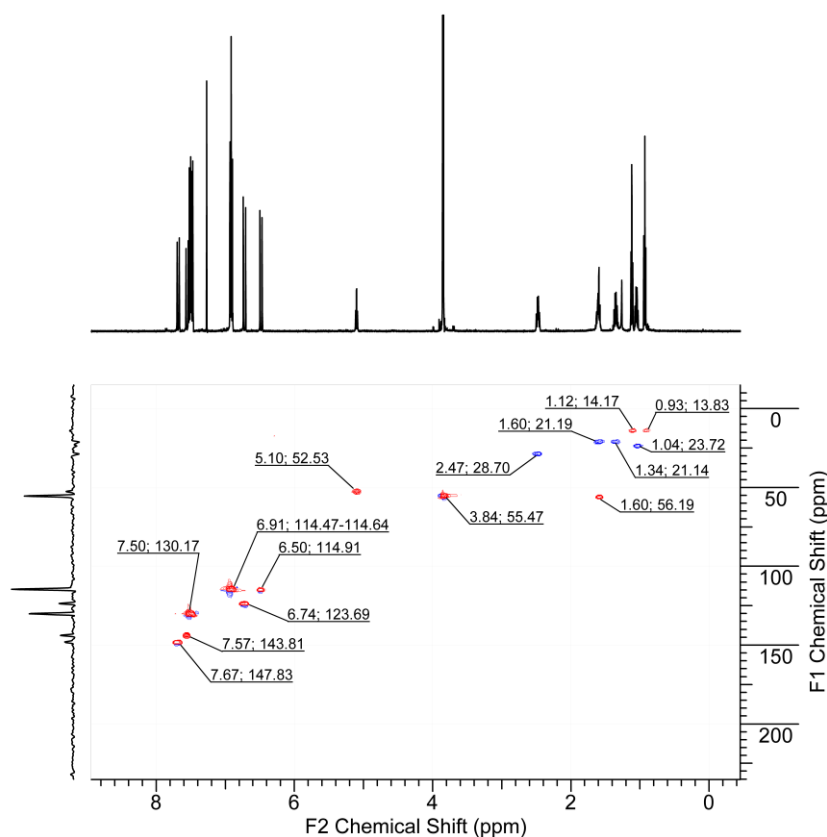

Fig. S20  $^1\text{H}$ - $^{13}\text{C}$  HSQC NMR spectrum of **6d** ( $\text{CDCl}_3$ , 293 K).

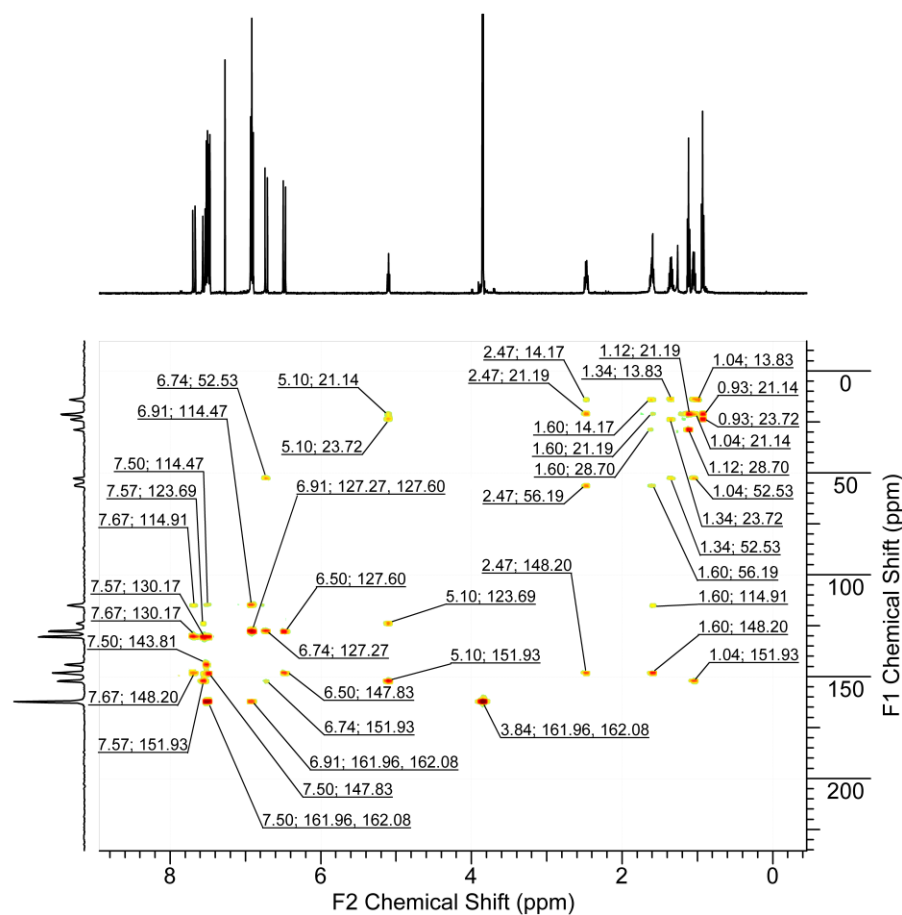

Fig. S21  $^1\text{H}$ - $^{13}\text{C}$  HMBC NMR spectrum of **6d** ( $\text{CDCl}_3$ , 293 K).

**Table S1** Proton-carbon connectivities from  $^1\text{H}$ - $^{13}\text{C}$  HSQC and  $^1\text{H}$ - $^{13}\text{C}$  HMBC spectra for **6d**<sup>§</sup>

| Proton (ppm)                             | $^3J$ (Hz) | carbon atom attached | $\alpha$ -carbon atom | $\beta$ -carbon atom              |
|------------------------------------------|------------|----------------------|-----------------------|-----------------------------------|
| $^{\text{Pr}}\text{CH}_3^*$ 0.94-0.92    | t, 7.4     | 13.84                | 21.14                 | 23.72                             |
| $^{\alpha}\text{CH}_2^*$ 1.07-1.03       | q, 7.7     | 23.72                | 21.14; 52.53          | 13.84; 151.93                     |
| $^{\text{Pr}}\text{CH}_3^{**}$ 1.13-1.10 | t, 7.3     | 14.17                | 21.19                 | 28.70                             |
| $^{\beta}\text{CH}_2^*$ 1.39-1.31        | -          | 21.14                | 13.83; 23.72          | 52.53                             |
| $^{\beta}\text{CH}_2^{**}$               | 1.65-1.57  | -                    | 14.17; 28.70          | 56.19                             |
| 6-H $^{**}$                              |            | -                    | 56.19                 | 28.70; 148.20                     |
| $^{\alpha}\text{CH}_2^{**}$ 2.50-2.45    | q, 7.7     | 28.70                | 21.19; 56.19          | 14.17; 148.20                     |
| $\text{OCH}_3^{***}$ 3.85-3.84           | s          | 55.47                | -                     | 161.96, 162.08                    |
| 6-H $^*$ 5.12-5.09                       | t, 7.5     | 52.53                | 23.72; 151.93         | 21.14; 123.69                     |
| 1'-H $^{**}$ 6.50-6.47                   | d, 15.3    | 114.91               | 147.83                | 127.60                            |
| 1'-H $^*$ 6.74-6.71                      | d, 15.9    | 123.69               | 151.93                | 52.53; 127.27                     |
| <i>m</i> -Ar $^{***}$ 6.93-6.90          | -          | 114.47, 114.64       | 161.96, 162.08        | 127.27, 127.60                    |
| <i>o</i> -Ar $^{***}$ 7.52-7.47          | -          | 130.17               | 114.47, 114.64        | 143.81, 147.83;<br>161.96, 162.08 |
| 2'-H $^*$ 7.57-7.54                      | d, 15.9    | 143.81               | 123.69                | 151.93; 130.17                    |
| 2'-H $^{**}$ 7.70-7.67                   | d, 15.3    | 147.83               | 114.91                | 148.20; 130.17                    |

<sup>§</sup>Proton signals of conformers with either axial or equatorial position of the 6-propyl group are designated as \* and \*\*, respectively.

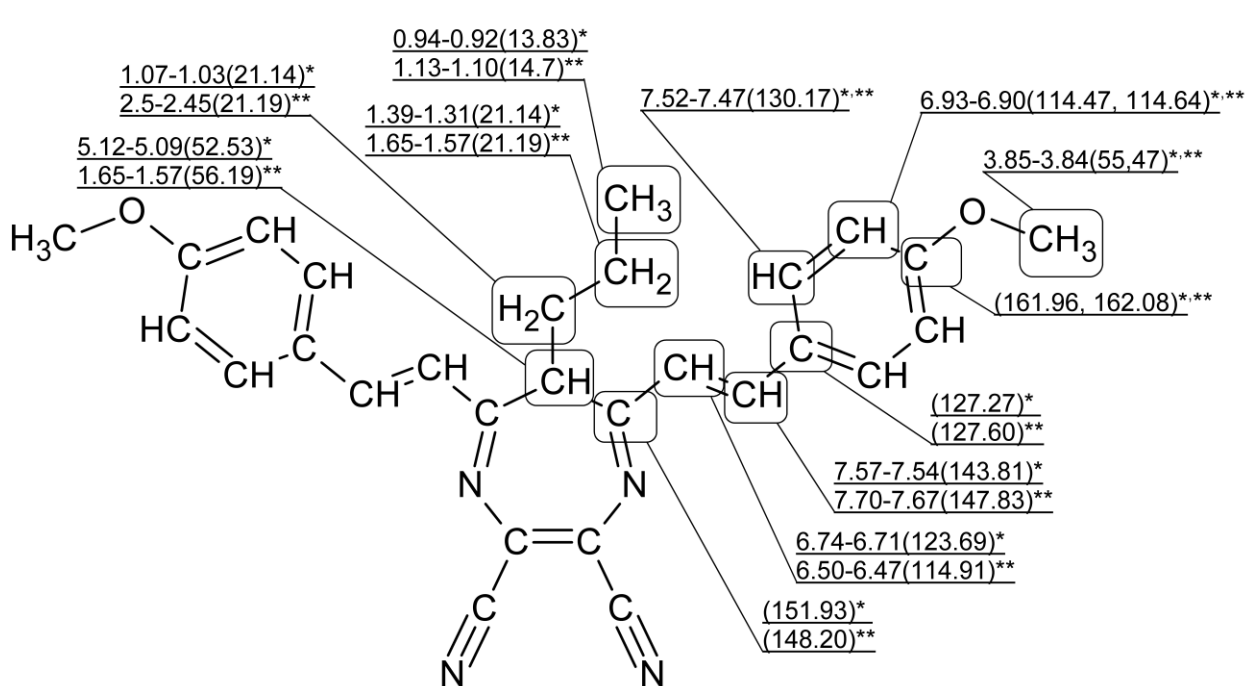**Fig. S22** NMR data analysis for **6d**.

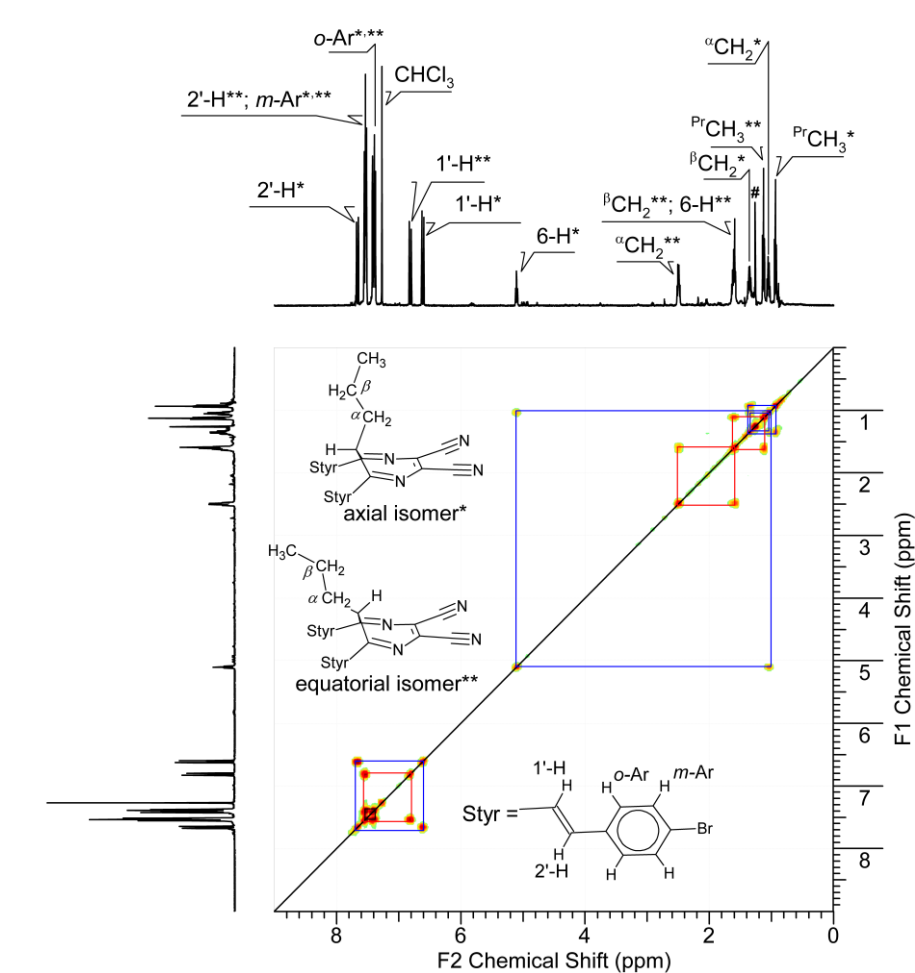

Fig. S23  $^1\text{H}$ - $^1\text{H}$  COSY NMR spectrum of **6b** ( $\text{CDCl}_3$ , 293 K).

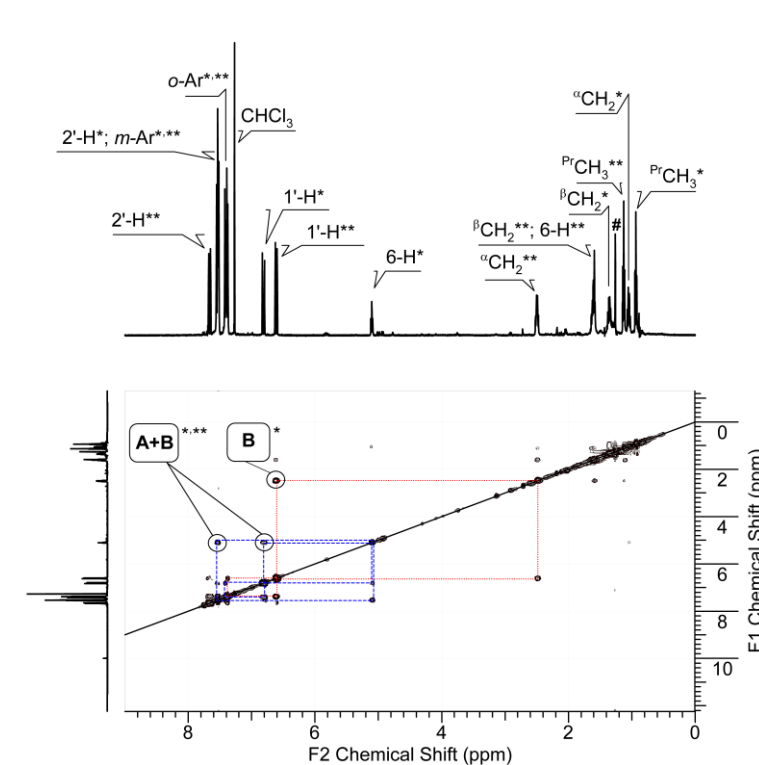

Fig. S24  $^1\text{H}$ - $^1\text{H}$  NOESY NMR spectrum of **6b** ( $\text{CDCl}_3$ , 293 K).

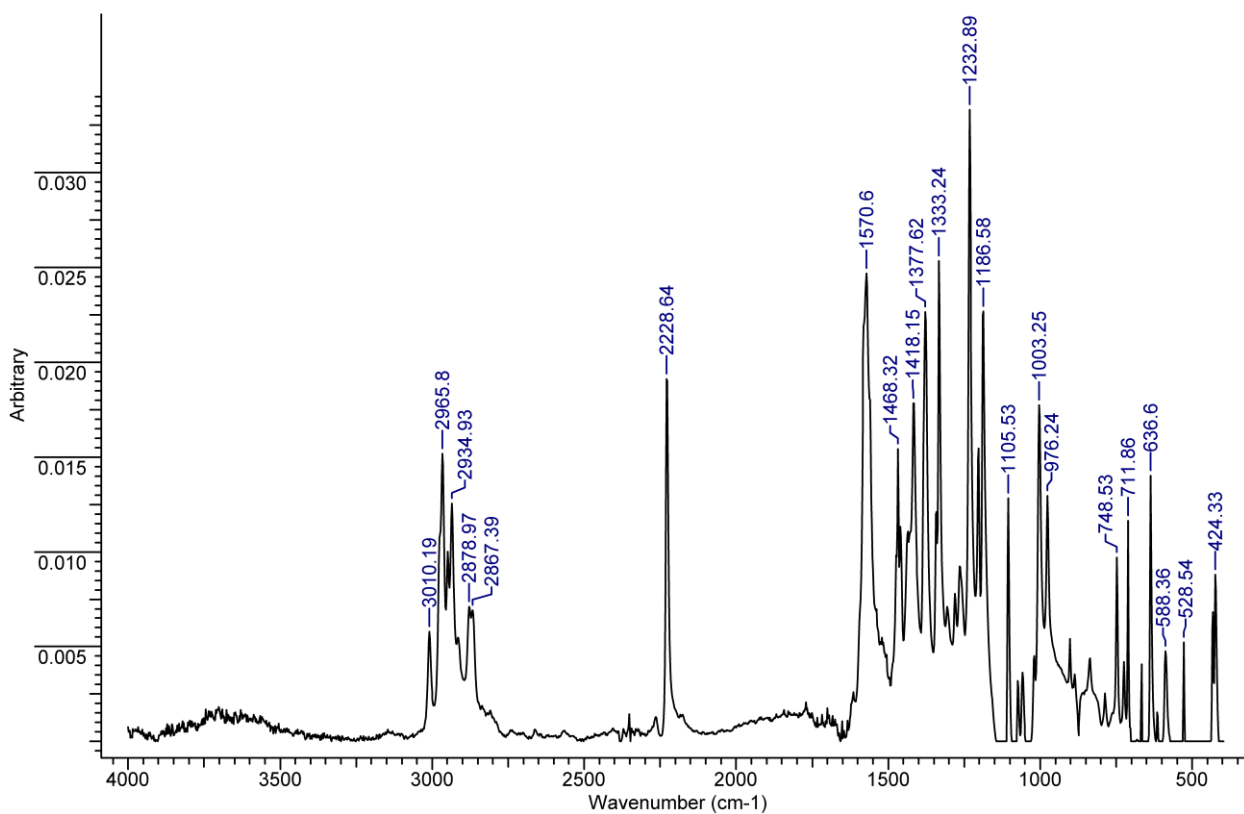

Fig. S25 IR spectrum of 4.

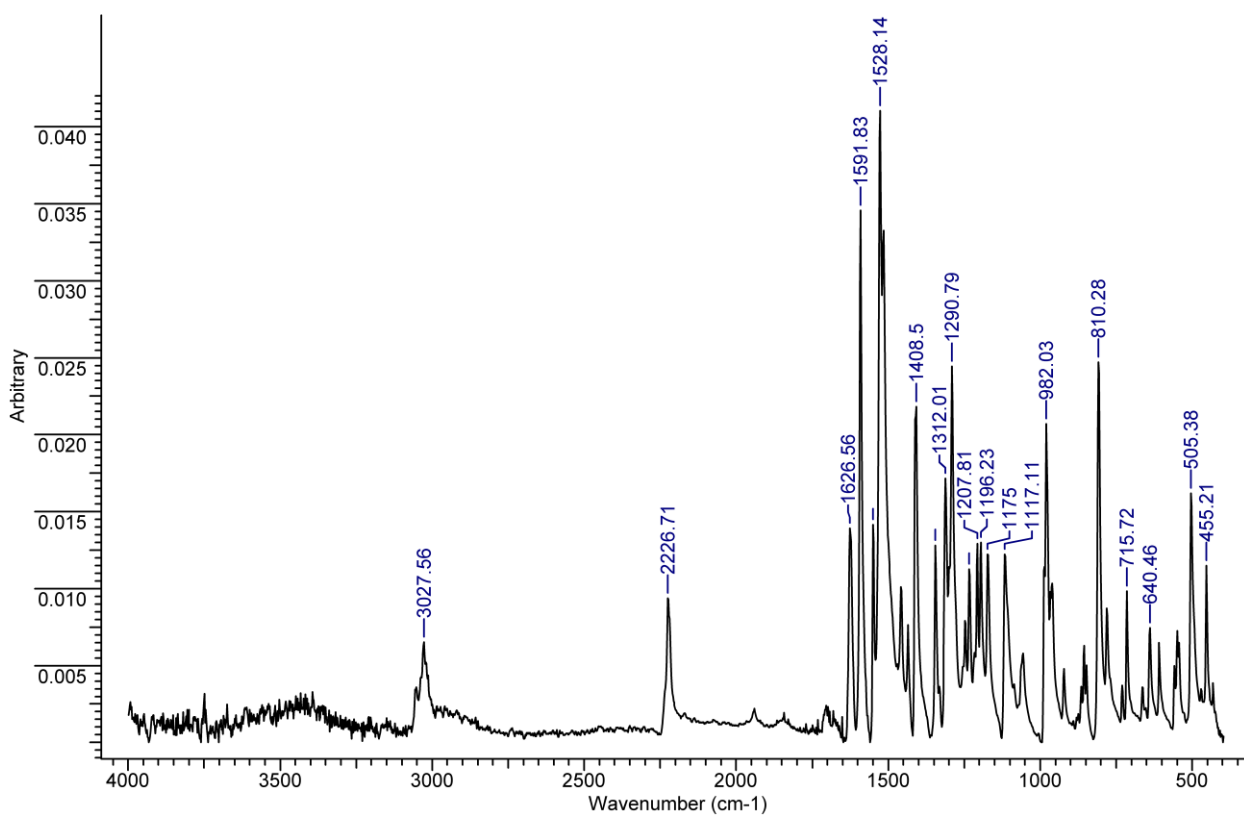

Fig. S26 IR spectrum of 5a.

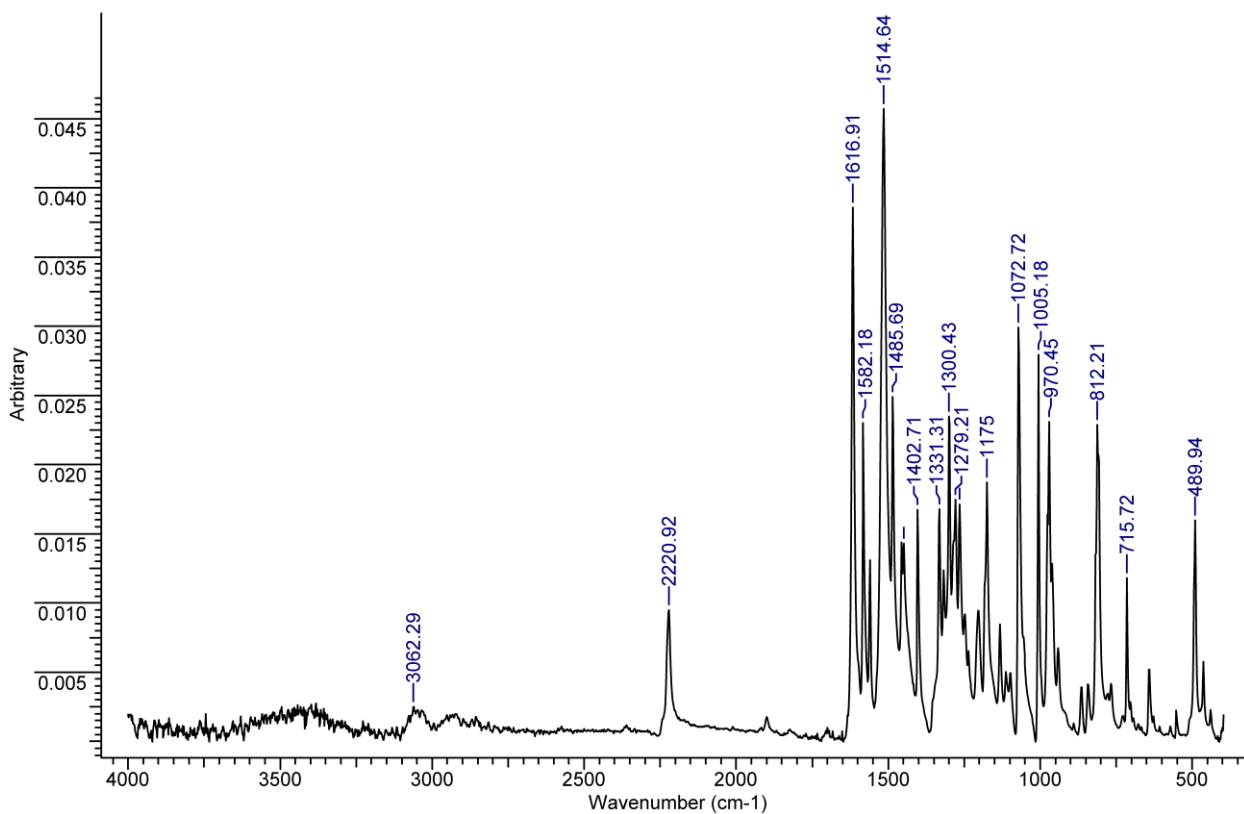

**Fig. S27** IR spectrum of **5b**.

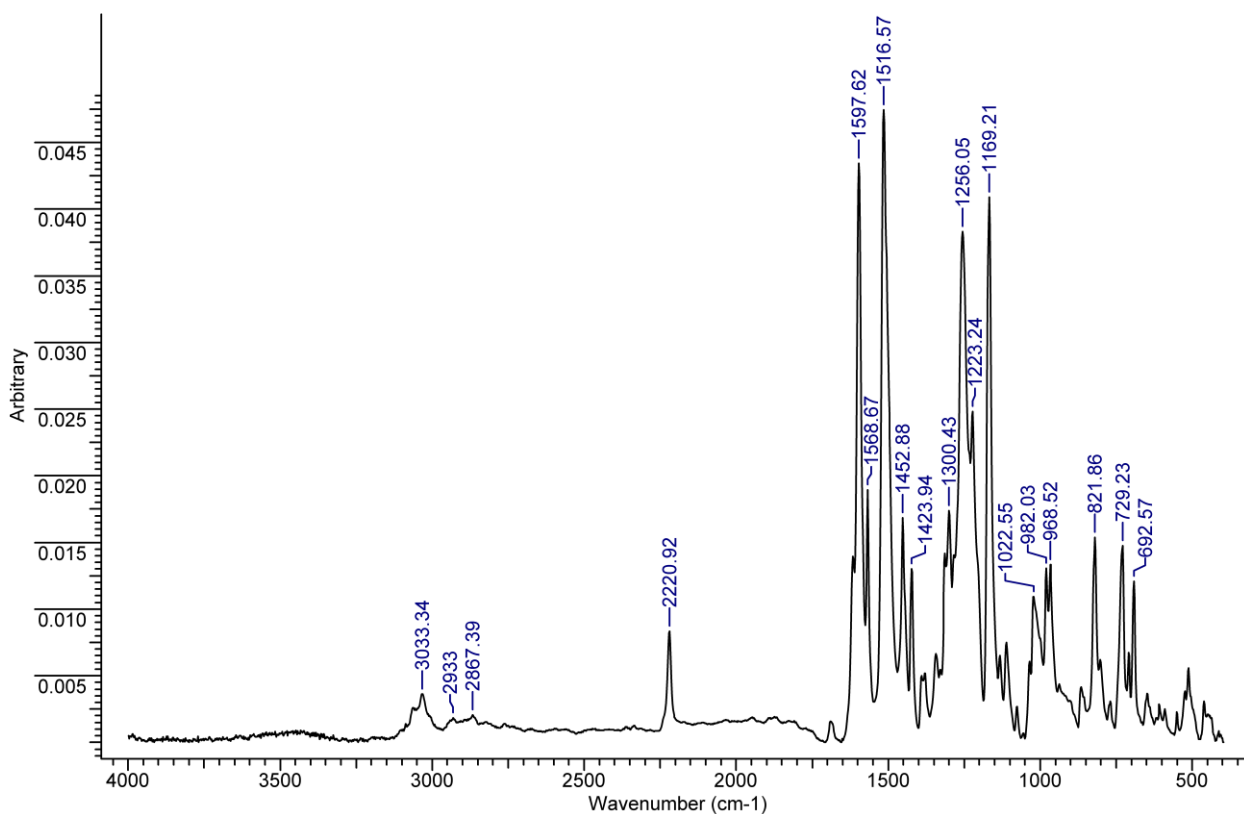

**Fig. S28** IR spectrum of **5c**.

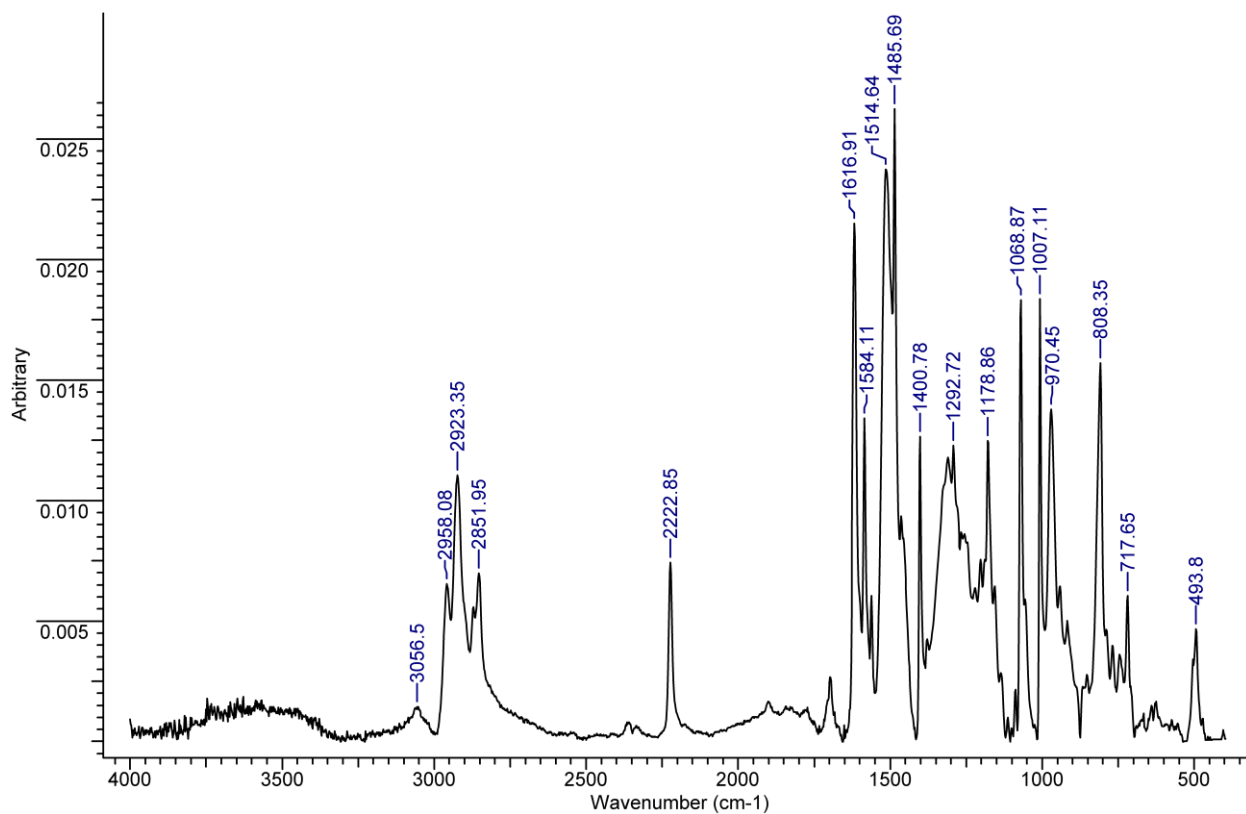

**Fig. S29** IR spectrum of **6b**.

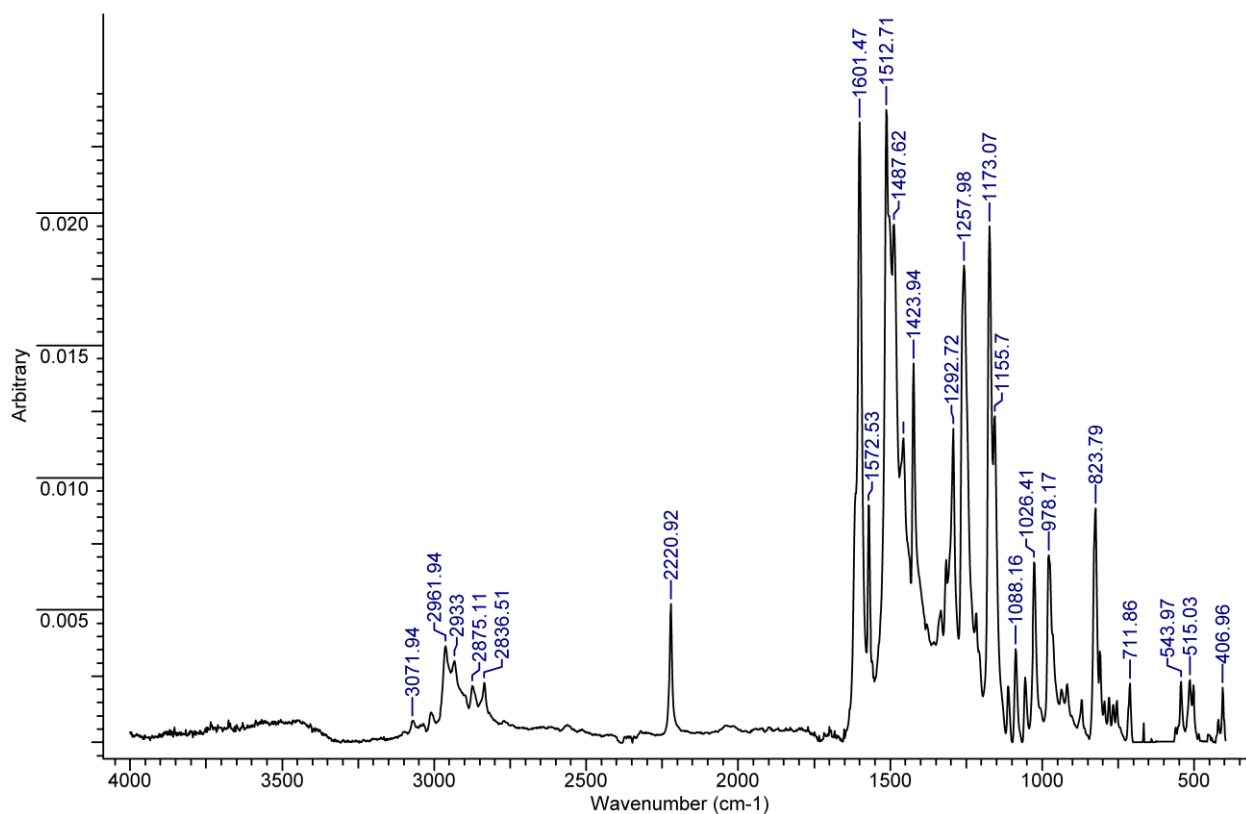

**Fig. S30** IR spectrum of **6d**.



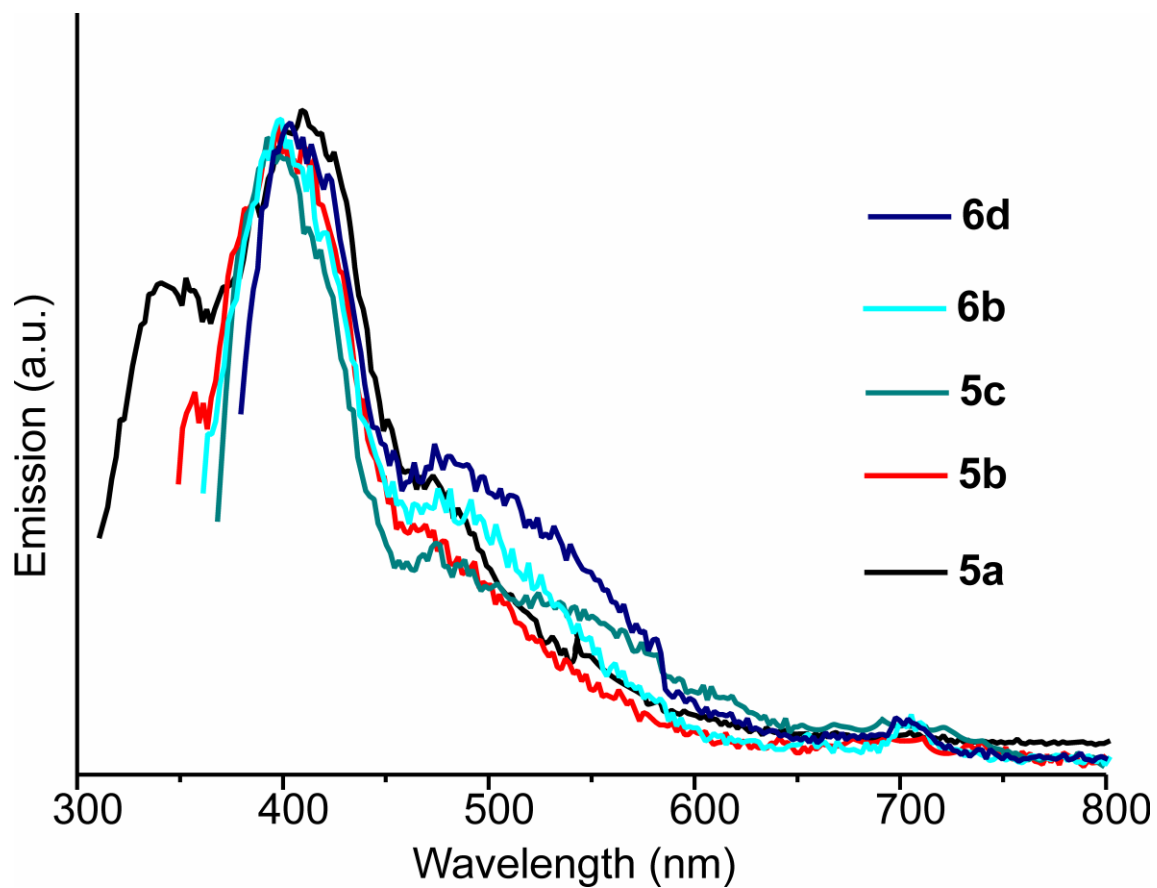

**Fig. S31** Fluorescence of 5,7-bis(2'-arylethenyl)-6*H*-1,4-diazepine-2,3-dicarbonitriles in MeOH solution.

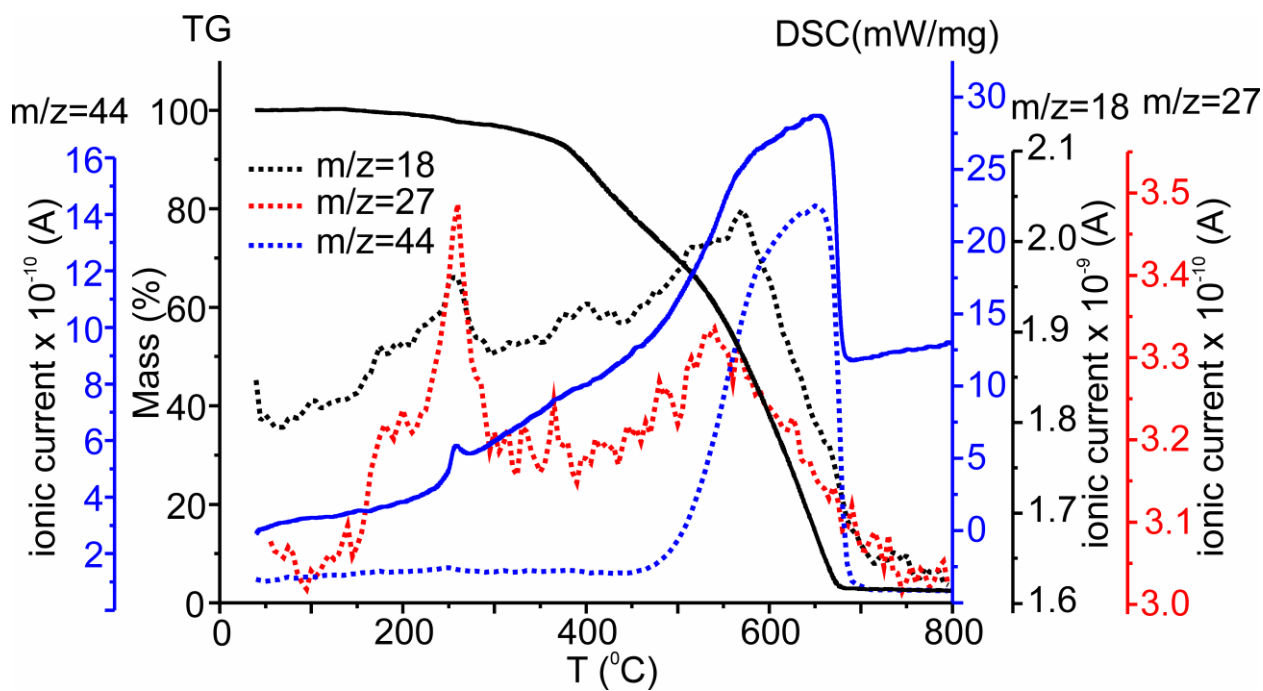

Fig. S32 Thermogravimetric analysis of 5b.

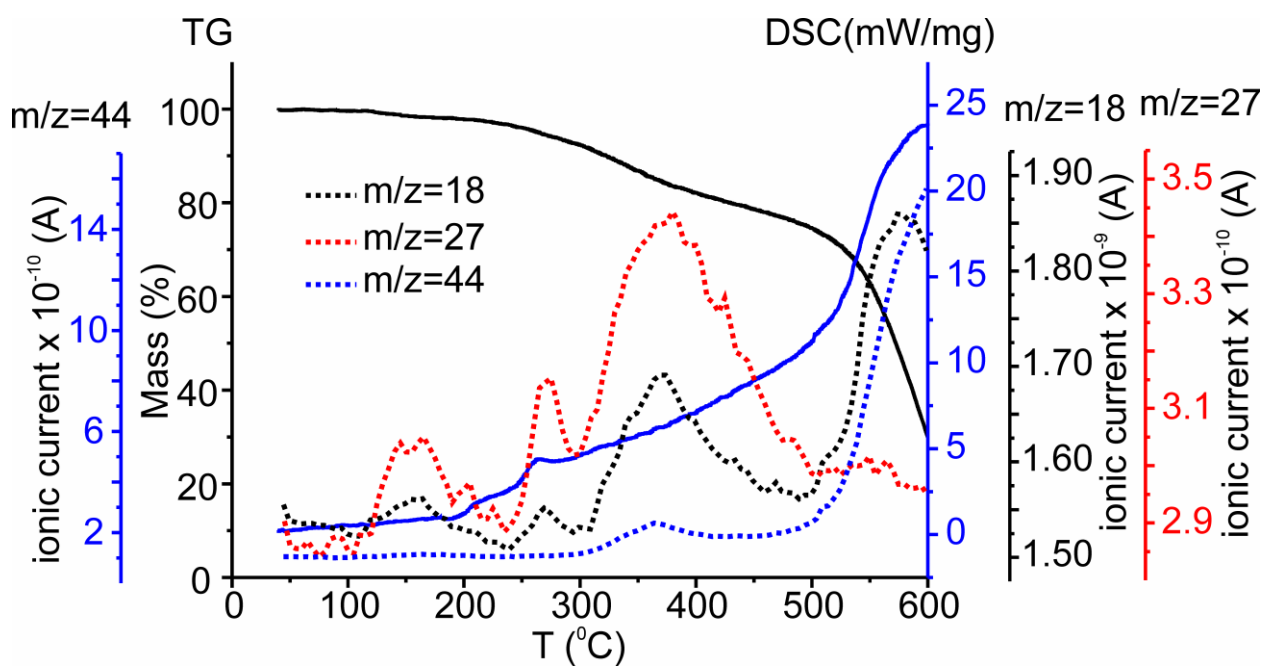

Fig. S33 Thermogravimetric analysis of 5c.

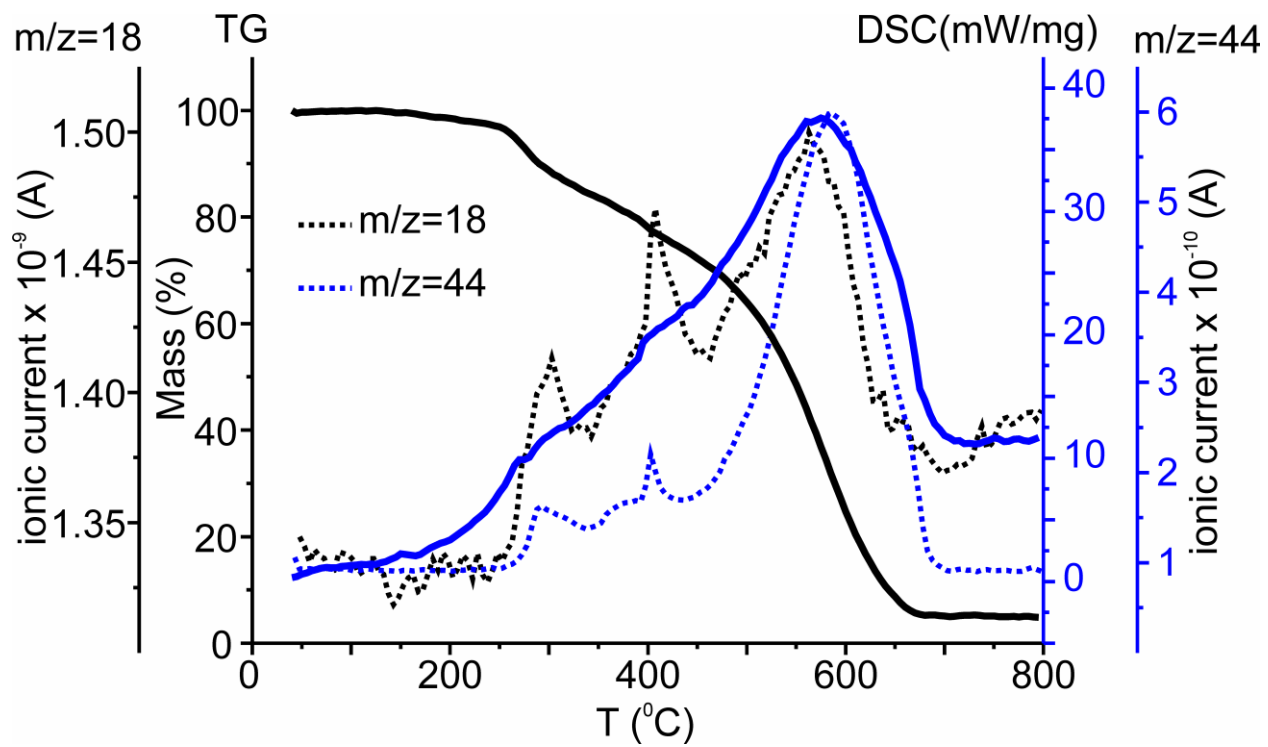

**Fig. S34** Thermogravimetric analysis of **6d**.

### Full Computational Details

Quantum-chemical calculations were performed at the DFT level using hybrid functional B3LYP with 6-31G(d,p) basis sets as provided by the GAMESS package.

equatorial isomer of **4**:

Table S2.

TOTAL FREE ENERGY IN SOLVENT = -684.488494 A.U.

|   |             |             |             |
|---|-------------|-------------|-------------|
| N | 0.64788000  | -1.20620600 | 1.00787100  |
| C | -0.54955600 | -0.71390400 | 0.96917900  |
| C | 1.65989300  | -0.74707300 | 0.20776600  |
| C | -0.95257000 | 0.25194500  | -0.14019000 |
| C | 1.84692300  | 0.58300500  | -0.16802100 |
| N | 1.04445700  | 1.63036100  | 0.19992200  |
| C | -0.23885100 | 1.51242300  | 0.33139600  |
| C | -1.50320100 | -1.06647700 | 2.07303000  |
| C | -1.00135200 | 2.62541700  | 0.98639300  |
| C | 2.69629000  | -1.70900700 | -0.06365700 |
| N | 3.50737800  | -2.50809900 | -0.30051700 |
| C | 3.07317000  | 0.96553100  | -0.81841400 |
| N | 4.04300400  | 1.29020400  | -1.37213000 |
| C | -2.45170500 | 0.38299900  | -0.44165600 |
| C | -3.02301400 | -0.84195100 | -1.17171800 |
| C | -4.51645900 | -0.69990000 | -1.47784500 |
| H | -1.81341900 | -0.16633600 | 2.61655700  |
| H | -1.51678900 | 2.26551800  | 1.88448400  |
| H | -0.43281900 | -0.07899900 | -1.05007900 |
| H | -3.02026600 | 0.57062300  | 0.47633100  |
| H | -2.59654800 | 1.26518500  | -1.07634300 |
| H | -2.46723100 | -0.98935400 | -2.10660700 |
| H | -2.85653000 | -1.74813900 | -0.57573100 |
| H | -4.89495000 | -1.57851600 | -2.00876400 |
| H | -5.10150200 | -0.58786500 | -0.55825000 |
| H | -4.71034200 | 0.17791100  | -2.10407600 |
| H | -2.41362700 | -1.53017300 | 1.68146700  |
| H | -1.77272200 | 3.01951700  | 0.31694600  |
| H | -0.31940100 | 3.42746900  | 1.26807100  |
| H | -1.02028200 | -1.74871500 | 2.77240000  |

Table S3.

#### TD-DFT output

STATE # 1 ENERGY = 4.447300 EV  
OSCILLATOR STRENGTH = 0.271200

|     |     | EXCITATION | DE-EXCITATION |
|-----|-----|------------|---------------|
| OCC | VIR | AMPLITUDE  | AMPLITUDE     |
| I   | A   | X(I->A)    | Y(A->I)       |
| --- | --- | -----      | -----         |
| 55  | 58  | 0.263050   | 0.000000      |
| 56  | 58  | -0.109440  | 0.000000      |
| 56  | 59  | -0.163550  | 0.000000      |
| 57  | 58  | 0.595390   | 0.000000      |

STATE # 2 ENERGY = 5.013400 EV  
 OSCILLATOR STRENGTH = 0.101700

| OCC | VIR | EXCITATION | DE-EXCITATION |
|-----|-----|------------|---------------|
|     |     | AMPLITUDE  | AMPLITUDE     |
| I   | A   | X(I->A)    | Y(A->I)       |
| --- | --- | -----      | -----         |
| 54  | 58  | -0.129670  | 0.000000      |
| 55  | 59  | 0.248200   | 0.000000      |
| 56  | 58  | -0.303260  | 0.000000      |
| 56  | 61  | -0.120730  | 0.000000      |
| 57  | 59  | 0.520070   | 0.000000      |

STATE # 3 ENERGY = 5.103700 EV  
 OSCILLATOR STRENGTH = 0.037800

| OCC | VIR | EXCITATION | DE-EXCITATION |
|-----|-----|------------|---------------|
|     |     | AMPLITUDE  | AMPLITUDE     |
| I   | A   | X(I->A)    | Y(A->I)       |
| --- | --- | -----      | -----         |
| 56  | 58  | 0.577020   | 0.000000      |
| 57  | 58  | 0.144420   | 0.000000      |
| 57  | 59  | 0.340780   | 0.000000      |

STATE # 4 ENERGY = 5.137500 EV  
 OSCILLATOR STRENGTH = 0.104200

| OCC | VIR | EXCITATION | DE-EXCITATION |
|-----|-----|------------|---------------|
|     |     | AMPLITUDE  | AMPLITUDE     |
| I   | A   | X(I->A)    | Y(A->I)       |
| --- | --- | -----      | -----         |
| 55  | 58  | 0.622680   | 0.000000      |
| 57  | 58  | -0.249200  | 0.000000      |
| 57  | 59  | 0.136790   | 0.000000      |

STATE # 5 ENERGY = 5.895800 EV  
 OSCILLATOR STRENGTH = 0.046000

| OCC | VIR | EXCITATION | DE-EXCITATION |
|-----|-----|------------|---------------|
|     |     | AMPLITUDE  | AMPLITUDE     |
| I   | A   | X(I->A)    | Y(A->I)       |
| --- | --- | -----      | -----         |
| 54  | 59  | 0.180320   | 0.000000      |
| 55  | 59  | 0.162160   | 0.000000      |
| 55  | 61  | -0.151240  | 0.000000      |
| 56  | 59  | 0.454510   | 0.000000      |
| 57  | 58  | 0.146070   | 0.000000      |
| 57  | 60  | -0.181350  | 0.000000      |
| 57  | 61  | -0.302760  | 0.000000      |

STATE # 6 ENERGY = 5.993900 EV  
 OSCILLATOR STRENGTH = 0.004800

| OCC | VIR | EXCITATION | DE-EXCITATION |
|-----|-----|------------|---------------|
|     |     | AMPLITUDE  | AMPLITUDE     |
| I   | A   | X(I->A)    | Y(A->I)       |
| --- | --- | -----      | -----         |

|    |    |           |          |
|----|----|-----------|----------|
| 54 | 58 | 0.588350  | 0.000000 |
| 55 | 59 | 0.302210  | 0.000000 |
| 56 | 59 | -0.106570 | 0.000000 |

STATE # 7 ENERGY = 6.132400 EV  
 OSCILLATOR STRENGTH = 0.010100

| OCC | VIR | EXCITATION<br>AMPLITUDE | DE-EXCITATION<br>AMPLITUDE |
|-----|-----|-------------------------|----------------------------|
| I   | A   | X(I->A)                 | Y(A->I)                    |
| --- | --- | -----                   | -----                      |
| 49  | 58  | -0.114330               | 0.000000                   |
| 57  | 60  | 0.568130                | 0.000000                   |
| 57  | 61  | -0.313740               | 0.000000                   |

STATE # 8 ENERGY = 6.510300 EV  
 OSCILLATOR STRENGTH = 0.003100

| OCC | VIR | EXCITATION<br>AMPLITUDE | DE-EXCITATION<br>AMPLITUDE |
|-----|-----|-------------------------|----------------------------|
| I   | A   | X(I->A)                 | Y(A->I)                    |
| --- | --- | -----                   | -----                      |
| 55  | 59  | 0.140970                | 0.000000                   |
| 56  | 59  | 0.326790                | 0.000000                   |
| 57  | 60  | 0.257820                | 0.000000                   |
| 57  | 61  | 0.479180                | 0.000000                   |
| 57  | 62  | -0.117940               | 0.000000                   |

STATE # 9 ENERGY = 6.541800 EV  
 OSCILLATOR STRENGTH = 0.125600

| OCC | VIR | EXCITATION<br>AMPLITUDE | DE-EXCITATION<br>AMPLITUDE |
|-----|-----|-------------------------|----------------------------|
| I   | A   | X(I->A)                 | Y(A->I)                    |
| --- | --- | -----                   | -----                      |
| 47  | 58  | -0.100180               | 0.000000                   |
| 49  | 58  | 0.506000                | 0.000000                   |
| 55  | 59  | 0.306210                | 0.000000                   |
| 56  | 59  | -0.118610               | 0.000000                   |
| 57  | 59  | -0.119370               | 0.000000                   |
| 57  | 60  | 0.154910                | 0.000000                   |

STATE # 10 ENERGY = 6.716100 EV  
 OSCILLATOR STRENGTH = 0.000500

| OCC | VIR | EXCITATION<br>AMPLITUDE | DE-EXCITATION<br>AMPLITUDE |
|-----|-----|-------------------------|----------------------------|
| I   | A   | X(I->A)                 | Y(A->I)                    |
| --- | --- | -----                   | -----                      |
| 48  | 58  | 0.528710                | 0.000000                   |
| 48  | 61  | -0.104140               | 0.000000                   |
| 49  | 63  | -0.132240               | 0.000000                   |
| 50  | 58  | -0.329290               | 0.000000                   |

STATE # 11 ENERGY = 6.793200 EV  
 OSCILLATOR STRENGTH = 0.012200

| OCC | VIR | EXCITATION<br>AMPLITUDE | DE-EXCITATION<br>AMPLITUDE |
|-----|-----|-------------------------|----------------------------|
| I   | A   | X(I->A)                 | Y(A->I)                    |
| --- | --- | -----                   | -----                      |

| OCC | VIR | AMPLITUDE | AMPLITUDE |
|-----|-----|-----------|-----------|
| I   | A   | X(I->A)   | Y(A->I)   |
| --- | --- | -----     | -----     |
| 49  | 60  | 0.124290  | 0.000000  |
| 50  | 58  | 0.148110  | 0.000000  |
| 51  | 58  | 0.520620  | 0.000000  |
| 52  | 58  | 0.283480  | 0.000000  |
| 53  | 58  | 0.217360  | 0.000000  |

STATE # 12 ENERGY = 6.879200 EV  
 OSCILLATOR STRENGTH = 0.783300

|     |     | EXCITATION | DE-EXCITATION |
|-----|-----|------------|---------------|
| OCC | VIR | AMPLITUDE  | AMPLITUDE     |
| I   | A   | X(I->A)    | Y(A->I)       |
| --- | --- | -----      | -----         |
| 47  | 58  | 0.123390   | 0.000000      |
| 49  | 58  | 0.386970   | 0.000000      |
| 54  | 58  | 0.270840   | 0.000000      |
| 55  | 59  | -0.306430  | 0.000000      |
| 56  | 58  | -0.122020  | 0.000000      |
| 56  | 59  | 0.118020   | 0.000000      |
| 56  | 61  | 0.100260   | 0.000000      |
| 57  | 59  | 0.198480   | 0.000000      |

STATE # 13 ENERGY = 7.354000 EV  
 OSCILLATOR STRENGTH = 0.013800

|     |     | EXCITATION | DE-EXCITATION |
|-----|-----|------------|---------------|
| OCC | VIR | AMPLITUDE  | AMPLITUDE     |
| I   | A   | X(I->A)    | Y(A->I)       |
| --- | --- | -----      | -----         |
| 47  | 60  | 0.184410   | 0.000000      |
| 51  | 62  | -0.135140  | 0.000000      |
| 55  | 61  | 0.130200   | 0.000000      |
| 56  | 59  | 0.116580   | 0.000000      |
| 56  | 60  | -0.230810  | 0.000000      |
| 57  | 62  | 0.474760   | 0.000000      |

STATE # 14 ENERGY = 7.408300 EV  
 OSCILLATOR STRENGTH = 0.004400

|     |     | EXCITATION | DE-EXCITATION |
|-----|-----|------------|---------------|
| OCC | VIR | AMPLITUDE  | AMPLITUDE     |
| I   | A   | X(I->A)    | Y(A->I)       |
| --- | --- | -----      | -----         |
| 46  | 58  | -0.276600  | 0.000000      |
| 47  | 58  | -0.146300  | 0.000000      |
| 48  | 58  | -0.186010  | 0.000000      |
| 50  | 58  | -0.312310  | 0.000000      |
| 52  | 58  | 0.150650   | 0.000000      |
| 53  | 58  | 0.364830   | 0.000000      |

STATE # 15 ENERGY = 7.482000 EV  
 OSCILLATOR STRENGTH = 0.079800

EXCITATION DE-EXCITATION

| OCC | VIR | AMPLITUDE | AMPLITUDE |
|-----|-----|-----------|-----------|
| I   | A   | X(I->A)   | Y(A->I)   |
| --- | --- | -----     | -----     |
| 46  | 58  | -0.236270 | 0.000000  |
| 47  | 58  | 0.399930  | 0.000000  |
| 48  | 60  | 0.116020  | 0.000000  |
| 52  | 58  | 0.285630  | 0.000000  |
| 53  | 58  | -0.132700 | 0.000000  |
| 55  | 59  | 0.200990  | 0.000000  |
| 56  | 61  | 0.148270  | 0.000000  |

STATE # 16 ENERGY = 7.595800 EV  
 OSCILLATOR STRENGTH = 0.018700

| OCC | VIR | EXCITATION<br>AMPLITUDE | DE-EXCITATION<br>AMPLITUDE |
|-----|-----|-------------------------|----------------------------|
| I   | A   | X(I->A)                 | Y(A->I)                    |
| --- | --- | -----                   | -----                      |
| 45  | 58  | 0.140830                | 0.000000                   |
| 47  | 58  | 0.132250                | 0.000000                   |
| 48  | 58  | 0.104550                | 0.000000                   |
| 50  | 58  | 0.140790                | 0.000000                   |
| 51  | 58  | -0.111190               | 0.000000                   |
| 52  | 58  | -0.261800               | 0.000000                   |
| 53  | 58  | 0.458350                | 0.000000                   |
| 54  | 58  | -0.107700               | 0.000000                   |
| 56  | 61  | 0.161990                | 0.000000                   |

STATE # 17 ENERGY = 7.717300 EV  
 OSCILLATOR STRENGTH = 0.036500

| OCC | VIR | EXCITATION<br>AMPLITUDE | DE-EXCITATION<br>AMPLITUDE |
|-----|-----|-------------------------|----------------------------|
| I   | A   | X(I->A)                 | Y(A->I)                    |
| --- | --- | -----                   | -----                      |
| 45  | 58  | 0.148840                | 0.000000                   |
| 47  | 58  | 0.248460                | 0.000000                   |
| 51  | 58  | 0.167600                | 0.000000                   |
| 52  | 58  | -0.217770               | 0.000000                   |
| 55  | 60  | 0.318510                | 0.000000                   |
| 55  | 61  | 0.132570                | 0.000000                   |
| 56  | 59  | 0.144670                | 0.000000                   |
| 56  | 60  | -0.201870               | 0.000000                   |
| 56  | 61  | -0.246400               | 0.000000                   |

STATE # 18 ENERGY = 7.726200 EV  
 OSCILLATOR STRENGTH = 0.021400

| OCC | VIR | EXCITATION<br>AMPLITUDE | DE-EXCITATION<br>AMPLITUDE |
|-----|-----|-------------------------|----------------------------|
| I   | A   | X(I->A)                 | Y(A->I)                    |
| --- | --- | -----                   | -----                      |
| 47  | 62  | 0.104780                | 0.000000                   |
| 50  | 60  | -0.113090               | 0.000000                   |
| 51  | 58  | 0.163390                | 0.000000                   |
| 51  | 60  | -0.100910               | 0.000000                   |



|    |    |           |          |
|----|----|-----------|----------|
| 52 | 58 | -0.157330 | 0.000000 |
| 55 | 59 | 0.127030  | 0.000000 |
| 55 | 60 | -0.125450 | 0.000000 |
| 55 | 61 | 0.438910  | 0.000000 |
| 56 | 60 | 0.252450  | 0.000000 |
| 57 | 60 | -0.120630 | 0.000000 |

STATE # 19 ENERGY = 7.859900 EV  
 OSCILLATOR STRENGTH = 0.004500

| OCC | VIR | EXCITATION | DE-EXCITATION |
|-----|-----|------------|---------------|
|     |     | AMPLITUDE  | AMPLITUDE     |
| I   | A   | X(I->A)    | Y(A->I)       |
| --- | --- | -----      | -----         |
| 44  | 58  | -0.101070  | 0.000000      |
| 45  | 58  | -0.103420  | 0.000000      |
| 46  | 58  | 0.125120   | 0.000000      |
| 50  | 58  | 0.210810   | 0.000000      |
| 51  | 58  | -0.167500  | 0.000000      |
| 52  | 58  | 0.231860   | 0.000000      |
| 53  | 58  | 0.144470   | 0.000000      |
| 54  | 59  | 0.163970   | 0.000000      |
| 55  | 61  | 0.328740   | 0.000000      |
| 56  | 60  | -0.233400  | 0.000000      |
| 57  | 62  | -0.260380  | 0.000000      |

STATE # 20 ENERGY = 7.879100 EV  
 OSCILLATOR STRENGTH = 0.108300

| OCC | VIR | EXCITATION | DE-EXCITATION |
|-----|-----|------------|---------------|
|     |     | AMPLITUDE  | AMPLITUDE     |
| I   | A   | X(I->A)    | Y(A->I)       |
| --- | --- | -----      | -----         |
| 45  | 58  | -0.228950  | 0.000000      |
| 47  | 58  | -0.130220  | 0.000000      |
| 55  | 59  | 0.102730   | 0.000000      |
| 55  | 60  | 0.384790   | 0.000000      |
| 56  | 60  | 0.144830   | 0.000000      |
| 56  | 61  | 0.327990   | 0.000000      |
| 56  | 62  | 0.137540   | 0.000000      |

STATE # 21 ENERGY = 7.910800 EV  
 OSCILLATOR STRENGTH = 0.027300

| OCC | VIR | EXCITATION | DE-EXCITATION |
|-----|-----|------------|---------------|
|     |     | AMPLITUDE  | AMPLITUDE     |
| I   | A   | X(I->A)    | Y(A->I)       |
| --- | --- | -----      | -----         |
| 48  | 58  | -0.140840  | 0.000000      |
| 50  | 58  | -0.211320  | 0.000000      |
| 51  | 58  | 0.179180   | 0.000000      |
| 52  | 58  | -0.143740  | 0.000000      |
| 53  | 58  | -0.106130  | 0.000000      |
| 54  | 59  | 0.193670   | 0.000000      |
| 56  | 59  | -0.146220  | 0.000000      |
| 56  | 60  | -0.278430  | 0.000000      |

|    |    |           |          |
|----|----|-----------|----------|
| 56 | 61 | 0.308070  | 0.000000 |
| 57 | 62 | -0.244100 | 0.000000 |

STATE # 22 ENERGY = 8.001700 EV  
 OSCILLATOR STRENGTH = 0.038600

| OCC | VIR | EXCITATION<br>AMPLITUDE | DE-EXCITATION<br>AMPLITUDE |
|-----|-----|-------------------------|----------------------------|
| I   | A   | X(I->A)                 | Y(A->I)                    |
| --- | --- | -----                   | -----                      |
| 43  | 58  | 0.164260                | 0.000000                   |
| 48  | 58  | -0.132140               | 0.000000                   |
| 54  | 59  | 0.492030                | 0.000000                   |
| 55  | 60  | 0.124350                | 0.000000                   |
| 55  | 62  | 0.121600                | 0.000000                   |
| 56  | 60  | 0.181180                | 0.000000                   |
| 56  | 61  | -0.123550               | 0.000000                   |
| 57  | 62  | 0.195560                | 0.000000                   |

STATE # 23 ENERGY = 8.082700 EV  
 OSCILLATOR STRENGTH = 0.026700

| OCC | VIR | EXCITATION<br>AMPLITUDE | DE-EXCITATION<br>AMPLITUDE |
|-----|-----|-------------------------|----------------------------|
| I   | A   | X(I->A)                 | Y(A->I)                    |
| --- | --- | -----                   | -----                      |
| 42  | 58  | 0.208310                | 0.000000                   |
| 44  | 58  | 0.124920                | 0.000000                   |
| 45  | 58  | 0.130890                | 0.000000                   |
| 46  | 59  | -0.156870               | 0.000000                   |
| 51  | 59  | 0.310620                | 0.000000                   |
| 52  | 59  | 0.271780                | 0.000000                   |
| 53  | 59  | 0.229300                | 0.000000                   |
| 57  | 63  | -0.235780               | 0.000000                   |

STATE # 24 ENERGY = 8.126400 EV  
 OSCILLATOR STRENGTH = 0.061200

| OCC | VIR | EXCITATION<br>AMPLITUDE | DE-EXCITATION<br>AMPLITUDE |
|-----|-----|-------------------------|----------------------------|
| I   | A   | X(I->A)                 | Y(A->I)                    |
| --- | --- | -----                   | -----                      |
| 43  | 58  | 0.120060                | 0.000000                   |
| 44  | 58  | 0.232240                | 0.000000                   |
| 45  | 58  | 0.467790                | 0.000000                   |
| 51  | 59  | -0.118770               | 0.000000                   |
| 52  | 58  | 0.136450                | 0.000000                   |
| 52  | 59  | -0.123200               | 0.000000                   |
| 53  | 59  | -0.106040               | 0.000000                   |
| 55  | 60  | 0.142890                | 0.000000                   |
| 56  | 61  | 0.175640                | 0.000000                   |

STATE # 25 ENERGY = 8.170700 EV  
 OSCILLATOR STRENGTH = 0.013600

| OCC | VIR | EXCITATION<br>AMPLITUDE | DE-EXCITATION<br>AMPLITUDE |
|-----|-----|-------------------------|----------------------------|
|-----|-----|-------------------------|----------------------------|

| I   | A   | X(I->A)   | Y(A->I)  |
|-----|-----|-----------|----------|
| --- | --- | -----     | -----    |
| 43  | 58  | 0.396480  | 0.000000 |
| 44  | 58  | -0.240900 | 0.000000 |
| 46  | 58  | 0.256000  | 0.000000 |
| 47  | 58  | 0.133220  | 0.000000 |
| 50  | 58  | -0.170700 | 0.000000 |
| 54  | 59  | -0.207250 | 0.000000 |
| 55  | 60  | -0.145920 | 0.000000 |
| 55  | 61  | -0.156670 | 0.000000 |

STATE # 26 ENERGY = 8.194800 EV  
 OSCILLATOR STRENGTH = 0.004500

| OCC | VIR | EXCITATION<br>AMPLITUDE | DE-EXCITATION<br>AMPLITUDE |
|-----|-----|-------------------------|----------------------------|
| I   | A   | X(I->A)                 | Y(A->I)                    |
| --- | --- | -----                   | -----                      |
| 46  | 59  | -0.102080               | 0.000000                   |
| 47  | 58  | -0.126520               | 0.000000                   |
| 50  | 59  | -0.174950               | 0.000000                   |
| 51  | 59  | 0.109980                | 0.000000                   |
| 52  | 59  | 0.152840                | 0.000000                   |
| 53  | 59  | 0.121330                | 0.000000                   |
| 57  | 63  | 0.548800                | 0.000000                   |

STATE # 27 ENERGY = 8.296300 EV  
 OSCILLATOR STRENGTH = 0.046800

| OCC | VIR | EXCITATION<br>AMPLITUDE | DE-EXCITATION<br>AMPLITUDE |
|-----|-----|-------------------------|----------------------------|
| I   | A   | X(I->A)                 | Y(A->I)                    |
| --- | --- | -----                   | -----                      |
| 41  | 58  | 0.225280                | 0.000000                   |
| 43  | 58  | 0.411610                | 0.000000                   |
| 46  | 58  | -0.217010               | 0.000000                   |
| 47  | 59  | 0.135570                | 0.000000                   |
| 48  | 58  | 0.105400                | 0.000000                   |
| 50  | 58  | 0.216240                | 0.000000                   |

STATE # 28 ENERGY = 8.412000 EV  
 OSCILLATOR STRENGTH = 0.082400

| OCC | VIR | EXCITATION<br>AMPLITUDE | DE-EXCITATION<br>AMPLITUDE |
|-----|-----|-------------------------|----------------------------|
| I   | A   | X(I->A)                 | Y(A->I)                    |
| --- | --- | -----                   | -----                      |
| 42  | 58  | 0.442090                | 0.000000                   |
| 46  | 59  | 0.107850                | 0.000000                   |
| 47  | 58  | 0.104830                | 0.000000                   |
| 50  | 59  | 0.245050                | 0.000000                   |
| 52  | 59  | -0.135070               | 0.000000                   |
| 54  | 61  | 0.119650                | 0.000000                   |
| 55  | 60  | -0.129980               | 0.000000                   |
| 57  | 63  | 0.170820                | 0.000000                   |

STATE # 29 ENERGY = 8.520500 EV  
 OSCILLATOR STRENGTH = 0.004900

| OCC<br>I | VIR<br>A | EXCITATION           | DE-EXCITATION        |
|----------|----------|----------------------|----------------------|
|          |          | AMPLITUDE<br>X(I->A) | AMPLITUDE<br>Y(A->I) |
| ---      | ---      | -----                | -----                |
| 42       | 58       | 0.276860             | 0.000000             |
| 45       | 58       | -0.110450            | 0.000000             |
| 47       | 60       | -0.100600            | 0.000000             |
| 47       | 62       | 0.145630             | 0.000000             |
| 50       | 60       | -0.112790            | 0.000000             |
| 51       | 60       | -0.261060            | 0.000000             |
| 51       | 61       | 0.122170             | 0.000000             |
| 54       | 60       | -0.108140            | 0.000000             |
| 54       | 61       | -0.112510            | 0.000000             |
| 54       | 62       | 0.122490             | 0.000000             |
| 55       | 60       | 0.230090             | 0.000000             |
| 55       | 61       | -0.141190            | 0.000000             |
| 56       | 60       | -0.139810            | 0.000000             |
| 56       | 62       | -0.109000            | 0.000000             |

STATE # 30 ENERGY = 8.575400 EV  
 OSCILLATOR STRENGTH = 0.009100

| OCC<br>I | VIR<br>A | EXCITATION           | DE-EXCITATION        |
|----------|----------|----------------------|----------------------|
|          |          | AMPLITUDE<br>X(I->A) | AMPLITUDE<br>Y(A->I) |
| ---      | ---      | -----                | -----                |
| 40       | 58       | 0.191650             | 0.000000             |
| 43       | 58       | -0.156540            | 0.000000             |
| 46       | 58       | 0.255160             | 0.000000             |
| 47       | 58       | 0.112050             | 0.000000             |
| 47       | 59       | 0.161670             | 0.000000             |
| 47       | 60       | 0.102140             | 0.000000             |
| 48       | 58       | -0.145250            | 0.000000             |
| 49       | 59       | -0.177780            | 0.000000             |
| 51       | 61       | 0.131460             | 0.000000             |
| 52       | 59       | 0.110450             | 0.000000             |
| 53       | 59       | -0.168330            | 0.000000             |
| 54       | 60       | 0.169740             | 0.000000             |
| 54       | 61       | -0.133130            | 0.000000             |
| 55       | 61       | -0.132140            | 0.000000             |
| 57       | 62       | -0.104890            | 0.000000             |

**Inversion Ts for 4:**

**Table S4.**

TOTAL FREE ENERGY IN SOLVENT = -684.453041 A.U.

|   |             |             |             |
|---|-------------|-------------|-------------|
| N | -0.87701600 | 1.57330800  | -0.05700100 |
| C | 0.38039400  | 1.32656700  | 0.05246300  |
| C | -1.93595100 | 0.68582400  | -0.03303900 |
| C | 1.12906400  | 0.00000600  | 0.29182400  |
| C | -1.93594700 | -0.68582900 | -0.03304000 |
| N | -0.87700900 | -1.57330700 | -0.05700000 |

|   |             |             |             |
|---|-------------|-------------|-------------|
| C | 0.38040000  | -1.32656000 | 0.05246400  |
| C | 1.24554500  | 2.56868900  | 0.01751800  |
| C | 1.24555800  | -2.56867600 | 0.01752100  |
| C | -3.20823800 | 1.36834000  | -0.02061000 |
| N | -4.21690600 | 1.94761600  | -0.00625500 |
| C | -3.20823100 | -1.36835100 | -0.02061200 |
| N | -4.21689600 | -1.94763200 | -0.00625700 |
| C | 2.52002900  | 0.00000700  | -0.44368700 |
| C | 3.73145700  | 0.00000300  | 0.49951500  |
| C | 5.06443700  | -0.00001100 | -0.25293400 |
| H | 2.10250200  | 2.49132600  | 0.69209800  |
| H | 1.63768300  | -2.74875600 | -0.98966400 |
| H | 1.35066200  | 0.00000600  | 1.37337300  |
| H | 2.58613500  | -0.86278700 | -1.10878900 |
| H | 2.58613500  | 0.86280300  | -1.10878700 |
| H | 3.68233100  | 0.87565300  | 1.15985300  |
| H | 3.68231800  | -0.87563800 | 1.15986300  |
| H | 5.15851000  | -0.88435000 | -0.89283300 |
| H | 5.15852400  | 0.88432100  | -0.89284100 |
| H | 5.90959900  | -0.00001500 | 0.44202200  |
| H | 2.10251800  | -2.49130400 | 0.69209800  |
| H | 0.63455800  | -3.42815600 | 0.29228300  |
| H | 1.63767200  | 2.74876600  | -0.98966700 |
| H | 0.63453800  | 3.42816600  | 0.29227400  |

Axial isomer of **4**:

Table S5.

TOTAL FREE ENERGY IN SOLVENT = -684.488174 A.U.

|   |             |             |             |
|---|-------------|-------------|-------------|
| N | 0.22560900  | -0.19426900 | 1.63495400  |
| C | -0.91195000 | 0.34946500  | 1.35141800  |
| C | 1.24527400  | -0.36407700 | 0.73393300  |
| C | -1.37115300 | 0.66745600  | -0.06807600 |
| C | 1.53510100  | 0.47175700  | -0.33736100 |
| N | 0.84858600  | 1.60740800  | -0.68354400 |
| C | -0.41795000 | 1.77876500  | -0.49255400 |
| C | -1.83232900 | 0.71186600  | 2.48049700  |
| C | -0.99338500 | 3.15090200  | -0.69030600 |
| C | 2.17333600  | -1.40944100 | 1.08081900  |
| N | 2.89417400  | -2.27834400 | 1.36033800  |
| C | 2.75685100  | 0.27237800  | -1.07333000 |
| N | 3.72353400  | 0.11201800  | -1.69993200 |
| C | -1.44712100 | -0.53617100 | -1.03765600 |
| C | -2.47686200 | -1.58601300 | -0.59797000 |
| C | -2.59905800 | -2.73840100 | -1.59929100 |
| H | -2.05467300 | 1.78530500  | 2.45941900  |
| H | -1.76706900 | 3.12698100  | -1.46683200 |
| H | -2.37593300 | 1.09589400  | -0.00426600 |
| H | -1.72397600 | -0.14132100 | -2.02265800 |
| H | -0.47145900 | -1.01213500 | -1.15945400 |
| H | -2.19638900 | -1.98675000 | 0.38433400  |
| H | -3.45554800 | -1.10504800 | -0.46934500 |
| H | -2.90958400 | -2.37544400 | -2.58525900 |

|   |             |             |             |
|---|-------------|-------------|-------------|
| H | -1.64326100 | -3.25922600 | -1.72217600 |
| H | -3.33841100 | -3.47279600 | -1.26553600 |
| H | -1.48247100 | 3.49698100  | 0.22806700  |
| H | -0.21461700 | 3.85971700  | -0.97124100 |
| H | -2.79046800 | 0.19104500  | 2.37055200  |
| H | -1.38398200 | 0.45819500  | 3.44094600  |

Table S6.

**TD-DFT output**

HOMO: 57, LUMO: 58

STATE # 1 ENERGY = 4.201300 EV  
 OSCILLATOR STRENGTH = 0.252200

| OCC | VIR | EXCITATION | DE-EXCITATION |
|-----|-----|------------|---------------|
|     |     | AMPLITUDE  | AMPLITUDE     |
| I   | A   | X(I->A)    | Y(A->I)       |
| --- | --- | -----      | -----         |
| 55  | 58  | 0.228580   | 0.000000      |
| 56  | 58  | 0.171110   | 0.000000      |
| 56  | 59  | -0.119570  | 0.000000      |
| 57  | 58  | 0.602510   | 0.000000      |

STATE # 2 ENERGY = 4.847000 EV  
 OSCILLATOR STRENGTH = 0.081600

| OCC | VIR | EXCITATION | DE-EXCITATION |
|-----|-----|------------|---------------|
|     |     | AMPLITUDE  | AMPLITUDE     |
| I   | A   | X(I->A)    | Y(A->I)       |
| --- | --- | -----      | -----         |
| 55  | 58  | -0.210530  | 0.000000      |
| 55  | 59  | -0.175510  | 0.000000      |
| 56  | 58  | 0.480050   | 0.000000      |
| 56  | 59  | -0.140560  | 0.000000      |
| 56  | 61  | -0.127170  | 0.000000      |
| 57  | 59  | -0.342630  | 0.000000      |

STATE # 3 ENERGY = 4.950300 EV  
 OSCILLATOR STRENGTH = 0.119600

| OCC | VIR | EXCITATION | DE-EXCITATION |
|-----|-----|------------|---------------|
|     |     | AMPLITUDE  | AMPLITUDE     |
| I   | A   | X(I->A)    | Y(A->I)       |
| --- | --- | -----      | -----         |
| 55  | 58  | 0.490970   | 0.000000      |
| 56  | 58  | 0.353910   | 0.000000      |
| 57  | 58  | -0.281320  | 0.000000      |
| 57  | 59  | 0.168870   | 0.000000      |

STATE # 4 ENERGY = 5.034000 EV  
 OSCILLATOR STRENGTH = 0.018300

| OCC | VIR | EXCITATION | DE-EXCITATION |
|-----|-----|------------|---------------|
|     |     | AMPLITUDE  | AMPLITUDE     |
| I   | A   | X(I->A)    | Y(A->I)       |
| --- | --- | -----      | -----         |

|    |    |           |          |
|----|----|-----------|----------|
| 55 | 58 | -0.362340 | 0.000000 |
| 56 | 58 | 0.273490  | 0.000000 |
| 57 | 59 | 0.513940  | 0.000000 |

STATE # 5 ENERGY = 5.863200 EV  
 OSCILLATOR STRENGTH = 0.040900

| OCC | VIR | EXCITATION<br>AMPLITUDE | DE-EXCITATION<br>AMPLITUDE |
|-----|-----|-------------------------|----------------------------|
| I   | A   | X(I->A)                 | Y(A->I)                    |
| --- | --- | -----                   | -----                      |
| 54  | 59  | -0.134050               | 0.000000                   |
| 55  | 59  | -0.286470               | 0.000000                   |
| 55  | 61  | 0.153390                | 0.000000                   |
| 56  | 59  | 0.414490                | 0.000000                   |
| 56  | 61  | 0.137510                | 0.000000                   |
| 57  | 58  | 0.130850                | 0.000000                   |
| 57  | 61  | 0.343940                | 0.000000                   |

STATE # 6 ENERGY = 5.973800 EV  
 OSCILLATOR STRENGTH = 0.007000

| OCC | VIR | EXCITATION<br>AMPLITUDE | DE-EXCITATION<br>AMPLITUDE |
|-----|-----|-------------------------|----------------------------|
| I   | A   | X(I->A)                 | Y(A->I)                    |
| --- | --- | -----                   | -----                      |
| 52  | 58  | -0.105860               | 0.000000                   |
| 53  | 58  | 0.144970                | 0.000000                   |
| 54  | 58  | 0.526390                | 0.000000                   |
| 55  | 59  | -0.287230               | 0.000000                   |
| 56  | 59  | -0.199040               | 0.000000                   |
| 57  | 60  | -0.149280               | 0.000000                   |

STATE # 7 ENERGY = 6.034900 EV  
 OSCILLATOR STRENGTH = 0.006500

| OCC | VIR | EXCITATION<br>AMPLITUDE | DE-EXCITATION<br>AMPLITUDE |
|-----|-----|-------------------------|----------------------------|
| I   | A   | X(I->A)                 | Y(A->I)                    |
| --- | --- | -----                   | -----                      |
| 54  | 58  | 0.146730                | 0.000000                   |
| 57  | 60  | 0.642360                | 0.000000                   |

STATE # 8 ENERGY = 6.462600 EV  
 OSCILLATOR STRENGTH = 0.007800

| OCC | VIR | EXCITATION<br>AMPLITUDE | DE-EXCITATION<br>AMPLITUDE |
|-----|-----|-------------------------|----------------------------|
| I   | A   | X(I->A)                 | Y(A->I)                    |
| --- | --- | -----                   | -----                      |
| 55  | 59  | 0.149120                | 0.000000                   |
| 56  | 59  | -0.316740               | 0.000000                   |
| 57  | 61  | 0.542600                | 0.000000                   |

STATE # 9 ENERGY = 6.476700 EV  
 OSCILLATOR STRENGTH = 0.081000

| OCC | VIR | EXCITATION<br>AMPLITUDE | DE-EXCITATION<br>AMPLITUDE |
|-----|-----|-------------------------|----------------------------|
| I   | A   | X(I->A)                 | Y(A->I)                    |
| --- | --- | -----                   | -----                      |

| OCC | VIR | AMPLITUDE | AMPLITUDE |
|-----|-----|-----------|-----------|
| I   | A   | X(I->A)   | Y(A->I)   |
| --- | --- | -----     | -----     |
| 49  | 58  | 0.267860  | 0.000000  |
| 50  | 58  | 0.423330  | 0.000000  |
| 52  | 58  | 0.113510  | 0.000000  |
| 55  | 59  | -0.310290 | 0.000000  |
| 56  | 59  | -0.128700 | 0.000000  |
| 57  | 59  | 0.113030  | 0.000000  |
| 57  | 60  | 0.155670  | 0.000000  |
| 57  | 61  | -0.100590 | 0.000000  |

STATE # 10 ENERGY = 6.671300 EV

OSCILLATOR STRENGTH = 0.000500

|     |     | EXCITATION | DE-EXCITATION |
|-----|-----|------------|---------------|
| OCC | VIR | AMPLITUDE  | AMPLITUDE     |
| I   | A   | X(I->A)    | Y(A->I)       |
| --- | --- | -----      | -----         |
| 46  | 58  | -0.110770  | 0.000000      |
| 48  | 58  | 0.563930   | 0.000000      |
| 48  | 61  | 0.124390   | 0.000000      |
| 49  | 58  | 0.220360   | 0.000000      |
| 50  | 58  | -0.141210  | 0.000000      |
| 50  | 63  | -0.105070  | 0.000000      |
| 52  | 58  | 0.100730   | 0.000000      |

STATE # 11 ENERGY = 6.744600 EV

OSCILLATOR STRENGTH = 0.048700

|     |     | EXCITATION | DE-EXCITATION |
|-----|-----|------------|---------------|
| OCC | VIR | AMPLITUDE  | AMPLITUDE     |
| I   | A   | X(I->A)    | Y(A->I)       |
| --- | --- | -----      | -----         |
| 48  | 58  | 0.169510   | 0.000000      |
| 49  | 58  | -0.174920  | 0.000000      |
| 50  | 58  | 0.105570   | 0.000000      |
| 50  | 60  | -0.128500  | 0.000000      |
| 51  | 58  | 0.434310   | 0.000000      |
| 52  | 58  | -0.336970  | 0.000000      |
| 53  | 58  | 0.128010   | 0.000000      |
| 54  | 58  | -0.143230  | 0.000000      |

STATE # 12 ENERGY = 6.808500 EV

OSCILLATOR STRENGTH = 0.707800

|     |     | EXCITATION | DE-EXCITATION |
|-----|-----|------------|---------------|
| OCC | VIR | AMPLITUDE  | AMPLITUDE     |
| I   | A   | X(I->A)    | Y(A->I)       |
| --- | --- | -----      | -----         |
| 48  | 60  | -0.114920  | 0.000000      |
| 49  | 58  | 0.134400   | 0.000000      |
| 50  | 58  | 0.353100   | 0.000000      |
| 51  | 58  | 0.122480   | 0.000000      |
| 53  | 58  | 0.109610   | 0.000000      |
| 54  | 58  | 0.296790   | 0.000000      |



|    |    |           |          |
|----|----|-----------|----------|
| 55 | 59 | 0.262780  | 0.000000 |
| 56 | 59 | 0.188210  | 0.000000 |
| 57 | 59 | -0.188850 | 0.000000 |

STATE # 13 ENERGY = 7.101700 EV  
 OSCILLATOR STRENGTH = 0.009000

| OCC | VIR | EXCITATION<br>AMPLITUDE | DE-EXCITATION<br>AMPLITUDE |
|-----|-----|-------------------------|----------------------------|
| I   | A   | X(I->A)                 | Y(A->I)                    |
| --- | --- | -----                   | -----                      |
| 46  | 58  | -0.201830               | 0.000000                   |
| 47  | 58  | -0.155020               | 0.000000                   |
| 51  | 58  | -0.212770               | 0.000000                   |
| 53  | 58  | 0.571410                | 0.000000                   |
| 54  | 58  | -0.152740               | 0.000000                   |

STATE # 14 ENERGY = 7.216200 EV  
 OSCILLATOR STRENGTH = 0.015700

| OCC | VIR | EXCITATION<br>AMPLITUDE | DE-EXCITATION<br>AMPLITUDE |
|-----|-----|-------------------------|----------------------------|
| I   | A   | X(I->A)                 | Y(A->I)                    |
| --- | --- | -----                   | -----                      |
| 45  | 58  | 0.164600                | 0.000000                   |
| 46  | 58  | 0.130630                | 0.000000                   |
| 47  | 58  | -0.169180               | 0.000000                   |
| 50  | 58  | -0.109770               | 0.000000                   |
| 51  | 58  | 0.328070                | 0.000000                   |
| 52  | 58  | 0.464110                | 0.000000                   |
| 53  | 58  | 0.137420                | 0.000000                   |
| 57  | 62  | 0.106910                | 0.000000                   |

STATE # 15 ENERGY = 7.310800 EV  
 OSCILLATOR STRENGTH = 0.008700

| OCC | VIR | EXCITATION<br>AMPLITUDE | DE-EXCITATION<br>AMPLITUDE |
|-----|-----|-------------------------|----------------------------|
| I   | A   | X(I->A)                 | Y(A->I)                    |
| --- | --- | -----                   | -----                      |
| 47  | 60  | 0.166020                | 0.000000                   |
| 48  | 58  | -0.131360               | 0.000000                   |
| 51  | 58  | -0.127460               | 0.000000                   |
| 54  | 60  | -0.127450               | 0.000000                   |
| 55  | 60  | 0.102180                | 0.000000                   |
| 55  | 61  | 0.111690                | 0.000000                   |
| 56  | 60  | -0.162870               | 0.000000                   |
| 57  | 61  | 0.104360                | 0.000000                   |
| 57  | 62  | 0.482030                | 0.000000                   |

STATE # 16 ENERGY = 7.390000 EV  
 OSCILLATOR STRENGTH = 0.048900

| OCC | VIR | EXCITATION<br>AMPLITUDE | DE-EXCITATION<br>AMPLITUDE |
|-----|-----|-------------------------|----------------------------|
| I   | A   | X(I->A)                 | Y(A->I)                    |
| --- | --- | -----                   | -----                      |

|    |    |           |          |
|----|----|-----------|----------|
| 42 | 58 | 0.102500  | 0.000000 |
| 47 | 58 | 0.127760  | 0.000000 |
| 48 | 58 | -0.143670 | 0.000000 |
| 49 | 58 | 0.452260  | 0.000000 |
| 50 | 58 | -0.231230 | 0.000000 |
| 51 | 58 | 0.181850  | 0.000000 |
| 52 | 58 | -0.135260 | 0.000000 |
| 53 | 58 | 0.181100  | 0.000000 |
| 56 | 59 | 0.100680  | 0.000000 |

STATE # 17 ENERGY = 7.522000 EV

OSCILLATOR STRENGTH = 0.067400

| OCC | VIR | EXCITATION<br>AMPLITUDE | DE-EXCITATION<br>AMPLITUDE |
|-----|-----|-------------------------|----------------------------|
| I   | A   | X(I->A)                 | Y(A->I)                    |
| --- | --- | -----                   | -----                      |
| 45  | 58  | 0.190730                | 0.000000                   |
| 46  | 58  | -0.224080               | 0.000000                   |
| 47  | 58  | 0.402340                | 0.000000                   |
| 48  | 60  | 0.150810                | 0.000000                   |
| 49  | 58  | -0.146320               | 0.000000                   |
| 52  | 58  | 0.196790                | 0.000000                   |
| 55  | 59  | 0.150160                | 0.000000                   |
| 56  | 59  | 0.118770                | 0.000000                   |
| 56  | 61  | -0.176990               | 0.000000                   |

STATE # 18 ENERGY = 7.656400 EV

OSCILLATOR STRENGTH = 0.004200

| OCC | VIR | EXCITATION<br>AMPLITUDE | DE-EXCITATION<br>AMPLITUDE |
|-----|-----|-------------------------|----------------------------|
| I   | A   | X(I->A)                 | Y(A->I)                    |
| --- | --- | -----                   | -----                      |
| 47  | 58  | -0.114110               | 0.000000                   |
| 47  | 62  | -0.109040               | 0.000000                   |
| 51  | 60  | -0.145480               | 0.000000                   |
| 52  | 60  | 0.118210                | 0.000000                   |
| 55  | 60  | 0.393540                | 0.000000                   |
| 55  | 61  | 0.118030                | 0.000000                   |
| 56  | 60  | 0.334310                | 0.000000                   |
| 56  | 61  | -0.242520               | 0.000000                   |
| 56  | 62  | 0.105830                | 0.000000                   |
| 57  | 60  | 0.120280                | 0.000000                   |

STATE # 19 ENERGY = 7.728300 EV

OSCILLATOR STRENGTH = 0.034100

| OCC | VIR | EXCITATION<br>AMPLITUDE | DE-EXCITATION<br>AMPLITUDE |
|-----|-----|-------------------------|----------------------------|
| I   | A   | X(I->A)                 | Y(A->I)                    |
| --- | --- | -----                   | -----                      |
| 43  | 58  | -0.139690               | 0.000000                   |
| 55  | 59  | 0.128990                | 0.000000                   |
| 55  | 61  | 0.455000                | 0.000000                   |
| 56  | 59  | -0.156580               | 0.000000                   |

|    |    |           |          |
|----|----|-----------|----------|
| 56 | 61 | 0.342580  | 0.000000 |
| 57 | 62 | -0.169240 | 0.000000 |

STATE # 20 ENERGY = 7.850600 EV  
 OSCILLATOR STRENGTH = 0.066100

| OCC | VIR | EXCITATION<br>AMPLITUDE | DE-EXCITATION<br>AMPLITUDE |
|-----|-----|-------------------------|----------------------------|
| I   | A   | X(I->A)                 | Y(A->I)                    |
| --- | --- | -----                   | -----                      |
| 44  | 58  | 0.195520                | 0.000000                   |
| 45  | 58  | 0.271160                | 0.000000                   |
| 46  | 58  | -0.124950               | 0.000000                   |
| 55  | 60  | 0.130140                | 0.000000                   |
| 55  | 61  | -0.300650               | 0.000000                   |
| 56  | 60  | 0.184290                | 0.000000                   |
| 56  | 61  | 0.342140                | 0.000000                   |
| 56  | 62  | 0.106730                | 0.000000                   |

STATE # 21 ENERGY = 7.853900 EV  
 OSCILLATOR STRENGTH = 0.005800

| OCC | VIR | EXCITATION<br>AMPLITUDE | DE-EXCITATION<br>AMPLITUDE |
|-----|-----|-------------------------|----------------------------|
| I   | A   | X(I->A)                 | Y(A->I)                    |
| --- | --- | -----                   | -----                      |
| 47  | 60  | -0.108420               | 0.000000                   |
| 54  | 59  | -0.136450               | 0.000000                   |
| 55  | 60  | -0.350420               | 0.000000                   |
| 55  | 62  | 0.109640                | 0.000000                   |
| 56  | 60  | 0.387450                | 0.000000                   |
| 57  | 62  | 0.327510                | 0.000000                   |

STATE # 22 ENERGY = 8.019700 EV  
 OSCILLATOR STRENGTH = 0.031500

| OCC | VIR | EXCITATION<br>AMPLITUDE | DE-EXCITATION<br>AMPLITUDE |
|-----|-----|-------------------------|----------------------------|
| I   | A   | X(I->A)                 | Y(A->I)                    |
| --- | --- | -----                   | -----                      |
| 44  | 58  | -0.307850               | 0.000000                   |
| 47  | 58  | -0.167690               | 0.000000                   |
| 48  | 60  | 0.153560                | 0.000000                   |
| 51  | 59  | 0.196330                | 0.000000                   |
| 54  | 59  | -0.145770               | 0.000000                   |
| 57  | 63  | 0.410360                | 0.000000                   |

STATE # 23 ENERGY = 8.038600 EV  
 OSCILLATOR STRENGTH = 0.037200

| OCC | VIR | EXCITATION<br>AMPLITUDE | DE-EXCITATION<br>AMPLITUDE |
|-----|-----|-------------------------|----------------------------|
| I   | A   | X(I->A)                 | Y(A->I)                    |
| --- | --- | -----                   | -----                      |
| 43  | 58  | -0.205920               | 0.000000                   |
| 44  | 58  | -0.265740               | 0.000000                   |
| 45  | 58  | -0.252120               | 0.000000                   |

|    |    |          |          |
|----|----|----------|----------|
| 47 | 58 | 0.159360 | 0.000000 |
| 54 | 59 | 0.367130 | 0.000000 |
| 56 | 61 | 0.192210 | 0.000000 |

STATE # 24 ENERGY = 8.069800 EV  
 OSCILLATOR STRENGTH = 0.066700

| OCC | VIR | EXCITATION<br>AMPLITUDE | DE-EXCITATION<br>AMPLITUDE |
|-----|-----|-------------------------|----------------------------|
| I   | A   | X(I->A)                 | Y(A->I)                    |
| --- | --- | -----                   | -----                      |
| 43  | 58  | -0.130130               | 0.000000                   |
| 44  | 58  | 0.263700                | 0.000000                   |
| 45  | 58  | 0.174660                | 0.000000                   |
| 47  | 58  | -0.211710               | 0.000000                   |
| 52  | 59  | -0.160380               | 0.000000                   |
| 53  | 59  | 0.116850                | 0.000000                   |
| 54  | 59  | 0.347720                | 0.000000                   |
| 55  | 60  | -0.145790               | 0.000000                   |
| 55  | 61  | 0.175380                | 0.000000                   |
| 57  | 63  | 0.125320                | 0.000000                   |

STATE # 25 ENERGY = 8.115700 EV  
 OSCILLATOR STRENGTH = 0.034600

| OCC | VIR | EXCITATION<br>AMPLITUDE | DE-EXCITATION<br>AMPLITUDE |
|-----|-----|-------------------------|----------------------------|
| I   | A   | X(I->A)                 | Y(A->I)                    |
| --- | --- | -----                   | -----                      |
| 42  | 58  | 0.105150                | 0.000000                   |
| 44  | 58  | 0.322880                | 0.000000                   |
| 45  | 58  | -0.108220               | 0.000000                   |
| 46  | 58  | 0.221840                | 0.000000                   |
| 47  | 58  | 0.113630                | 0.000000                   |
| 51  | 59  | -0.113350               | 0.000000                   |
| 53  | 58  | 0.109820                | 0.000000                   |
| 57  | 63  | 0.425000                | 0.000000                   |

STATE # 26 ENERGY = 8.164100 EV  
 OSCILLATOR STRENGTH = 0.005100

| OCC | VIR | EXCITATION<br>AMPLITUDE | DE-EXCITATION<br>AMPLITUDE |
|-----|-----|-------------------------|----------------------------|
| I   | A   | X(I->A)                 | Y(A->I)                    |
| --- | --- | -----                   | -----                      |
| 43  | 58  | 0.578560                | 0.000000                   |
| 43  | 61  | 0.100230                | 0.000000                   |
| 51  | 59  | -0.125830               | 0.000000                   |
| 54  | 59  | 0.186600                | 0.000000                   |
| 55  | 61  | 0.143530                | 0.000000                   |
| 56  | 61  | 0.110090                | 0.000000                   |
| 57  | 63  | 0.126790                | 0.000000                   |

STATE # 27 ENERGY = 8.238500 EV  
 OSCILLATOR STRENGTH = 0.013500

| EXCITATION | DE-EXCITATION |
|------------|---------------|
|------------|---------------|

| OCC | VIR | AMPLITUDE | AMPLITUDE |
|-----|-----|-----------|-----------|
| I   | A   | X(I->A)   | Y(A->I)   |
| --- | --- | -----     | -----     |
| 43  | 58  | 0.116620  | 0.000000  |
| 45  | 58  | 0.148140  | 0.000000  |
| 46  | 58  | 0.409030  | 0.000000  |
| 47  | 58  | 0.110680  | 0.000000  |
| 48  | 58  | 0.136710  | 0.000000  |
| 49  | 59  | 0.115280  | 0.000000  |
| 51  | 58  | -0.156630 | 0.000000  |
| 51  | 59  | 0.221430  | 0.000000  |
| 52  | 59  | -0.207610 | 0.000000  |
| 53  | 58  | 0.112310  | 0.000000  |

STATE # 28 ENERGY = 8.316800 EV

OSCILLATOR STRENGTH = 0.082700

|     |     | EXCITATION | DE-EXCITATION |
|-----|-----|------------|---------------|
| OCC | VIR | AMPLITUDE  | AMPLITUDE     |
| I   | A   | X(I->A)    | Y(A->I)       |
| --- | --- | -----      | -----         |
| 44  | 58  | 0.184830   | 0.000000      |
| 45  | 58  | -0.219640  | 0.000000      |
| 45  | 59  | 0.101550   | 0.000000      |
| 46  | 59  | 0.165470   | 0.000000      |
| 48  | 59  | 0.115230   | 0.000000      |
| 49  | 59  | 0.158330   | 0.000000      |
| 50  | 59  | -0.131830  | 0.000000      |
| 51  | 59  | 0.455480   | 0.000000      |
| 53  | 59  | -0.192940  | 0.000000      |

STATE # 29 ENERGY = 8.379200 EV

OSCILLATOR STRENGTH = 0.003500

|     |     | EXCITATION | DE-EXCITATION |
|-----|-----|------------|---------------|
| OCC | VIR | AMPLITUDE  | AMPLITUDE     |
| I   | A   | X(I->A)    | Y(A->I)       |
| --- | --- | -----      | -----         |
| 45  | 58  | -0.202420  | 0.000000      |
| 46  | 59  | -0.129280  | 0.000000      |
| 51  | 59  | 0.103170   | 0.000000      |
| 53  | 59  | 0.571800   | 0.000000      |
| 54  | 59  | -0.113180  | 0.000000      |

STATE # 30 ENERGY = 8.447400 EV

OSCILLATOR STRENGTH = 0.042600

|     |     | EXCITATION | DE-EXCITATION |
|-----|-----|------------|---------------|
| OCC | VIR | AMPLITUDE  | AMPLITUDE     |
| I   | A   | X(I->A)    | Y(A->I)       |
| --- | --- | -----      | -----         |
| 45  | 58  | 0.163290   | 0.000000      |
| 46  | 58  | 0.104630   | 0.000000      |
| 47  | 59  | -0.107520  | 0.000000      |
| 47  | 62  | 0.118260   | 0.000000      |
| 49  | 60  | -0.157030  | 0.000000      |

|    |    |           |          |
|----|----|-----------|----------|
| 50 | 60 | 0.163700  | 0.000000 |
| 51 | 60 | 0.174320  | 0.000000 |
| 52 | 59 | 0.252760  | 0.000000 |
| 54 | 59 | 0.115310  | 0.000000 |
| 54 | 60 | -0.113440 | 0.000000 |
| 54 | 61 | 0.123670  | 0.000000 |
| 54 | 62 | -0.114450 | 0.000000 |
| 55 | 60 | 0.189000  | 0.000000 |
| 56 | 60 | 0.182950  | 0.000000 |

**A conformer of 5a:**

**Table S7.**

TOTAL FREE ENERGY IN SOLVENT = -1136.860193 A.U.

|   |             |             |             |
|---|-------------|-------------|-------------|
| N | 2.71027600  | -1.51093800 | -0.14176900 |
| C | 1.55064400  | -1.20206600 | 0.37437100  |
| C | 3.80219700  | -0.69973600 | -0.05400500 |
| C | 1.41502600  | -0.00000700 | 1.28692900  |
| C | 3.80220500  | 0.69970900  | -0.05399500 |
| N | 2.71029500  | 1.51092400  | -0.14175000 |
| C | 1.55065800  | 1.20205800  | 0.37438200  |
| C | 5.06128600  | 1.39155600  | -0.17048600 |
| N | 6.06663500  | 1.97250000  | -0.23579100 |
| C | 5.06126900  | -1.39159700 | -0.17050800 |
| N | 6.06661100  | -1.97255200 | -0.23582300 |
| C | 0.43522100  | -2.05829300 | 0.01057300  |
| C | -0.82179500 | -1.98214700 | 0.50141200  |
| C | 0.43524500  | 2.05830000  | 0.01058800  |
| C | -0.82178100 | 1.98214500  | 0.50140100  |
| C | -3.01135300 | 4.58408900  | -1.15664100 |
| C | -1.88819800 | 3.80603300  | -0.89662200 |
| C | -1.94133600 | 2.85064800  | 0.13414500  |
| C | -4.21938800 | 3.57196800  | 0.49693200  |
| C | -3.15282000 | 2.74247000  | 0.83678500  |
| C | -4.21939700 | -3.57198200 | 0.49697800  |
| C | -3.15282100 | -2.74249600 | 0.83683500  |
| C | -1.94135900 | -2.85063700 | 0.13415100  |
| C | -3.01141200 | -4.58401800 | -1.15668400 |
| C | -1.88825200 | -3.80597100 | -0.89666400 |
| H | 0.69912000  | -2.82367100 | -0.71284700 |
| H | -1.05996800 | -1.23434300 | 1.25275300  |
| H | 0.69916000  | 2.82369400  | -0.71280900 |
| H | -1.05997200 | 1.23431600  | 1.25271200  |
| H | 0.48637700  | -0.00000400 | 1.85251600  |
| H | 2.25029100  | -0.00001500 | 1.99650700  |
| H | -2.98213200 | 5.32557500  | -1.95201900 |
| H | -0.99586300 | 3.94210900  | -1.49713700 |
| H | -5.16016800 | 3.49636300  | 1.03805500  |
| H | -3.26105200 | 2.02276400  | 1.64247400  |
| H | -5.16016000 | -3.49640700 | 1.03813500  |
| H | -3.26103000 | -2.02282900 | 1.64256200  |
| H | -2.98221500 | -5.32546500 | -1.95210000 |
| H | -0.99593700 | -3.94201300 | -1.49721600 |

|   |             |             |             |
|---|-------------|-------------|-------------|
| N | -4.16831800 | -4.48524100 | -0.48178100 |
| N | -4.16828000 | 4.48527400  | -0.48178000 |

**B conformer of 5a:**

**Table S8.**

TOTAL FREE ENERGY IN SOLVENT = -1136.862906 A.U.

|   |             |             |             |
|---|-------------|-------------|-------------|
| N | -2.15964300 | 0.15456900  | 1.51209700  |
| C | -1.13700600 | 0.89856000  | 1.19148500  |
| C | -3.24040600 | -0.00442500 | 0.70152400  |
| C | -1.21181200 | 1.82992900  | 0.00000000  |
| C | -3.24040600 | -0.00442500 | -0.70152400 |
| N | -2.15964300 | 0.15456900  | -1.51209700 |
| C | -1.13700600 | 0.89856000  | -1.19148500 |
| C | 0.09787400  | 0.82910800  | 1.96119600  |
| C | 0.28264700  | -0.03127600 | 2.98749900  |
| C | 0.09787400  | 0.82910800  | -1.96119600 |
| C | 0.28264700  | -0.03127600 | -2.98749900 |
| C | 2.62394400  | -1.21690400 | -5.66287300 |
| C | 1.49080100  | -1.09686000 | -4.86083100 |
| C | 1.47400300  | -0.14712300 | -3.82561300 |
| C | 3.70886100  | 0.43771200  | -4.52008400 |
| C | 2.63072200  | 0.63778600  | -3.66517400 |
| C | 2.62394400  | -1.21690400 | 5.66287300  |
| C | 1.49080100  | -1.09686000 | 4.86083100  |
| C | 1.47400300  | -0.14712300 | 3.82561300  |
| C | 3.70886100  | 0.43771200  | 4.52008400  |
| C | 2.63072200  | 0.63778600  | 3.66517400  |
| C | -4.44497400 | -0.39488000 | 1.39054600  |
| N | -5.41140600 | -0.68234700 | 1.97025800  |
| C | -4.44497400 | -0.39488000 | -1.39054600 |
| N | -5.41140600 | -0.68234700 | -1.97025800 |
| H | 0.87760400  | 1.52647300  | 1.67132600  |
| H | -0.53534700 | -0.70659700 | 3.22799400  |
| H | 0.87760400  | 1.52647300  | -1.67132600 |
| H | -0.53534700 | -0.70659700 | -3.22799400 |
| H | -2.17678500 | 2.34903000  | 0.00000000  |
| H | 2.64522100  | -1.94944400 | -6.46691700 |
| H | 0.62917700  | -1.73322400 | -5.03707100 |
| H | 4.60861100  | 1.03847400  | -4.40574700 |
| H | 2.69884000  | 1.39432600  | -2.89118000 |
| H | 2.64522100  | -1.94944400 | 6.46691700  |
| H | 0.62917700  | -1.73322400 | 5.03707100  |
| H | 4.60861100  | 1.03847400  | 4.40574700  |
| H | 2.69884000  | 1.39432600  | 2.89118000  |
| H | -0.40389900 | 2.56191200  | 0.00000000  |
| N | 3.72574400  | -0.47014400 | -5.51002000 |
| N | 3.72574400  | -0.47014400 | 5.51002000  |

**Table S9.**

**TD-DFT output**

HOMO: 91, LUMO: 92

STATE # 1 ENERGY = 3.297400 EV  
 OSCILLATOR STRENGTH = 1.058500

| OCC | VIR | EXCITATION<br>AMPLITUDE | DE-EXCITATION<br>AMPLITUDE |
|-----|-----|-------------------------|----------------------------|
| I   | A   | X(I->A)                 | Y(A->I)                    |
| --- | --- | -----                   | -----                      |
| 90  | 93  | 0.128280                | 0.000000                   |
| 91  | 92  | 0.676920                | 0.000000                   |

STATE # 2 ENERGY = 3.926600 EV  
 OSCILLATOR STRENGTH = 0.267500

| OCC | VIR | EXCITATION<br>AMPLITUDE | DE-EXCITATION<br>AMPLITUDE |
|-----|-----|-------------------------|----------------------------|
| I   | A   | X(I->A)                 | Y(A->I)                    |
| --- | --- | -----                   | -----                      |
| 85  | 93  | 0.190010                | 0.000000                   |
| 90  | 92  | -0.152890               | 0.000000                   |
| 91  | 93  | 0.618670                | 0.000000                   |

STATE # 3 ENERGY = 4.230800 EV  
 OSCILLATOR STRENGTH = 0.020900

| OCC | VIR | EXCITATION<br>AMPLITUDE | DE-EXCITATION<br>AMPLITUDE |
|-----|-----|-------------------------|----------------------------|
| I   | A   | X(I->A)                 | Y(A->I)                    |
| --- | --- | -----                   | -----                      |
| 83  | 93  | -0.185290               | 0.000000                   |
| 84  | 92  | 0.366870                | 0.000000                   |
| 85  | 92  | 0.524720                | 0.000000                   |
| 87  | 92  | 0.112750                | 0.000000                   |

STATE # 4 ENERGY = 4.399400 EV  
 OSCILLATOR STRENGTH = 1.161400

| OCC | VIR | EXCITATION<br>AMPLITUDE | DE-EXCITATION<br>AMPLITUDE |
|-----|-----|-------------------------|----------------------------|
| I   | A   | X(I->A)                 | Y(A->I)                    |
| --- | --- | -----                   | -----                      |
| 90  | 92  | 0.657330                | 0.000000                   |
| 91  | 93  | 0.179230                | 0.000000                   |

STATE # 5 ENERGY = 4.568200 EV  
 OSCILLATOR STRENGTH = 0.002000

| OCC | VIR | EXCITATION<br>AMPLITUDE | DE-EXCITATION<br>AMPLITUDE |
|-----|-----|-------------------------|----------------------------|
| I   | A   | X(I->A)                 | Y(A->I)                    |
| --- | --- | -----                   | -----                      |
| 83  | 92  | -0.138830               | 0.000000                   |
| 85  | 93  | 0.131060                | 0.000000                   |
| 86  | 92  | 0.455530                | 0.000000                   |
| 86  | 94  | -0.227420               | 0.000000                   |
| 86  | 98  | 0.143050                | 0.000000                   |
| 87  | 93  | -0.358920               | 0.000000                   |
| 87  | 95  | -0.175130               | 0.000000                   |



STATE # 6 ENERGY = 4.573300 EV  
 OSCILLATOR STRENGTH = 0.001100

| OCC | VIR | EXCITATION | DE-EXCITATION |
|-----|-----|------------|---------------|
|     |     | AMPLITUDE  | AMPLITUDE     |
| I   | A   | X(I->A)    | Y(A->I)       |
| --- | --- | -----      | -----         |
| 86  | 93  | -0.392610  | 0.000000      |
| 86  | 95  | -0.183510  | 0.000000      |
| 87  | 92  | 0.456570   | 0.000000      |
| 87  | 94  | -0.230880  | 0.000000      |
| 87  | 98  | 0.145910   | 0.000000      |

STATE # 7 ENERGY = 4.658000 EV  
 OSCILLATOR STRENGTH = 0.032500

| OCC | VIR | EXCITATION | DE-EXCITATION |
|-----|-----|------------|---------------|
|     |     | AMPLITUDE  | AMPLITUDE     |
| I   | A   | X(I->A)    | Y(A->I)       |
| --- | --- | -----      | -----         |
| 83  | 92  | 0.536180   | 0.000000      |
| 83  | 98  | -0.106640  | 0.000000      |
| 84  | 93  | -0.237630  | 0.000000      |
| 85  | 93  | -0.204640  | 0.000000      |
| 87  | 93  | -0.150220  | 0.000000      |
| 91  | 93  | 0.175810   | 0.000000      |

STATE # 8 ENERGY = 4.740900 EV  
 OSCILLATOR STRENGTH = 0.029500

| OCC | VIR | EXCITATION | DE-EXCITATION |
|-----|-----|------------|---------------|
|     |     | AMPLITUDE  | AMPLITUDE     |
| I   | A   | X(I->A)    | Y(A->I)       |
| --- | --- | -----      | -----         |
| 88  | 93  | -0.357990  | 0.000000      |
| 89  | 92  | 0.523340   | 0.000000      |
| 89  | 94  | -0.167430  | 0.000000      |
| 90  | 97  | 0.125880   | 0.000000      |
| 91  | 96  | -0.123780  | 0.000000      |

STATE # 9 ENERGY = 4.744300 EV  
 OSCILLATOR STRENGTH = 0.056900

| OCC | VIR | EXCITATION | DE-EXCITATION |
|-----|-----|------------|---------------|
|     |     | AMPLITUDE  | AMPLITUDE     |
| I   | A   | X(I->A)    | Y(A->I)       |
| --- | --- | -----      | -----         |
| 88  | 92  | 0.523610   | 0.000000      |
| 88  | 94  | -0.166810  | 0.000000      |
| 89  | 93  | -0.356980  | 0.000000      |
| 90  | 96  | 0.139750   | 0.000000      |
| 91  | 97  | -0.113830  | 0.000000      |

STATE # 10 ENERGY = 4.916100 EV  
 OSCILLATOR STRENGTH = 0.228300

| OCC | VIR | EXCITATION | DE-EXCITATION |
|-----|-----|------------|---------------|
|     |     | AMPLITUDE  | AMPLITUDE     |

| I   | A   | X(I->A)  | Y(A->I)  |
|-----|-----|----------|----------|
| --- | --- | -----    | -----    |
| 83  | 93  | 0.186070 | 0.000000 |
| 84  | 92  | 0.182720 | 0.000000 |
| 85  | 94  | 0.198020 | 0.000000 |
| 90  | 93  | 0.582400 | 0.000000 |

STATE # 11 ENERGY = 5.070100 EV

OSCILLATOR STRENGTH = 0.245300

|     |     | EXCITATION | DE-EXCITATION |
|-----|-----|------------|---------------|
| OCC | VIR | AMPLITUDE  | AMPLITUDE     |
| I   | A   | X(I->A)    | Y(A->I)       |
| --- | --- | -----      | -----         |
| 83  | 92  | 0.359890   | 0.000000      |
| 83  | 94  | 0.138080   | 0.000000      |
| 84  | 93  | 0.178700   | 0.000000      |
| 85  | 93  | 0.479520   | 0.000000      |
| 90  | 94  | 0.143110   | 0.000000      |
| 91  | 93  | -0.135270  | 0.000000      |

STATE # 12 ENERGY = 5.179700 EV

OSCILLATOR STRENGTH = 0.001400

|     |     | EXCITATION | DE-EXCITATION |
|-----|-----|------------|---------------|
| OCC | VIR | AMPLITUDE  | AMPLITUDE     |
| I   | A   | X(I->A)    | Y(A->I)       |
| --- | --- | -----      | -----         |
| 83  | 93  | -0.124910  | 0.000000      |
| 91  | 94  | 0.648660   | 0.000000      |

STATE # 13 ENERGY = 5.379300 EV

OSCILLATOR STRENGTH = 0.000600

|     |     | EXCITATION | DE-EXCITATION |
|-----|-----|------------|---------------|
| OCC | VIR | AMPLITUDE  | AMPLITUDE     |
| I   | A   | X(I->A)    | Y(A->I)       |
| --- | --- | -----      | -----         |
| 81  | 92  | 0.111870   | 0.000000      |
| 82  | 93  | 0.116890   | 0.000000      |
| 83  | 93  | -0.141500  | 0.000000      |
| 84  | 92  | 0.482860   | 0.000000      |
| 85  | 92  | -0.392440  | 0.000000      |

STATE # 14 ENERGY = 5.640300 EV

OSCILLATOR STRENGTH = 0.003400

|     |     | EXCITATION | DE-EXCITATION |
|-----|-----|------------|---------------|
| OCC | VIR | AMPLITUDE  | AMPLITUDE     |
| I   | A   | X(I->A)    | Y(A->I)       |
| --- | --- | -----      | -----         |
| 83  | 93  | 0.447970   | 0.000000      |
| 83  | 95  | -0.106720  | 0.000000      |
| 84  | 92  | 0.173080   | 0.000000      |
| 84  | 94  | 0.231590   | 0.000000      |
| 85  | 94  | 0.199740   | 0.000000      |
| 90  | 93  | -0.321230  | 0.000000      |

91 92 0.104380 0.000000

STATE # 15 ENERGY = 5.756200 EV

OSCILLATOR STRENGTH = 0.000000

|     |     | EXCITATION | DE-EXCITATION |
|-----|-----|------------|---------------|
| OCC | VIR | AMPLITUDE  | AMPLITUDE     |
| I   | A   | X(I->A)    | Y(A->I)       |
| --- | --- | -----      | -----         |
| 86  | 96  | 0.496420   | 0.000000      |
| 87  | 95  | 0.204610   | 0.000000      |
| 87  | 97  | 0.439890   | 0.000000      |

STATE # 16 ENERGY = 5.756200 EV

OSCILLATOR STRENGTH = 0.000000

|     |     | EXCITATION | DE-EXCITATION |
|-----|-----|------------|---------------|
| OCC | VIR | AMPLITUDE  | AMPLITUDE     |
| I   | A   | X(I->A)    | Y(A->I)       |
| --- | --- | -----      | -----         |
| 85  | 96  | -0.107060  | 0.000000      |
| 86  | 95  | 0.209350   | 0.000000      |
| 86  | 97  | 0.450760   | 0.000000      |
| 87  | 96  | 0.484600   | 0.000000      |

STATE # 17 ENERGY = 5.824400 EV

OSCILLATOR STRENGTH = 0.002300

|     |     | EXCITATION | DE-EXCITATION |
|-----|-----|------------|---------------|
| OCC | VIR | AMPLITUDE  | AMPLITUDE     |
| I   | A   | X(I->A)    | Y(A->I)       |
| --- | --- | -----      | -----         |
| 88  | 92  | 0.468550   | 0.000000      |
| 88  | 94  | 0.154840   | 0.000000      |
| 89  | 93  | 0.429000   | 0.000000      |
| 90  | 96  | -0.130000  | 0.000000      |
| 91  | 97  | 0.127800   | 0.000000      |

STATE # 18 ENERGY = 5.825400 EV

OSCILLATOR STRENGTH = 0.000200

|     |     | EXCITATION | DE-EXCITATION |
|-----|-----|------------|---------------|
| OCC | VIR | AMPLITUDE  | AMPLITUDE     |
| I   | A   | X(I->A)    | Y(A->I)       |
| --- | --- | -----      | -----         |
| 88  | 93  | 0.430250   | 0.000000      |
| 89  | 92  | 0.468570   | 0.000000      |
| 89  | 94  | 0.154460   | 0.000000      |
| 90  | 97  | -0.116570  | 0.000000      |
| 91  | 96  | 0.145980   | 0.000000      |

STATE # 19 ENERGY = 5.928100 EV

OSCILLATOR STRENGTH = 0.001700

|     |     | EXCITATION | DE-EXCITATION |
|-----|-----|------------|---------------|
| OCC | VIR | AMPLITUDE  | AMPLITUDE     |
| I   | A   | X(I->A)    | Y(A->I)       |
| --- | --- | -----      | -----         |

|    |    |           |          |
|----|----|-----------|----------|
| 82 | 92 | -0.138320 | 0.000000 |
| 84 | 99 | -0.101330 | 0.000000 |
| 85 | 99 | 0.219210  | 0.000000 |
| 91 | 95 | 0.326810  | 0.000000 |
| 91 | 97 | -0.127280 | 0.000000 |
| 91 | 99 | 0.502910  | 0.000000 |

STATE # 20 ENERGY = 6.028200 EV  
 OSCILLATOR STRENGTH = 0.004400

| OCC | VIR | EXCITATION<br>AMPLITUDE | DE-EXCITATION<br>AMPLITUDE |
|-----|-----|-------------------------|----------------------------|
| I   | A   | X(I->A)                 | Y(A->I)                    |
| --- | --- | -----                   | -----                      |
| 80  | 92  | -0.275620               | 0.000000                   |
| 80  | 94  | -0.167370               | 0.000000                   |
| 82  | 92  | 0.386140                | 0.000000                   |
| 82  | 94  | 0.101080                | 0.000000                   |
| 90  | 94  | -0.175390               | 0.000000                   |
| 91  | 95  | -0.196410               | 0.000000                   |
| 91  | 99  | 0.257380                | 0.000000                   |

STATE # 21 ENERGY = 6.102700 EV  
 OSCILLATOR STRENGTH = 0.003300

| OCC | VIR | EXCITATION<br>AMPLITUDE | DE-EXCITATION<br>AMPLITUDE |
|-----|-----|-------------------------|----------------------------|
| I   | A   | X(I->A)                 | Y(A->I)                    |
| --- | --- | -----                   | -----                      |
| 85  | 92  | -0.130650               | 0.000000                   |
| 86  | 93  | 0.398210                | 0.000000                   |
| 86  | 95  | 0.101820                | 0.000000                   |
| 87  | 92  | 0.507160                | 0.000000                   |
| 87  | 94  | 0.154410                | 0.000000                   |
| 87  | 98  | -0.119110               | 0.000000                   |

STATE # 22 ENERGY = 6.102900 EV  
 OSCILLATOR STRENGTH = 0.001900

| OCC | VIR | EXCITATION<br>AMPLITUDE | DE-EXCITATION<br>AMPLITUDE |
|-----|-----|-------------------------|----------------------------|
| I   | A   | X(I->A)                 | Y(A->I)                    |
| --- | --- | -----                   | -----                      |
| 86  | 92  | 0.506170                | 0.000000                   |
| 86  | 94  | 0.149170                | 0.000000                   |
| 86  | 98  | -0.115640               | 0.000000                   |
| 87  | 93  | 0.395520                | 0.000000                   |

STATE # 23 ENERGY = 6.153700 EV  
 OSCILLATOR STRENGTH = 0.048300

| OCC | VIR | EXCITATION<br>AMPLITUDE | DE-EXCITATION<br>AMPLITUDE |
|-----|-----|-------------------------|----------------------------|
| I   | A   | X(I->A)                 | Y(A->I)                    |
| --- | --- | -----                   | -----                      |
| 80  | 92  | 0.107120                | 0.000000                   |
| 84  | 93  | 0.428060                | 0.000000                   |

|    |    |           |          |
|----|----|-----------|----------|
| 85 | 93 | -0.317150 | 0.000000 |
| 90 | 94 | 0.150120  | 0.000000 |
| 91 | 95 | -0.256450 | 0.000000 |
| 91 | 97 | 0.108730  | 0.000000 |
| 91 | 99 | 0.145810  | 0.000000 |

STATE # 24 ENERGY = 6.254500 EV  
 OSCILLATOR STRENGTH = 0.035300

| OCC | VIR | EXCITATION | DE-EXCITATION |
|-----|-----|------------|---------------|
|     |     | AMPLITUDE  | AMPLITUDE     |
| I   | A   | X(I->A)    | Y(A->I)       |
| --- | --- | -----      | -----         |
| 84  | 93  | -0.290550  | 0.000000      |
| 88  | 96  | 0.120520   | 0.000000      |
| 89  | 93  | 0.193920   | 0.000000      |
| 89  | 97  | 0.139810   | 0.000000      |
| 90  | 94  | 0.404750   | 0.000000      |
| 90  | 96  | 0.123070   | 0.000000      |
| 91  | 95  | -0.278310  | 0.000000      |
| 91  | 99  | 0.134680   | 0.000000      |

STATE # 25 ENERGY = 6.319400 EV  
 OSCILLATOR STRENGTH = 0.005800

| OCC | VIR | EXCITATION | DE-EXCITATION |
|-----|-----|------------|---------------|
|     |     | AMPLITUDE  | AMPLITUDE     |
| I   | A   | X(I->A)    | Y(A->I)       |
| --- | --- | -----      | -----         |
| 83  | 93  | -0.228760  | 0.000000      |
| 85  | 94  | 0.327990   | 0.000000      |
| 88  | 93  | 0.217930   | 0.000000      |
| 88  | 97  | 0.109580   | 0.000000      |
| 90  | 95  | 0.192630   | 0.000000      |
| 91  | 94  | -0.113600  | 0.000000      |
| 91  | 96  | -0.233890  | 0.000000      |
| 91  | 98  | 0.288050   | 0.000000      |

STATE # 26 ENERGY = 6.400100 EV  
 OSCILLATOR STRENGTH = 0.038600

| OCC | VIR | EXCITATION | DE-EXCITATION |
|-----|-----|------------|---------------|
|     |     | AMPLITUDE  | AMPLITUDE     |
| I   | A   | X(I->A)    | Y(A->I)       |
| --- | --- | -----      | -----         |
| 83  | 93  | -0.171480  | 0.000000      |
| 84  | 94  | 0.100700   | 0.000000      |
| 85  | 94  | 0.194890   | 0.000000      |
| 85  | 96  | -0.107710  | 0.000000      |
| 88  | 93  | -0.325010  | 0.000000      |
| 88  | 95  | 0.144230   | 0.000000      |
| 89  | 94  | 0.122580   | 0.000000      |
| 89  | 98  | -0.117190  | 0.000000      |
| 90  | 97  | -0.225040  | 0.000000      |
| 91  | 96  | 0.331670   | 0.000000      |
| 91  | 98  | 0.159290   | 0.000000      |

STATE # 27 ENERGY = 6.402400 EV  
 OSCILLATOR STRENGTH = 0.007900

| OCC | VIR | EXCITATION | DE-EXCITATION |
|-----|-----|------------|---------------|
|     |     | AMPLITUDE  | AMPLITUDE     |
| I   | A   | X(I->A)    | Y(A->I)       |
| --- | --- | -----      | -----         |
| 75  | 92  | 0.130240   | 0.000000      |
| 80  | 92  | -0.359590  | 0.000000      |
| 80  | 94  | -0.203540  | 0.000000      |
| 89  | 93  | -0.138260  | 0.000000      |
| 90  | 94  | 0.393290   | 0.000000      |
| 91  | 95  | 0.186060   | 0.000000      |
| 91  | 99  | -0.118930  | 0.000000      |

STATE # 28 ENERGY = 6.416700 EV  
 OSCILLATOR STRENGTH = 0.074500

| OCC | VIR | EXCITATION | DE-EXCITATION |
|-----|-----|------------|---------------|
|     |     | AMPLITUDE  | AMPLITUDE     |
| I   | A   | X(I->A)    | Y(A->I)       |
| --- | --- | -----      | -----         |
| 80  | 92  | 0.193840   | 0.000000      |
| 80  | 94  | 0.124030   | 0.000000      |
| 84  | 93  | -0.179370  | 0.000000      |
| 88  | 94  | 0.117510   | 0.000000      |
| 88  | 98  | -0.114560  | 0.000000      |
| 89  | 93  | -0.314860  | 0.000000      |
| 89  | 95  | 0.152340   | 0.000000      |
| 90  | 96  | -0.206260  | 0.000000      |
| 91  | 97  | 0.355430   | 0.000000      |
| 91  | 99  | 0.109500   | 0.000000      |

STATE # 29 ENERGY = 6.525000 EV  
 OSCILLATOR STRENGTH = 0.006000

| OCC | VIR | EXCITATION | DE-EXCITATION |
|-----|-----|------------|---------------|
|     |     | AMPLITUDE  | AMPLITUDE     |
| I   | A   | X(I->A)    | Y(A->I)       |
| --- | --- | -----      | -----         |
| 76  | 92  | 0.140490   | 0.000000      |
| 77  | 92  | -0.131260  | 0.000000      |
| 79  | 92  | 0.115890   | 0.000000      |
| 81  | 92  | 0.512150   | 0.000000      |
| 82  | 93  | -0.211170  | 0.000000      |
| 85  | 94  | -0.163070  | 0.000000      |
| 91  | 98  | 0.120710   | 0.000000      |

STATE # 30 ENERGY = 6.549200 EV  
 OSCILLATOR STRENGTH = 0.011100

| OCC | VIR | EXCITATION | DE-EXCITATION |
|-----|-----|------------|---------------|
|     |     | AMPLITUDE  | AMPLITUDE     |
| I   | A   | X(I->A)    | Y(A->I)       |
| --- | --- | -----      | -----         |
| 76  | 92  | -0.112300  | 0.000000      |

|    |    |           |          |
|----|----|-----------|----------|
| 77 | 92 | -0.281700 | 0.000000 |
| 77 | 94 | -0.185990 | 0.000000 |
| 78 | 93 | 0.192260  | 0.000000 |
| 79 | 92 | -0.299350 | 0.000000 |
| 84 | 94 | -0.138630 | 0.000000 |
| 85 | 94 | -0.109830 | 0.000000 |
| 91 | 98 | 0.306320  | 0.000000 |

**B conformer of 5b:**

Table S10.

TOTAL FREE ENERGY IN SOLVENT = -6247.006420 A.U.

|    |             |             |             |
|----|-------------|-------------|-------------|
| N  | 3.58616800  | -0.11518500 | 1.51684200  |
| C  | 2.61359800  | -0.92606900 | 1.19561100  |
| C  | 4.64944900  | 0.12051500  | 0.70171500  |
| C  | 2.75082000  | -1.84595400 | 0.00000000  |
| C  | 4.64944900  | 0.12051500  | -0.70171500 |
| N  | 3.58616800  | -0.11518500 | -1.51684200 |
| C  | 2.61359800  | -0.92606900 | -1.19561100 |
| C  | 1.38104300  | -0.94732400 | 1.96525700  |
| C  | 1.13451200  | -0.09694000 | 2.99050100  |
| C  | 1.38104300  | -0.94732400 | -1.96525700 |
| C  | 1.13451200  | -0.09694000 | -2.99050100 |
| C  | -2.25448100 | -0.83390200 | -4.52217100 |
| C  | -1.14819400 | -0.92351800 | -3.68730100 |
| C  | -2.27418500 | 0.13647000  | -5.52727800 |
| C  | -0.04936800 | -0.05223400 | -3.83823400 |
| C  | -1.20677900 | 1.01382100  | -5.70689300 |
| C  | -0.10496100 | 0.91311500  | -4.86259900 |
| C  | -1.20677900 | 1.01382100  | 5.70689300  |
| C  | -0.10496100 | 0.91311500  | 4.86259900  |
| C  | -2.27418500 | 0.13647000  | 5.52727800  |
| C  | -0.04936800 | -0.05223400 | 3.83823400  |
| C  | -2.25448100 | -0.83390200 | 4.52217100  |
| C  | -1.14819400 | -0.92351800 | 3.68730100  |
| C  | 5.82567600  | 0.59336000  | 1.38842500  |
| N  | 6.77026200  | 0.94817700  | 1.96728800  |
| C  | 5.82567600  | 0.59336000  | -1.38842500 |
| N  | 6.77026200  | 0.94817700  | -1.96728800 |
| H  | 0.65542800  | -1.70175400 | 1.67794300  |
| H  | 1.90680300  | 0.63461900  | 3.21839600  |
| H  | 0.65542800  | -1.70175400 | -1.67794300 |
| H  | 1.90680300  | 0.63461900  | -3.21839600 |
| H  | 1.99493600  | -2.63180900 | 0.00000000  |
| H  | -3.09391400 | -1.50805300 | -4.39815000 |
| H  | -1.14424900 | -1.68171500 | -2.91144500 |
| H  | -1.23537600 | 1.76124700  | -6.49102100 |
| H  | 0.73002900  | 1.59428500  | -4.99782200 |
| H  | -1.23537600 | 1.76124700  | 6.49102100  |
| H  | 0.73002900  | 1.59428500  | 4.99782200  |
| H  | -3.09391400 | -1.50805300 | 4.39815000  |
| H  | -1.14424900 | -1.68171500 | 2.91144500  |
| Br | -3.79530900 | 0.25971500  | 6.67579400  |

|    |             |             |             |
|----|-------------|-------------|-------------|
| Br | -3.79530900 | 0.25971500  | -6.67579400 |
| H  | 3.74856700  | -2.29917000 | 0.00000000  |

Table S11.

**TD-DFT output**

HOMO: 125, LUMO: 126

STATE # 1 ENERGY = 3.138800 EV  
 OSCILLATOR STRENGTH = 1.242400

| OCC | VIR | EXCITATION<br>AMPLITUDE | DE-EXCITATION<br>AMPLITUDE |
|-----|-----|-------------------------|----------------------------|
| I   | A   | X(I->A)                 | Y(A->I)                    |
| --- | --- | -----                   | -----                      |
| 124 | 127 | 0.155110                | 0.000000                   |
| 125 | 126 | 0.669870                | 0.000000                   |

STATE # 2 ENERGY = 3.880000 EV  
 OSCILLATOR STRENGTH = 0.336000

| OCC | VIR | EXCITATION<br>AMPLITUDE | DE-EXCITATION<br>AMPLITUDE |
|-----|-----|-------------------------|----------------------------|
| I   | A   | X(I->A)                 | Y(A->I)                    |
| --- | --- | -----                   | -----                      |
| 123 | 127 | 0.197820                | 0.000000                   |
| 124 | 126 | -0.164440               | 0.000000                   |
| 125 | 127 | 0.613400                | 0.000000                   |

STATE # 3 ENERGY = 4.073500 EV  
 OSCILLATOR STRENGTH = 1.422300

| OCC | VIR | EXCITATION<br>AMPLITUDE | DE-EXCITATION<br>AMPLITUDE |
|-----|-----|-------------------------|----------------------------|
| I   | A   | X(I->A)                 | Y(A->I)                    |
| --- | --- | -----                   | -----                      |
| 119 | 126 | 0.132780                | 0.000000                   |
| 124 | 126 | 0.640490                | 0.000000                   |
| 125 | 127 | 0.207710                | 0.000000                   |

STATE # 4 ENERGY = 4.216100 EV  
 OSCILLATOR STRENGTH = 0.006000

| OCC | VIR | EXCITATION<br>AMPLITUDE | DE-EXCITATION<br>AMPLITUDE |
|-----|-----|-------------------------|----------------------------|
| I   | A   | X(I->A)                 | Y(A->I)                    |
| --- | --- | -----                   | -----                      |
| 115 | 126 | 0.155290                | 0.000000                   |
| 116 | 127 | 0.181480                | 0.000000                   |
| 120 | 126 | 0.464770                | 0.000000                   |
| 123 | 126 | 0.425390                | 0.000000                   |

STATE # 5 ENERGY = 4.654800 EV  
 OSCILLATOR STRENGTH = 0.220300

| OCC | VIR | EXCITATION<br>AMPLITUDE | DE-EXCITATION<br>AMPLITUDE |
|-----|-----|-------------------------|----------------------------|
|-----|-----|-------------------------|----------------------------|



| I   | A   | X(I->A)   | Y(A->I)  |
|-----|-----|-----------|----------|
| --- | --- | -----     | -----    |
| 116 | 127 | -0.126520 | 0.000000 |
| 119 | 127 | 0.100560  | 0.000000 |
| 120 | 126 | 0.166490  | 0.000000 |
| 123 | 128 | 0.129970  | 0.000000 |
| 124 | 127 | 0.601730  | 0.000000 |
| 125 | 126 | -0.135550 | 0.000000 |

STATE # 6 ENERGY = 4.677400 EV  
 OSCILLATOR STRENGTH = 0.027700

|     |     | EXCITATION | DE-EXCITATION |
|-----|-----|------------|---------------|
| OCC | VIR | AMPLITUDE  | AMPLITUDE     |
| I   | A   | X(I->A)    | Y(A->I)       |
| --- | --- | -----      | -----         |
| 115 | 127 | 0.140980   | 0.000000      |
| 116 | 126 | 0.501300   | 0.000000      |
| 116 | 133 | -0.108270  | 0.000000      |
| 120 | 127 | 0.310740   | 0.000000      |
| 123 | 127 | 0.212910   | 0.000000      |
| 125 | 127 | -0.169130  | 0.000000      |

STATE # 7 ENERGY = 4.809100 EV  
 OSCILLATOR STRENGTH = 0.000900

|     |     | EXCITATION | DE-EXCITATION |
|-----|-----|------------|---------------|
| OCC | VIR | AMPLITUDE  | AMPLITUDE     |
| I   | A   | X(I->A)    | Y(A->I)       |
| --- | --- | -----      | -----         |
| 121 | 126 | 0.451600   | 0.000000      |
| 121 | 128 | -0.173740  | 0.000000      |
| 122 | 127 | -0.332860  | 0.000000      |
| 122 | 131 | 0.110730   | 0.000000      |
| 123 | 130 | 0.121940   | 0.000000      |
| 124 | 129 | -0.225250  | 0.000000      |
| 125 | 130 | -0.229390  | 0.000000      |

STATE # 8 ENERGY = 4.809600 EV  
 OSCILLATOR STRENGTH = 0.014800

|     |     | EXCITATION | DE-EXCITATION |
|-----|-----|------------|---------------|
| OCC | VIR | AMPLITUDE  | AMPLITUDE     |
| I   | A   | X(I->A)    | Y(A->I)       |
| --- | --- | -----      | -----         |
| 121 | 127 | -0.333370  | 0.000000      |
| 121 | 131 | 0.110910   | 0.000000      |
| 122 | 126 | 0.452780   | 0.000000      |
| 122 | 128 | -0.174230  | 0.000000      |
| 123 | 129 | -0.117500  | 0.000000      |
| 124 | 130 | 0.231020   | 0.000000      |
| 125 | 129 | 0.229300   | 0.000000      |

STATE # 9 ENERGY = 4.994900 EV  
 OSCILLATOR STRENGTH = 0.168700

EXCITATION DE-EXCITATION

| OCC | VIR | AMPLITUDE | AMPLITUDE |
|-----|-----|-----------|-----------|
| I   | A   | X(I->A)   | Y(A->I)   |
| --- | --- | -----     | -----     |
| 116 | 126 | 0.415810  | 0.000000  |
| 116 | 128 | 0.130560  | 0.000000  |
| 120 | 127 | -0.250540 | 0.000000  |
| 123 | 127 | -0.411730 | 0.000000  |
| 124 | 128 | -0.149240 | 0.000000  |
| 125 | 127 | 0.111140  | 0.000000  |

STATE # 10 ENERGY = 5.079300 EV

OSCILLATOR STRENGTH = 0.000700

|     |     | EXCITATION | DE-EXCITATION |
|-----|-----|------------|---------------|
| OCC | VIR | AMPLITUDE  | AMPLITUDE     |
| I   | A   | X(I->A)    | Y(A->I)       |
| --- | --- | -----      | -----         |
| 115 | 126 | 0.133040   | 0.000000      |
| 120 | 126 | 0.122290   | 0.000000      |
| 123 | 126 | -0.104600  | 0.000000      |
| 123 | 128 | 0.156840   | 0.000000      |
| 125 | 128 | 0.619850   | 0.000000      |

STATE # 11 ENERGY = 5.108700 EV

OSCILLATOR STRENGTH = 0.007300

|     |     | EXCITATION | DE-EXCITATION |
|-----|-----|------------|---------------|
| OCC | VIR | AMPLITUDE  | AMPLITUDE     |
| I   | A   | X(I->A)    | Y(A->I)       |
| --- | --- | -----      | -----         |
| 115 | 126 | -0.255980  | 0.000000      |
| 119 | 127 | 0.131810   | 0.000000      |
| 120 | 126 | -0.288360  | 0.000000      |
| 123 | 126 | 0.490840   | 0.000000      |
| 124 | 127 | 0.137800   | 0.000000      |
| 125 | 128 | 0.178000   | 0.000000      |

STATE # 12 ENERGY = 5.575600 EV

OSCILLATOR STRENGTH = 0.019100

|     |     | EXCITATION | DE-EXCITATION |
|-----|-----|------------|---------------|
| OCC | VIR | AMPLITUDE  | AMPLITUDE     |
| I   | A   | X(I->A)    | Y(A->I)       |
| --- | --- | -----      | -----         |
| 115 | 128 | -0.108240  | 0.000000      |
| 116 | 127 | 0.473580   | 0.000000      |
| 116 | 131 | 0.118800   | 0.000000      |
| 120 | 126 | -0.100650  | 0.000000      |
| 120 | 128 | -0.296960  | 0.000000      |
| 123 | 128 | -0.156260  | 0.000000      |
| 124 | 127 | 0.226880   | 0.000000      |

STATE # 13 ENERGY = 5.688700 EV

OSCILLATOR STRENGTH = 0.050900

|     |     | EXCITATION | DE-EXCITATION |
|-----|-----|------------|---------------|
| OCC | VIR | AMPLITUDE  | AMPLITUDE     |

| I   | A   | X(I->A)   | Y(A->I)  |
|-----|-----|-----------|----------|
| --- | --- | -----     | -----    |
| 114 | 126 | -0.219660 | 0.000000 |
| 119 | 126 | 0.535500  | 0.000000 |
| 120 | 127 | -0.105760 | 0.000000 |
| 124 | 126 | -0.147840 | 0.000000 |
| 124 | 128 | 0.175710  | 0.000000 |
| 125 | 127 | 0.110920  | 0.000000 |
| 125 | 131 | -0.169970 | 0.000000 |

STATE # 14 ENERGY = 5.796500 EV

OSCILLATOR STRENGTH = 0.026800

| OCC | VIR | EXCITATION<br>AMPLITUDE | DE-EXCITATION<br>AMPLITUDE |
|-----|-----|-------------------------|----------------------------|
| I   | A   | X(I->A)                 | Y(A->I)                    |
| --- | --- | -----                   | -----                      |
| 121 | 131 | -0.105880               | 0.000000                   |
| 122 | 126 | 0.456940                | 0.000000                   |
| 122 | 133 | -0.106110               | 0.000000                   |
| 124 | 128 | -0.141510               | 0.000000                   |
| 124 | 130 | -0.239460               | 0.000000                   |
| 125 | 129 | -0.347470               | 0.000000                   |
| 125 | 132 | 0.113640                | 0.000000                   |

STATE # 15 ENERGY = 5.810400 EV

OSCILLATOR STRENGTH = 0.041800

| OCC | VIR | EXCITATION<br>AMPLITUDE | DE-EXCITATION<br>AMPLITUDE |
|-----|-----|-------------------------|----------------------------|
| I   | A   | X(I->A)                 | Y(A->I)                    |
| --- | --- | -----                   | -----                      |
| 121 | 126 | 0.495580                | 0.000000                   |
| 121 | 133 | -0.113780               | 0.000000                   |
| 122 | 131 | -0.109040               | 0.000000                   |
| 123 | 130 | -0.109880               | 0.000000                   |
| 124 | 129 | 0.258170                | 0.000000                   |
| 125 | 130 | 0.339830                | 0.000000                   |

STATE # 16 ENERGY = 5.855100 EV

OSCILLATOR STRENGTH = 0.018100

| OCC | VIR | EXCITATION<br>AMPLITUDE | DE-EXCITATION<br>AMPLITUDE |
|-----|-----|-------------------------|----------------------------|
| I   | A   | X(I->A)                 | Y(A->I)                    |
| --- | --- | -----                   | -----                      |
| 115 | 132 | -0.117390               | 0.000000                   |
| 119 | 126 | -0.107610               | 0.000000                   |
| 122 | 126 | -0.159210               | 0.000000                   |
| 123 | 132 | 0.275550                | 0.000000                   |
| 125 | 131 | -0.248650               | 0.000000                   |
| 125 | 132 | 0.486590                | 0.000000                   |

STATE # 17 ENERGY = 5.880300 EV

OSCILLATOR STRENGTH = 0.090400

EXCITATION DE-EXCITATION

| OCC | VIR | AMPLITUDE | AMPLITUDE |
|-----|-----|-----------|-----------|
| I   | A   | X(I->A)   | Y(A->I)   |
| --- | --- | -----     | -----     |
| 115 | 127 | -0.201320 | 0.000000  |
| 116 | 126 | 0.102840  | 0.000000  |
| 119 | 128 | -0.143240 | 0.000000  |
| 120 | 127 | -0.356620 | 0.000000  |
| 123 | 127 | 0.422440  | 0.000000  |
| 124 | 128 | -0.187470 | 0.000000  |
| 125 | 131 | -0.110260 | 0.000000  |

STATE # 18 ENERGY = 5.917100 EV  
 OSCILLATOR STRENGTH = 0.000900

| OCC | VIR | EXCITATION<br>AMPLITUDE | DE-EXCITATION<br>AMPLITUDE |
|-----|-----|-------------------------|----------------------------|
| I   | A   | X(I->A)                 | Y(A->I)                    |
| --- | --- | -----                   | -----                      |
| 119 | 135 | -0.194310               | 0.000000                   |
| 120 | 134 | -0.135990               | 0.000000                   |
| 123 | 134 | 0.283730                | 0.000000                   |
| 124 | 132 | 0.101620                | 0.000000                   |
| 124 | 135 | 0.419120                | 0.000000                   |
| 125 | 134 | -0.388270               | 0.000000                   |

STATE # 19 ENERGY = 5.917600 EV  
 OSCILLATOR STRENGTH = 0.001600

| OCC | VIR | EXCITATION<br>AMPLITUDE | DE-EXCITATION<br>AMPLITUDE |
|-----|-----|-------------------------|----------------------------|
| I   | A   | X(I->A)                 | Y(A->I)                    |
| --- | --- | -----                   | -----                      |
| 119 | 134 | -0.195490               | 0.000000                   |
| 120 | 135 | -0.135190               | 0.000000                   |
| 123 | 135 | 0.273620                | 0.000000                   |
| 124 | 134 | 0.422050                | 0.000000                   |
| 125 | 135 | -0.394090               | 0.000000                   |

STATE # 20 ENERGY = 6.014100 EV  
 OSCILLATOR STRENGTH = 0.022300

| OCC | VIR | EXCITATION<br>AMPLITUDE | DE-EXCITATION<br>AMPLITUDE |
|-----|-----|-------------------------|----------------------------|
| I   | A   | X(I->A)                 | Y(A->I)                    |
| --- | --- | -----                   | -----                      |
| 114 | 126 | 0.112270                | 0.000000                   |
| 120 | 127 | -0.195760               | 0.000000                   |
| 121 | 127 | 0.116510                | 0.000000                   |
| 122 | 126 | 0.140080                | 0.000000                   |
| 124 | 128 | 0.484590                | 0.000000                   |
| 125 | 131 | 0.234180                | 0.000000                   |
| 125 | 132 | 0.182950                | 0.000000                   |

STATE # 21 ENERGY = 6.057700 EV  
 OSCILLATOR STRENGTH = 0.000000

| EXCITATION | DE-EXCITATION |
|------------|---------------|
|------------|---------------|

| OCC | VIR | AMPLITUDE | AMPLITUDE |
|-----|-----|-----------|-----------|
| I   | A   | X(I->A)   | Y(A->I)   |
| --- | --- | -----     | -----     |
| 113 | 126 | 0.173410  | 0.000000  |
| 115 | 126 | 0.503550  | 0.000000  |
| 119 | 127 | 0.270440  | 0.000000  |
| 120 | 126 | -0.255750 | 0.000000  |
| 123 | 128 | -0.130850 | 0.000000  |

STATE # 22 ENERGY = 6.163200 EV  
 OSCILLATOR STRENGTH = 0.003700

|     |     | EXCITATION | DE-EXCITATION |
|-----|-----|------------|---------------|
| OCC | VIR | AMPLITUDE  | AMPLITUDE     |
| I   | A   | X(I->A)    | Y(A->I)       |
| --- | --- | -----      | -----         |
| 115 | 127 | 0.146640   | 0.000000      |
| 119 | 126 | 0.251550   | 0.000000      |
| 119 | 128 | -0.102040  | 0.000000      |
| 124 | 128 | -0.291610  | 0.000000      |
| 124 | 133 | -0.143000  | 0.000000      |
| 125 | 129 | 0.174920   | 0.000000      |
| 125 | 131 | 0.382790   | 0.000000      |
| 125 | 132 | 0.179250   | 0.000000      |

STATE # 23 ENERGY = 6.190700 EV  
 OSCILLATOR STRENGTH = 0.000000

|     |     | EXCITATION | DE-EXCITATION |
|-----|-----|------------|---------------|
| OCC | VIR | AMPLITUDE  | AMPLITUDE     |
| I   | A   | X(I->A)    | Y(A->I)       |
| --- | --- | -----      | -----         |
| 117 | 126 | 0.529850   | 0.000000      |
| 117 | 128 | -0.189570  | 0.000000      |
| 117 | 133 | 0.113110   | 0.000000      |
| 118 | 127 | 0.349030   | 0.000000      |
| 118 | 131 | -0.145820  | 0.000000      |

STATE # 24 ENERGY = 6.190900 EV  
 OSCILLATOR STRENGTH = 0.000000

|     |     | EXCITATION | DE-EXCITATION |
|-----|-----|------------|---------------|
| OCC | VIR | AMPLITUDE  | AMPLITUDE     |
| I   | A   | X(I->A)    | Y(A->I)       |
| --- | --- | -----      | -----         |
| 117 | 127 | 0.350910   | 0.000000      |
| 117 | 131 | -0.148590  | 0.000000      |
| 118 | 126 | 0.530040   | 0.000000      |
| 118 | 128 | -0.189220  | 0.000000      |
| 118 | 133 | 0.113590   | 0.000000      |

STATE # 25 ENERGY = 6.201900 EV  
 OSCILLATOR STRENGTH = 0.000700

|     |     | EXCITATION | DE-EXCITATION |
|-----|-----|------------|---------------|
| OCC | VIR | AMPLITUDE  | AMPLITUDE     |
| I   | A   | X(I->A)    | Y(A->I)       |

| --- | --- | -----     | -----    |
|-----|-----|-----------|----------|
| 116 | 127 | 0.216540  | 0.000000 |
| 120 | 126 | -0.104640 | 0.000000 |
| 120 | 128 | 0.128310  | 0.000000 |
| 121 | 126 | 0.121620  | 0.000000 |
| 122 | 127 | 0.256200  | 0.000000 |
| 123 | 128 | 0.291630  | 0.000000 |
| 124 | 131 | -0.188120 | 0.000000 |
| 125 | 128 | -0.119380 | 0.000000 |
| 125 | 130 | -0.109830 | 0.000000 |
| 125 | 133 | 0.336690  | 0.000000 |

STATE # 26 ENERGY = 6.284300 EV

OSCILLATOR STRENGTH = 0.088400

|     |     | EXCITATION | DE-EXCITATION |
|-----|-----|------------|---------------|
| OCC | VIR | AMPLITUDE  | AMPLITUDE     |
| I   | A   | X(I->A)    | Y(A->I)       |
| --- | --- | -----      | -----         |
| 121 | 127 | 0.551370   | 0.000000      |
| 122 | 126 | 0.179130   | 0.000000      |
| 124 | 130 | 0.154470   | 0.000000      |
| 125 | 129 | 0.259540   | 0.000000      |
| 125 | 131 | -0.169300  | 0.000000      |

STATE # 27 ENERGY = 6.287500 EV

OSCILLATOR STRENGTH = 0.102200

|     |     | EXCITATION | DE-EXCITATION |
|-----|-----|------------|---------------|
| OCC | VIR | AMPLITUDE  | AMPLITUDE     |
| I   | A   | X(I->A)    | Y(A->I)       |
| --- | --- | -----      | -----         |
| 116 | 127 | -0.116170  | 0.000000      |
| 121 | 126 | 0.162910   | 0.000000      |
| 122 | 127 | 0.512730   | 0.000000      |
| 123 | 128 | -0.154280  | 0.000000      |
| 124 | 129 | -0.121810  | 0.000000      |
| 124 | 131 | 0.125030   | 0.000000      |
| 125 | 130 | -0.276960  | 0.000000      |
| 125 | 133 | -0.153140  | 0.000000      |

STATE # 28 ENERGY = 6.370500 EV

OSCILLATOR STRENGTH = 0.011800

|     |     | EXCITATION | DE-EXCITATION |
|-----|-----|------------|---------------|
| OCC | VIR | AMPLITUDE  | AMPLITUDE     |
| I   | A   | X(I->A)    | Y(A->I)       |
| --- | --- | -----      | -----         |
| 106 | 126 | -0.129970  | 0.000000      |
| 112 | 126 | 0.463020   | 0.000000      |
| 112 | 128 | 0.257250   | 0.000000      |
| 114 | 126 | -0.213490  | 0.000000      |
| 114 | 128 | -0.112940  | 0.000000      |
| 124 | 128 | -0.100050  | 0.000000      |
| 125 | 131 | 0.152020   | 0.000000      |
| 125 | 132 | 0.124210   | 0.000000      |

STATE # 29 ENERGY = 6.487900 EV  
 OSCILLATOR STRENGTH = 0.004500

| OCC | VIR | EXCITATION | DE-EXCITATION |
|-----|-----|------------|---------------|
|     |     | AMPLITUDE  | AMPLITUDE     |
| I   | A   | X(I->A)    | Y(A->I)       |
| --- | --- | -----      | -----         |
| 113 | 126 | 0.102310   | 0.000000      |
| 116 | 127 | -0.240570  | 0.000000      |
| 119 | 127 | -0.140610  | 0.000000      |
| 120 | 128 | -0.237290  | 0.000000      |
| 123 | 128 | -0.239260  | 0.000000      |
| 124 | 131 | -0.230100  | 0.000000      |
| 125 | 133 | 0.350140   | 0.000000      |

STATE # 30 ENERGY = 6.535600 EV  
 OSCILLATOR STRENGTH = 0.008200

| OCC | VIR | EXCITATION | DE-EXCITATION |
|-----|-----|------------|---------------|
|     |     | AMPLITUDE  | AMPLITUDE     |
| I   | A   | X(I->A)    | Y(A->I)       |
| --- | --- | -----      | -----         |
| 107 | 126 | -0.170030  | 0.000000      |
| 107 | 128 | -0.120490  | 0.000000      |
| 113 | 126 | -0.144730  | 0.000000      |
| 114 | 127 | -0.129750  | 0.000000      |
| 115 | 126 | -0.148930  | 0.000000      |
| 115 | 128 | -0.126840  | 0.000000      |
| 119 | 127 | 0.448220   | 0.000000      |
| 120 | 126 | 0.149510   | 0.000000      |
| 123 | 126 | -0.101210  | 0.000000      |
| 123 | 128 | -0.170590  | 0.000000      |
| 125 | 133 | 0.165300   | 0.000000      |

**B conformer of 5c:**

Table S12.

TOTAL FREE ENERGY IN SOLVENT = -1795.746848 A.U.

|   |             |             |             |
|---|-------------|-------------|-------------|
| N | 4.76035500  | -0.02941000 | 1.52333500  |
| C | 3.82929600  | -0.89098200 | 1.20113500  |
| C | 5.80328700  | 0.26815600  | 0.70209900  |
| C | 4.01464200  | -1.79626200 | 0.00000000  |
| C | 5.80328700  | 0.26815600  | -0.70209900 |
| N | 4.76035500  | -0.02941000 | -1.52333500 |
| C | 3.82929600  | -0.89098200 | -1.20113500 |
| C | 2.60668800  | -0.98838000 | 1.97196500  |
| C | 2.30779200  | -0.15204200 | 2.99974400  |
| C | 2.60668800  | -0.98838000 | -1.97196500 |
| C | 2.30779200  | -0.15204200 | -2.99974400 |
| C | -0.07907200 | 0.82750700  | -5.72769200 |
| C | 1.01703800  | 0.78774900  | -4.87069300 |
| C | -1.10230700 | -0.12007200 | -5.57953200 |
| C | 1.13550300  | -0.17709200 | -3.85281500 |
| C | -1.00498100 | -1.09549500 | -4.56636400 |

|   |             |             |              |
|---|-------------|-------------|--------------|
| C | 0.08944800  | -1.12197800 | -3.72418000  |
| O | -2.21622700 | -0.18759600 | -6.34938900  |
| C | -2.38414800 | 0.77617900  | -7.41115200  |
| C | -0.07907200 | 0.82750700  | 5.72769200   |
| C | 1.01703800  | 0.78774900  | 4.87069300   |
| C | -1.10230700 | -0.12007200 | 5.57953200   |
| C | 1.13550300  | -0.17709200 | 3.85281500   |
| C | -1.00498100 | -1.09549500 | 4.56636400   |
| C | 0.08944800  | -1.12197800 | 3.72418000   |
| O | -2.21622700 | -0.18759600 | 6.34938900   |
| C | -2.38414800 | 0.77617900  | 7.41115200   |
| C | 6.95347200  | 0.80583800  | 1.38561700   |
| N | 7.87745100  | 1.21398100  | 1.96327000   |
| C | 6.95347200  | 0.80583800  | -1.38561700  |
| N | 7.87745100  | 1.21398100  | -1.96327000  |
| H | 1.92756300  | -1.78624400 | 1.68803800   |
| H | 3.03511600  | 0.62721400  | 3.21971700   |
| H | 1.92756300  | -1.78624400 | -1.68803800  |
| H | 3.03511600  | 0.62721400  | -3.21971700  |
| H | 5.03497400  | -2.19668900 | 0.00000000   |
| H | -0.12612000 | 1.58837600  | -6.49655700  |
| H | 1.80576100  | 1.52499400  | -4.99243800  |
| H | -1.80679900 | -1.81969800 | -4.46910700  |
| H | 0.13769700  | -1.88634600 | -2.95534000  |
| H | -1.53910300 | 0.69959600  | -8.10535300  |
| H | -2.39296900 | 1.78586200  | -6.98394000  |
| H | -0.12612000 | 1.58837600  | 6.49655700   |
| H | 1.80576100  | 1.52499400  | 4.99243800   |
| H | -1.80679900 | -1.81969800 | 4.46910700   |
| H | 0.13769700  | -1.88634600 | 2.95534000   |
| H | -2.39296900 | 1.78586200  | 6.98394000   |
| H | -1.53910300 | 0.69959600  | 8.10535300   |
| H | 3.30184200  | -2.62160200 | 0.00000000   |
| C | -3.68300200 | 0.47631400  | -8.11024900  |
| C | -4.87797600 | 1.05505800  | -7.66548800  |
| C | -3.71606900 | -0.40485000 | -9.19794500  |
| C | -6.08624000 | 0.75979600  | -8.29765900  |
| H | -4.86013000 | 1.74087500  | -6.82250900  |
| C | -4.92278600 | -0.70205600 | -9.83227300  |
| H | -2.79248900 | -0.85711000 | -9.54975400  |
| C | -6.10988500 | -0.11973600 | -9.38242700  |
| H | -7.00651100 | 1.21718400  | -7.94680700  |
| H | -4.93633200 | -1.38392400 | -10.67729300 |
| H | -7.04920000 | -0.34755200 | -9.87756900  |
| C | -3.68300200 | 0.47631400  | 8.11024900   |
| C | -3.71606900 | -0.40485000 | 9.19794500   |
| C | -4.87797600 | 1.05505800  | 7.66548800   |
| C | -4.92278600 | -0.70205600 | 9.83227300   |
| H | -2.79248900 | -0.85711000 | 9.54975400   |
| C | -6.08624000 | 0.75979600  | 8.29765900   |
| H | -4.86013000 | 1.74087500  | 6.82250900   |
| C | -6.10988500 | -0.11973600 | 9.38242700   |
| H | -4.93633200 | -1.38392400 | 10.67729300  |



|   |             |             |            |
|---|-------------|-------------|------------|
| H | -7.00651100 | 1.21718400  | 7.94680700 |
| H | -7.04920000 | -0.34755200 | 9.87756900 |

Table S13.

**TD-DFT output**

**HOMO: 147, LUMO: 148**

STATE # 1 ENERGY = 2.999600 EV  
 OSCILLATOR STRENGTH = 1.329100

|     |     | EXCITATION | DE-EXCITATION |
|-----|-----|------------|---------------|
| OCC | VIR | AMPLITUDE  | AMPLITUDE     |
| I   | A   | X(I->A)    | Y(A->I)       |
| --- | --- | -----      | -----         |
| 146 | 149 | -0.165200  | 0.000000      |
| 147 | 148 | 0.666040   | 0.000000      |

STATE # 2 ENERGY = 3.811800 EV  
 OSCILLATOR STRENGTH = 0.004400

|     |     | EXCITATION | DE-EXCITATION |
|-----|-----|------------|---------------|
| OCC | VIR | AMPLITUDE  | AMPLITUDE     |
| I   | A   | X(I->A)    | Y(A->I)       |
| --- | --- | -----      | -----         |
| 137 | 148 | -0.138370  | 0.000000      |
| 143 | 149 | -0.120990  | 0.000000      |
| 145 | 149 | -0.164160  | 0.000000      |
| 146 | 148 | 0.450100   | 0.000000      |
| 147 | 149 | 0.458670   | 0.000000      |

STATE # 3 ENERGY = 3.869300 EV  
 OSCILLATOR STRENGTH = 1.849700

|     |     | EXCITATION | DE-EXCITATION |
|-----|-----|------------|---------------|
| OCC | VIR | AMPLITUDE  | AMPLITUDE     |
| I   | A   | X(I->A)    | Y(A->I)       |
| --- | --- | -----      | -----         |
| 146 | 148 | 0.494980   | 0.000000      |
| 147 | 149 | -0.466660  | 0.000000      |

STATE # 4 ENERGY = 4.225200 EV  
 OSCILLATOR STRENGTH = 0.000000

|     |     | EXCITATION | DE-EXCITATION |
|-----|-----|------------|---------------|
| OCC | VIR | AMPLITUDE  | AMPLITUDE     |
| I   | A   | X(I->A)    | Y(A->I)       |
| --- | --- | -----      | -----         |
| 135 | 148 | 0.120000   | 0.000000      |
| 136 | 149 | 0.175950   | 0.000000      |
| 138 | 148 | 0.466090   | 0.000000      |
| 143 | 148 | 0.277250   | 0.000000      |
| 145 | 148 | 0.336560   | 0.000000      |
| 147 | 150 | 0.103370   | 0.000000      |

STATE # 5 ENERGY = 4.470300 EV  
 OSCILLATOR STRENGTH = 0.232000

|  |  | EXCITATION | DE-EXCITATION |
|--|--|------------|---------------|
|--|--|------------|---------------|

| OCC | VIR | AMPLITUDE | AMPLITUDE |
|-----|-----|-----------|-----------|
| I   | A   | X(I->A)   | Y(A->I)   |
| --- | --- | -----     | -----     |
| 136 | 149 | -0.109070 | 0.000000  |
| 138 | 148 | 0.131050  | 0.000000  |
| 146 | 149 | 0.624350  | 0.000000  |
| 147 | 148 | 0.158060  | 0.000000  |

STATE # 6 ENERGY = 4.710700 EV  
 OSCILLATOR STRENGTH = 0.034800

|     |     | EXCITATION | DE-EXCITATION |
|-----|-----|------------|---------------|
| OCC | VIR | AMPLITUDE  | AMPLITUDE     |
| I   | A   | X(I->A)    | Y(A->I)       |
| --- | --- | -----      | -----         |
| 135 | 149 | 0.117800   | 0.000000      |
| 136 | 148 | 0.444650   | 0.000000      |
| 138 | 149 | 0.353620   | 0.000000      |
| 143 | 149 | 0.177710   | 0.000000      |
| 145 | 149 | 0.216680   | 0.000000      |
| 147 | 149 | 0.160600   | 0.000000      |

STATE # 7 ENERGY = 4.808600 EV  
 OSCILLATOR STRENGTH = 0.001600

|     |     | EXCITATION | DE-EXCITATION |
|-----|-----|------------|---------------|
| OCC | VIR | AMPLITUDE  | AMPLITUDE     |
| I   | A   | X(I->A)    | Y(A->I)       |
| --- | --- | -----      | -----         |
| 139 | 148 | 0.417130   | 0.000000      |
| 139 | 150 | -0.166020  | 0.000000      |
| 140 | 149 | -0.304880  | 0.000000      |
| 145 | 148 | -0.102200  | 0.000000      |
| 146 | 151 | -0.195730  | 0.000000      |
| 146 | 153 | 0.168800   | 0.000000      |
| 147 | 152 | -0.210870  | 0.000000      |
| 147 | 154 | 0.178350   | 0.000000      |

STATE # 8 ENERGY = 4.810600 EV  
 OSCILLATOR STRENGTH = 0.001400

|     |     | EXCITATION | DE-EXCITATION |
|-----|-----|------------|---------------|
| OCC | VIR | AMPLITUDE  | AMPLITUDE     |
| I   | A   | X(I->A)    | Y(A->I)       |
| --- | --- | -----      | -----         |
| 139 | 149 | -0.304720  | 0.000000      |
| 140 | 148 | 0.421540   | 0.000000      |
| 140 | 150 | -0.165920  | 0.000000      |
| 146 | 152 | -0.197220  | 0.000000      |
| 146 | 154 | 0.168960   | 0.000000      |
| 147 | 151 | -0.212700  | 0.000000      |
| 147 | 153 | 0.179890   | 0.000000      |

STATE # 9 ENERGY = 4.974200 EV  
 OSCILLATOR STRENGTH = 0.124500

|  |  | EXCITATION | DE-EXCITATION |
|--|--|------------|---------------|
|--|--|------------|---------------|

| OCC | VIR | AMPLITUDE | AMPLITUDE |
|-----|-----|-----------|-----------|
| I   | A   | X(I->A)   | Y(A->I)   |
| --- | --- | -----     | -----     |
| 136 | 148 | 0.477920  | 0.000000  |
| 136 | 150 | 0.111440  | 0.000000  |
| 138 | 149 | -0.183670 | 0.000000  |
| 143 | 149 | -0.248700 | 0.000000  |
| 145 | 149 | -0.307480 | 0.000000  |
| 146 | 150 | -0.154970 | 0.000000  |

STATE # 10 ENERGY = 4.981800 EV

OSCILLATOR STRENGTH = 0.003800

|     |     | EXCITATION | DE-EXCITATION |
|-----|-----|------------|---------------|
| OCC | VIR | AMPLITUDE  | AMPLITUDE     |
| I   | A   | X(I->A)    | Y(A->I)       |
| --- | --- | -----      | -----         |
| 135 | 148 | -0.233970  | 0.000000      |
| 138 | 148 | -0.385790  | 0.000000      |
| 143 | 148 | 0.266410   | 0.000000      |
| 145 | 148 | 0.406050   | 0.000000      |

STATE # 11 ENERGY = 5.004100 EV

OSCILLATOR STRENGTH = 0.001600

|     |     | EXCITATION | DE-EXCITATION |
|-----|-----|------------|---------------|
| OCC | VIR | AMPLITUDE  | AMPLITUDE     |
| I   | A   | X(I->A)    | Y(A->I)       |
| --- | --- | -----      | -----         |
| 143 | 150 | -0.104930  | 0.000000      |
| 145 | 150 | -0.149070  | 0.000000      |
| 147 | 150 | 0.634780   | 0.000000      |

STATE # 12 ENERGY = 5.569700 EV

OSCILLATOR STRENGTH = 0.059700

|     |     | EXCITATION | DE-EXCITATION |
|-----|-----|------------|---------------|
| OCC | VIR | AMPLITUDE  | AMPLITUDE     |
| I   | A   | X(I->A)    | Y(A->I)       |
| --- | --- | -----      | -----         |
| 132 | 148 | -0.122810  | 0.000000      |
| 135 | 149 | -0.104230  | 0.000000      |
| 137 | 148 | 0.429180   | 0.000000      |
| 140 | 148 | -0.174440  | 0.000000      |
| 144 | 148 | -0.335740  | 0.000000      |
| 146 | 148 | 0.132010   | 0.000000      |
| 146 | 150 | -0.147660  | 0.000000      |
| 147 | 151 | -0.116300  | 0.000000      |
| 147 | 153 | 0.118010   | 0.000000      |

STATE # 13 ENERGY = 5.576800 EV

OSCILLATOR STRENGTH = 0.030600

|     |     | EXCITATION | DE-EXCITATION |
|-----|-----|------------|---------------|
| OCC | VIR | AMPLITUDE  | AMPLITUDE     |
| I   | A   | X(I->A)    | Y(A->I)       |
| --- | --- | -----      | -----         |

|     |     |           |          |
|-----|-----|-----------|----------|
| 136 | 149 | 0.477950  | 0.000000 |
| 138 | 150 | -0.326270 | 0.000000 |
| 143 | 150 | -0.118240 | 0.000000 |
| 145 | 150 | -0.132540 | 0.000000 |
| 146 | 149 | 0.183090  | 0.000000 |

STATE # 14 ENERGY = 5.593800 EV  
 OSCILLATOR STRENGTH = 0.000000

| OCC | VIR | EXCITATION | DE-EXCITATION |
|-----|-----|------------|---------------|
|     |     | AMPLITUDE  | AMPLITUDE     |
| I   | A   | X(I->A)    | Y(A->I)       |
| --- | --- | -----      | -----         |
| 141 | 152 | 0.248260   | 0.000000      |
| 141 | 154 | 0.241450   | 0.000000      |
| 142 | 151 | 0.248270   | 0.000000      |
| 142 | 153 | 0.240990   | 0.000000      |
| 143 | 156 | 0.258140   | 0.000000      |
| 144 | 155 | 0.335240   | 0.000000      |
| 145 | 156 | -0.213260  | 0.000000      |

STATE # 15 ENERGY = 5.594000 EV  
 OSCILLATOR STRENGTH = 0.000700

| OCC | VIR | EXCITATION | DE-EXCITATION |
|-----|-----|------------|---------------|
|     |     | AMPLITUDE  | AMPLITUDE     |
| I   | A   | X(I->A)    | Y(A->I)       |
| --- | --- | -----      | -----         |
| 141 | 151 | 0.246990   | 0.000000      |
| 141 | 153 | 0.239100   | 0.000000      |
| 142 | 152 | 0.248470   | 0.000000      |
| 142 | 154 | 0.243200   | 0.000000      |
| 143 | 155 | 0.258330   | 0.000000      |
| 144 | 156 | 0.334100   | 0.000000      |
| 145 | 155 | -0.212670  | 0.000000      |

STATE # 16 ENERGY = 5.642900 EV  
 OSCILLATOR STRENGTH = 0.047200

| OCC | VIR | EXCITATION | DE-EXCITATION |
|-----|-----|------------|---------------|
|     |     | AMPLITUDE  | AMPLITUDE     |
| I   | A   | X(I->A)    | Y(A->I)       |
| --- | --- | -----      | -----         |
| 139 | 148 | 0.355310   | 0.000000      |
| 143 | 148 | 0.318530   | 0.000000      |
| 145 | 148 | -0.257840  | 0.000000      |
| 146 | 151 | 0.189780   | 0.000000      |
| 146 | 153 | -0.149540  | 0.000000      |
| 147 | 152 | 0.240300   | 0.000000      |
| 147 | 154 | -0.189890  | 0.000000      |

STATE # 17 ENERGY = 5.660800 EV  
 OSCILLATOR STRENGTH = 0.046400

| OCC | VIR | EXCITATION | DE-EXCITATION |
|-----|-----|------------|---------------|
|     |     | AMPLITUDE  | AMPLITUDE     |
| I   | A   | X(I->A)    | Y(A->I)       |

| --- | --- | -----     | -----    |
|-----|-----|-----------|----------|
| 137 | 148 | 0.197770  | 0.000000 |
| 140 | 148 | 0.350780  | 0.000000 |
| 144 | 148 | 0.129170  | 0.000000 |
| 145 | 149 | 0.125360  | 0.000000 |
| 146 | 150 | -0.323070 | 0.000000 |
| 146 | 152 | 0.173460  | 0.000000 |
| 146 | 154 | -0.133340 | 0.000000 |
| 147 | 149 | 0.101400  | 0.000000 |
| 147 | 151 | 0.218320  | 0.000000 |
| 147 | 153 | -0.173550 | 0.000000 |

STATE # 18 ENERGY = 5.712200 EV

OSCILLATOR STRENGTH = 0.025100

| OCC | VIR | EXCITATION<br>AMPLITUDE | DE-EXCITATION<br>AMPLITUDE |
|-----|-----|-------------------------|----------------------------|
| I   | A   | X(I->A)                 | Y(A->I)                    |
| --- | --- | -----                   | -----                      |
| 139 | 148 | -0.331720               | 0.000000                   |
| 143 | 148 | 0.437310                | 0.000000                   |
| 144 | 149 | -0.138940               | 0.000000                   |
| 145 | 148 | -0.298850               | 0.000000                   |
| 146 | 151 | -0.122310               | 0.000000                   |
| 147 | 152 | -0.158900               | 0.000000                   |
| 147 | 154 | 0.122600                | 0.000000                   |

STATE # 19 ENERGY = 5.713400 EV

OSCILLATOR STRENGTH = 0.003900

| OCC | VIR | EXCITATION<br>AMPLITUDE | DE-EXCITATION<br>AMPLITUDE |
|-----|-----|-------------------------|----------------------------|
| I   | A   | X(I->A)                 | Y(A->I)                    |
| --- | --- | -----                   | -----                      |
| 140 | 148 | -0.226640               | 0.000000                   |
| 144 | 148 | 0.508870                | 0.000000                   |
| 145 | 149 | 0.141200                | 0.000000                   |
| 145 | 158 | -0.102270               | 0.000000                   |
| 147 | 153 | 0.103320                | 0.000000                   |
| 147 | 157 | 0.207320                | 0.000000                   |
| 147 | 158 | 0.148750                | 0.000000                   |

STATE # 20 ENERGY = 5.743400 EV

OSCILLATOR STRENGTH = 0.016900

| OCC | VIR | EXCITATION<br>AMPLITUDE | DE-EXCITATION<br>AMPLITUDE |
|-----|-----|-------------------------|----------------------------|
| I   | A   | X(I->A)                 | Y(A->I)                    |
| --- | --- | -----                   | -----                      |
| 140 | 148 | 0.158210                | 0.000000                   |
| 143 | 157 | -0.103780               | 0.000000                   |
| 143 | 158 | -0.156610               | 0.000000                   |
| 144 | 148 | -0.194780               | 0.000000                   |
| 145 | 157 | -0.157820               | 0.000000                   |
| 145 | 158 | -0.190470               | 0.000000                   |
| 146 | 150 | 0.129060                | 0.000000                   |

|     |     |          |          |
|-----|-----|----------|----------|
| 147 | 157 | 0.376630 | 0.000000 |
| 147 | 158 | 0.339760 | 0.000000 |

STATE # 21 ENERGY = 5.817500 EV  
 OSCILLATOR STRENGTH = 0.152800

| OCC | VIR | EXCITATION<br>AMPLITUDE | DE-EXCITATION<br>AMPLITUDE |
|-----|-----|-------------------------|----------------------------|
| I   | A   | X(I->A)                 | Y(A->I)                    |
| --- | --- | -----                   | -----                      |
| 137 | 148 | 0.353450                | 0.000000                   |
| 137 | 150 | -0.111260               | 0.000000                   |
| 138 | 149 | 0.247590                | 0.000000                   |
| 143 | 149 | -0.193420               | 0.000000                   |
| 144 | 148 | 0.167470                | 0.000000                   |
| 145 | 149 | -0.241330               | 0.000000                   |
| 146 | 150 | 0.313710                | 0.000000                   |
| 147 | 158 | -0.134510               | 0.000000                   |

STATE # 22 ENERGY = 5.862200 EV  
 OSCILLATOR STRENGTH = 0.000100

| OCC | VIR | EXCITATION<br>AMPLITUDE | DE-EXCITATION<br>AMPLITUDE |
|-----|-----|-------------------------|----------------------------|
| I   | A   | X(I->A)                 | Y(A->I)                    |
| --- | --- | -----                   | -----                      |
| 141 | 148 | 0.685400                | 0.000000                   |
| 142 | 149 | -0.143410               | 0.000000                   |

STATE # 23 ENERGY = 5.862600 EV  
 OSCILLATOR STRENGTH = 0.003800

| OCC | VIR | EXCITATION<br>AMPLITUDE | DE-EXCITATION<br>AMPLITUDE |
|-----|-----|-------------------------|----------------------------|
| I   | A   | X(I->A)                 | Y(A->I)                    |
| --- | --- | -----                   | -----                      |
| 141 | 149 | -0.143460               | 0.000000                   |
| 142 | 148 | 0.679540                | 0.000000                   |

STATE # 24 ENERGY = 5.882300 EV  
 OSCILLATOR STRENGTH = 0.073100

| OCC | VIR | EXCITATION<br>AMPLITUDE | DE-EXCITATION<br>AMPLITUDE |
|-----|-----|-------------------------|----------------------------|
| I   | A   | X(I->A)                 | Y(A->I)                    |
| --- | --- | -----                   | -----                      |
| 135 | 149 | -0.119440               | 0.000000                   |
| 136 | 148 | 0.154930                | 0.000000                   |
| 138 | 149 | -0.382320               | 0.000000                   |
| 145 | 149 | 0.197910                | 0.000000                   |
| 146 | 150 | 0.407420                | 0.000000                   |

STATE # 25 ENERGY = 6.119500 EV  
 OSCILLATOR STRENGTH = 0.003900

| OCC | VIR | EXCITATION<br>AMPLITUDE | DE-EXCITATION<br>AMPLITUDE |
|-----|-----|-------------------------|----------------------------|
| I   | A   | X(I->A)                 | Y(A->I)                    |

| --- | --- | -----     | -----    |
|-----|-----|-----------|----------|
| 131 | 148 | -0.106710 | 0.000000 |
| 135 | 148 | 0.524540  | 0.000000 |
| 137 | 149 | -0.238700 | 0.000000 |
| 138 | 148 | -0.192030 | 0.000000 |
| 143 | 150 | -0.103300 | 0.000000 |
| 145 | 150 | -0.139610 | 0.000000 |

STATE # 26 ENERGY = 6.168100 EV  
 OSCILLATOR STRENGTH = 0.002100

| OCC | VIR | EXCITATION<br>AMPLITUDE | DE-EXCITATION<br>AMPLITUDE |
|-----|-----|-------------------------|----------------------------|
| I   | A   | X(I->A)                 | Y(A->I)                    |
| --- | --- | -----                   | -----                      |
| 137 | 148 | 0.151690                | 0.000000                   |
| 139 | 149 | -0.147370               | 0.000000                   |
| 146 | 150 | 0.102910                | 0.000000                   |
| 146 | 159 | 0.180900                | 0.000000                   |
| 147 | 153 | -0.187850               | 0.000000                   |
| 147 | 157 | -0.355090               | 0.000000                   |
| 147 | 158 | 0.372080                | 0.000000                   |

STATE # 27 ENERGY = 6.197200 EV  
 OSCILLATOR STRENGTH = 0.014400

| OCC | VIR | EXCITATION<br>AMPLITUDE | DE-EXCITATION<br>AMPLITUDE |
|-----|-----|-------------------------|----------------------------|
| I   | A   | X(I->A)                 | Y(A->I)                    |
| --- | --- | -----                   | -----                      |
| 136 | 149 | -0.239980               | 0.000000                   |
| 138 | 148 | 0.131230                | 0.000000                   |
| 138 | 150 | -0.103990               | 0.000000                   |
| 139 | 148 | -0.123740               | 0.000000                   |
| 140 | 149 | -0.232470               | 0.000000                   |
| 143 | 150 | -0.212870               | 0.000000                   |
| 145 | 150 | -0.255820               | 0.000000                   |
| 146 | 157 | -0.139770               | 0.000000                   |
| 146 | 158 | 0.120260                | 0.000000                   |
| 147 | 150 | -0.129140               | 0.000000                   |
| 147 | 159 | 0.293910                | 0.000000                   |

STATE # 28 ENERGY = 6.230400 EV  
 OSCILLATOR STRENGTH = 0.085200

| OCC | VIR | EXCITATION<br>AMPLITUDE | DE-EXCITATION<br>AMPLITUDE |
|-----|-----|-------------------------|----------------------------|
| I   | A   | X(I->A)                 | Y(A->I)                    |
| --- | --- | -----                   | -----                      |
| 135 | 148 | -0.133910               | 0.000000                   |
| 139 | 148 | 0.217180                | 0.000000                   |
| 140 | 149 | 0.488540                | 0.000000                   |
| 144 | 149 | 0.207860                | 0.000000                   |
| 145 | 150 | -0.147040               | 0.000000                   |
| 146 | 151 | -0.121910               | 0.000000                   |
| 147 | 152 | -0.206530               | 0.000000                   |

147 159 0.107690 0.000000

STATE # 29 ENERGY = 6.242900 EV

OSCILLATOR STRENGTH = 0.059700

| OCC | VIR | EXCITATION | DE-EXCITATION |
|-----|-----|------------|---------------|
|     |     | AMPLITUDE  | AMPLITUDE     |
| I   | A   | X(I->A)    | Y(A->I)       |
| --- | --- | -----      | -----         |
| 139 | 149 | 0.533050   | 0.000000      |
| 140 | 148 | 0.238550   | 0.000000      |
| 143 | 149 | 0.155280   | 0.000000      |
| 145 | 149 | -0.121540  | 0.000000      |
| 146 | 152 | -0.124410  | 0.000000      |
| 147 | 151 | -0.210780  | 0.000000      |
| 147 | 157 | -0.106300  | 0.000000      |

STATE # 30 ENERGY = 6.368400 EV

OSCILLATOR STRENGTH = 0.010500

| OCC | VIR | EXCITATION | DE-EXCITATION |
|-----|-----|------------|---------------|
|     |     | AMPLITUDE  | AMPLITUDE     |
| I   | A   | X(I->A)    | Y(A->I)       |
| --- | --- | -----      | -----         |
| 141 | 156 | 0.104950   | 0.000000      |
| 142 | 155 | 0.104930   | 0.000000      |
| 144 | 151 | -0.123290  | 0.000000      |
| 144 | 153 | -0.108030  | 0.000000      |
| 145 | 152 | 0.157670   | 0.000000      |
| 145 | 154 | 0.165860   | 0.000000      |
| 146 | 151 | 0.216740   | 0.000000      |
| 146 | 153 | 0.280730   | 0.000000      |
| 147 | 152 | 0.276930   | 0.000000      |
| 147 | 154 | 0.360340   | 0.000000      |

**B+B conformer of equatorial isomer of 6b:**

Table S14.

TOTAL FREE ENERGY IN SOLVENT = -6364.871323 A.U.

|   |             |             |             |
|---|-------------|-------------|-------------|
| N | -1.51060600 | 3.36462900  | -0.55743800 |
| C | -1.17793800 | 2.50403300  | 0.37066500  |
| C | -0.72793600 | 4.41456000  | -0.91240400 |
| C | -0.01526300 | 2.82244500  | 1.30813800  |
| C | 0.67702300  | 4.44411800  | -0.89813000 |
| N | 1.49782100  | 3.43071400  | -0.52216500 |
| C | 1.18244900  | 2.55835500  | 0.40117800  |
| C | -1.90239100 | 1.24679200  | 0.47581900  |
| C | -2.88236100 | 0.88724900  | -0.38764800 |
| C | 1.96829200  | 1.34292800  | 0.54403100  |
| C | 2.97231800  | 1.01168500  | -0.30305600 |
| C | 5.65241000  | -1.44420400 | -1.24374300 |
| C | 4.80362900  | -0.34111400 | -1.24059600 |
| C | 5.53061900  | -2.38935600 | -0.22738200 |
| C | 3.83053200  | -0.16438700 | -0.23760000 |
| C | 4.57894200  | -2.24659900 | 0.78550200  |



|    |             |             |             |
|----|-------------|-------------|-------------|
| C  | 3.73852000  | -1.14082400 | 0.77598800  |
| C  | -5.44995700 | -1.66038000 | -1.39514100 |
| C  | -4.65412100 | -0.51906600 | -1.35966600 |
| C  | -5.27377400 | -2.63387800 | -0.41412500 |
| C  | -3.68138400 | -0.33119700 | -0.35835800 |
| C  | -4.31962800 | -2.48200200 | 0.59511800  |
| C  | -3.53284500 | -1.33765700 | 0.61846700  |
| C  | -1.43533900 | 5.50112100  | -1.54242000 |
| N  | -2.02901800 | 6.37850600  | -2.02301700 |
| C  | 1.35024900  | 5.55963900  | -1.51466000 |
| N  | 1.91581800  | 6.46136300  | -1.98406300 |
| C  | -0.00679400 | 2.14676000  | 2.68708700  |
| C  | -1.13906600 | 2.64076500  | 3.59963300  |
| C  | -1.09742400 | 1.99716200  | 4.98825500  |
| H  | -1.62642200 | 0.59301700  | 1.29428800  |
| H  | -3.11078400 | 1.58219900  | -1.19265000 |
| H  | 1.71688100  | 0.69746900  | 1.37701000  |
| H  | 3.17072900  | 1.69548500  | -1.12542600 |
| H  | -0.04170700 | 3.90898100  | 1.46677500  |
| H  | 6.39579500  | -1.56693500 | -2.02261900 |
| H  | 4.89380000  | 0.39876500  | -2.03047100 |
| H  | 4.50065400  | -2.99086100 | 1.56939400  |
| H  | 3.00675000  | -1.03943700 | 1.57046000  |
| H  | -6.19434800 | -1.79071100 | -2.17182200 |
| H  | -4.78691100 | 0.24308900  | -2.12185000 |
| H  | -4.19767700 | -3.24943700 | 1.35057800  |
| H  | -2.79763200 | -1.23074900 | 1.40902400  |
| H  | -0.05708800 | 1.05544300  | 2.60190500  |
| H  | 0.95710700  | 2.36765300  | 3.16134300  |
| H  | -1.06975100 | 3.73175500  | 3.69661300  |
| H  | -2.10945300 | 2.43770300  | 3.12951900  |
| H  | -1.90870100 | 2.37090500  | 5.62011200  |
| H  | -1.19927600 | 0.90789600  | 4.92502700  |
| H  | -0.15128200 | 2.21306400  | 5.49672900  |
| Br | -6.35666800 | -4.20724100 | -0.44557700 |
| Br | 6.68691500  | -3.91000100 | -0.21404900 |

Table S15.

**TD-DFT output**

HOMO: 137, LUMO: 138

STATE # 1 ENERGY = 3.177800 EV

OSCILLATOR STRENGTH = 1.209600

| OCC | VIR | EXCITATION | DE-EXCITATION |
|-----|-----|------------|---------------|
|     |     | AMPLITUDE  | AMPLITUDE     |
| I   | A   | X(I->A)    | Y(A->I)       |
| --- | --- | -----      | -----         |
| 136 | 139 | -0.160640  | 0.000000      |
| 137 | 138 | 0.668230   | 0.000000      |

STATE # 2 ENERGY = 3.814000 EV

OSCILLATOR STRENGTH = 0.441200

EXCITATION DE-EXCITATION

| OCC | VIR | AMPLITUDE | AMPLITUDE |
|-----|-----|-----------|-----------|
| I   | A   | X(I->A)   | Y(A->I)   |
| --- | --- | -----     | -----     |
| 135 | 139 | 0.201260  | 0.000000  |
| 136 | 138 | 0.102260  | 0.000000  |
| 137 | 139 | 0.628020  | 0.000000  |

STATE # 3 ENERGY = 4.099900 EV

OSCILLATOR STRENGTH = 1.280300

|     |     | EXCITATION | DE-EXCITATION |
|-----|-----|------------|---------------|
| OCC | VIR | AMPLITUDE  | AMPLITUDE     |
| I   | A   | X(I->A)    | Y(A->I)       |
| --- | --- | -----      | -----         |
| 131 | 138 | 0.140930   | 0.000000      |
| 135 | 139 | 0.109740   | 0.000000      |
| 136 | 138 | 0.651510   | 0.000000      |
| 137 | 139 | -0.150130  | 0.000000      |

STATE # 4 ENERGY = 4.233500 EV

OSCILLATOR STRENGTH = 0.009800

|     |     | EXCITATION | DE-EXCITATION |
|-----|-----|------------|---------------|
| OCC | VIR | AMPLITUDE  | AMPLITUDE     |
| I   | A   | X(I->A)    | Y(A->I)       |
| --- | --- | -----      | -----         |
| 127 | 138 | 0.126690   | 0.000000      |
| 130 | 139 | -0.195830  | 0.000000      |
| 132 | 138 | 0.442520   | 0.000000      |
| 135 | 138 | 0.443460   | 0.000000      |

STATE # 5 ENERGY = 4.614400 EV

OSCILLATOR STRENGTH = 0.166900

|     |     | EXCITATION | DE-EXCITATION |
|-----|-----|------------|---------------|
| OCC | VIR | AMPLITUDE  | AMPLITUDE     |
| I   | A   | X(I->A)    | Y(A->I)       |
| --- | --- | -----      | -----         |
| 130 | 138 | -0.241950  | 0.000000      |
| 130 | 139 | -0.123720  | 0.000000      |
| 132 | 138 | -0.161370  | 0.000000      |
| 132 | 139 | 0.146180   | 0.000000      |
| 135 | 139 | 0.117260   | 0.000000      |
| 135 | 140 | 0.114620   | 0.000000      |
| 136 | 139 | 0.522660   | 0.000000      |
| 137 | 138 | 0.123910   | 0.000000      |

STATE # 6 ENERGY = 4.625200 EV

OSCILLATOR STRENGTH = 0.071600

|     |     | EXCITATION | DE-EXCITATION |
|-----|-----|------------|---------------|
| OCC | VIR | AMPLITUDE  | AMPLITUDE     |
| I   | A   | X(I->A)    | Y(A->I)       |
| --- | --- | -----      | -----         |
| 127 | 139 | -0.100280  | 0.000000      |
| 130 | 138 | 0.423980   | 0.000000      |
| 132 | 139 | -0.265110  | 0.000000      |

|     |     |           |          |
|-----|-----|-----------|----------|
| 135 | 139 | -0.196310 | 0.000000 |
| 136 | 139 | 0.303470  | 0.000000 |
| 137 | 139 | 0.144980  | 0.000000 |

STATE # 7 ENERGY = 4.821000 EV  
 OSCILLATOR STRENGTH = 0.004500

| OCC | VIR | EXCITATION | DE-EXCITATION |
|-----|-----|------------|---------------|
|     |     | AMPLITUDE  | AMPLITUDE     |
| I   | A   | X(I->A)    | Y(A->I)       |
| --- | --- | -----      | -----         |
| 133 | 138 | -0.211470  | 0.000000      |
| 134 | 138 | 0.385650   | 0.000000      |
| 134 | 139 | -0.336610  | 0.000000      |
| 134 | 140 | 0.154650   | 0.000000      |
| 134 | 143 | -0.114870  | 0.000000      |
| 135 | 142 | 0.109520   | 0.000000      |
| 136 | 141 | -0.192240  | 0.000000      |
| 136 | 142 | -0.125550  | 0.000000      |
| 137 | 141 | -0.112980  | 0.000000      |
| 137 | 142 | -0.206390  | 0.000000      |

STATE # 8 ENERGY = 4.821400 EV  
 OSCILLATOR STRENGTH = 0.010000

| OCC | VIR | EXCITATION | DE-EXCITATION |
|-----|-----|------------|---------------|
|     |     | AMPLITUDE  | AMPLITUDE     |
| I   | A   | X(I->A)    | Y(A->I)       |
| --- | --- | -----      | -----         |
| 133 | 138 | 0.383250   | 0.000000      |
| 133 | 139 | 0.339780   | 0.000000      |
| 133 | 140 | 0.151850   | 0.000000      |
| 133 | 143 | 0.116100   | 0.000000      |
| 134 | 138 | 0.209630   | 0.000000      |
| 135 | 141 | 0.101830   | 0.000000      |
| 136 | 141 | 0.123940   | 0.000000      |
| 136 | 142 | -0.198350  | 0.000000      |
| 137 | 141 | -0.203920  | 0.000000      |
| 137 | 142 | 0.112650   | 0.000000      |

STATE # 9 ENERGY = 4.914900 EV  
 OSCILLATOR STRENGTH = 0.185200

| OCC | VIR | EXCITATION | DE-EXCITATION |
|-----|-----|------------|---------------|
|     |     | AMPLITUDE  | AMPLITUDE     |
| I   | A   | X(I->A)    | Y(A->I)       |
| --- | --- | -----      | -----         |
| 130 | 138 | 0.410990   | 0.000000      |
| 130 | 140 | -0.123940  | 0.000000      |
| 132 | 139 | 0.243490   | 0.000000      |
| 135 | 139 | 0.410060   | 0.000000      |
| 136 | 140 | 0.135100   | 0.000000      |
| 137 | 139 | -0.129120  | 0.000000      |

STATE # 10 ENERGY = 5.063700 EV  
 OSCILLATOR STRENGTH = 0.000300

| OCC | VIR | EXCITATION<br>AMPLITUDE | DE-EXCITATION<br>AMPLITUDE |
|-----|-----|-------------------------|----------------------------|
| I   | A   | X(I->A)                 | Y(A->I)                    |
| --- | --- | -----                   | -----                      |
| 135 | 140 | 0.160920                | 0.000000                   |
| 137 | 140 | 0.644300                | 0.000000                   |

STATE # 11 ENERGY = 5.170400 EV  
 OSCILLATOR STRENGTH = 0.006600

| OCC | VIR | EXCITATION<br>AMPLITUDE | DE-EXCITATION<br>AMPLITUDE |
|-----|-----|-------------------------|----------------------------|
| I   | A   | X(I->A)                 | Y(A->I)                    |
| --- | --- | -----                   | -----                      |
| 127 | 138 | -0.272160               | 0.000000                   |
| 130 | 139 | 0.123150                | 0.000000                   |
| 131 | 139 | -0.109810               | 0.000000                   |
| 132 | 138 | -0.341450               | 0.000000                   |
| 135 | 138 | 0.488400                | 0.000000                   |

STATE # 12 ENERGY = 5.464100 EV  
 OSCILLATOR STRENGTH = 0.014400

| OCC | VIR | EXCITATION<br>AMPLITUDE | DE-EXCITATION<br>AMPLITUDE |
|-----|-----|-------------------------|----------------------------|
| I   | A   | X(I->A)                 | Y(A->I)                    |
| --- | --- | -----                   | -----                      |
| 130 | 139 | 0.490010                | 0.000000                   |
| 130 | 143 | -0.114810               | 0.000000                   |
| 132 | 138 | 0.139520                | 0.000000                   |
| 132 | 140 | -0.255180               | 0.000000                   |
| 135 | 140 | -0.146620               | 0.000000                   |
| 136 | 139 | 0.233700                | 0.000000                   |

STATE # 13 ENERGY = 5.703300 EV  
 OSCILLATOR STRENGTH = 0.042300

| OCC | VIR | EXCITATION<br>AMPLITUDE | DE-EXCITATION<br>AMPLITUDE |
|-----|-----|-------------------------|----------------------------|
| I   | A   | X(I->A)                 | Y(A->I)                    |
| --- | --- | -----                   | -----                      |
| 126 | 138 | -0.217080               | 0.000000                   |
| 131 | 138 | 0.515780                | 0.000000                   |
| 132 | 139 | 0.113380                | 0.000000                   |
| 136 | 138 | -0.142640               | 0.000000                   |
| 136 | 140 | -0.196820               | 0.000000                   |
| 137 | 139 | -0.111370               | 0.000000                   |
| 137 | 143 | -0.182350               | 0.000000                   |

STATE # 14 ENERGY = 5.814900 EV  
 OSCILLATOR STRENGTH = 0.017000

| OCC | VIR | EXCITATION<br>AMPLITUDE | DE-EXCITATION<br>AMPLITUDE |
|-----|-----|-------------------------|----------------------------|
| I   | A   | X(I->A)                 | Y(A->I)                    |
| --- | --- | -----                   | -----                      |
| 133 | 138 | 0.220590                | 0.000000                   |

|     |     |           |          |
|-----|-----|-----------|----------|
| 134 | 138 | 0.358380  | 0.000000 |
| 135 | 144 | 0.106250  | 0.000000 |
| 136 | 140 | -0.174110 | 0.000000 |
| 136 | 142 | 0.217410  | 0.000000 |
| 137 | 141 | 0.349430  | 0.000000 |
| 137 | 143 | 0.116460  | 0.000000 |
| 137 | 144 | 0.176220  | 0.000000 |

STATE # 15 ENERGY = 5.836400 EV  
 OSCILLATOR STRENGTH = 0.044500

| OCC | VIR | EXCITATION<br>AMPLITUDE | DE-EXCITATION<br>AMPLITUDE |
|-----|-----|-------------------------|----------------------------|
| I   | A   | X(I->A)                 | Y(A->I)                    |
| --- | --- | -----                   | -----                      |
| 133 | 138 | 0.427780                | 0.000000                   |
| 134 | 138 | -0.255270               | 0.000000                   |
| 135 | 142 | 0.106280                | 0.000000                   |
| 136 | 141 | -0.254280               | 0.000000                   |
| 137 | 142 | -0.345470               | 0.000000                   |

STATE # 16 ENERGY = 5.856400 EV  
 OSCILLATOR STRENGTH = 0.106700

| OCC | VIR | EXCITATION<br>AMPLITUDE | DE-EXCITATION<br>AMPLITUDE |
|-----|-----|-------------------------|----------------------------|
| I   | A   | X(I->A)                 | Y(A->I)                    |
| --- | --- | -----                   | -----                      |
| 127 | 139 | -0.190020               | 0.000000                   |
| 131 | 140 | -0.118460               | 0.000000                   |
| 132 | 139 | -0.382160               | 0.000000                   |
| 135 | 139 | 0.392450                | 0.000000                   |
| 136 | 140 | -0.150340               | 0.000000                   |
| 137 | 144 | -0.168150               | 0.000000                   |

STATE # 17 ENERGY = 5.863700 EV  
 OSCILLATOR STRENGTH = 0.016700

| OCC | VIR | EXCITATION<br>AMPLITUDE | DE-EXCITATION<br>AMPLITUDE |
|-----|-----|-------------------------|----------------------------|
| I   | A   | X(I->A)                 | Y(A->I)                    |
| --- | --- | -----                   | -----                      |
| 127 | 144 | -0.111890               | 0.000000                   |
| 133 | 138 | -0.109970               | 0.000000                   |
| 134 | 138 | -0.186470               | 0.000000                   |
| 135 | 139 | 0.125760                | 0.000000                   |
| 135 | 144 | 0.244620                | 0.000000                   |
| 136 | 142 | -0.108630               | 0.000000                   |
| 137 | 143 | 0.228970                | 0.000000                   |
| 137 | 144 | 0.447720                | 0.000000                   |

STATE # 18 ENERGY = 5.909400 EV  
 OSCILLATOR STRENGTH = 0.001200

| OCC | VIR | EXCITATION<br>AMPLITUDE | DE-EXCITATION<br>AMPLITUDE |
|-----|-----|-------------------------|----------------------------|
| I   | A   | X(I->A)                 | Y(A->I)                    |

| --- | --- | -----     | -----    |
|-----|-----|-----------|----------|
| 131 | 146 | -0.172680 | 0.000000 |
| 135 | 145 | 0.190390  | 0.000000 |
| 135 | 146 | -0.150250 | 0.000000 |
| 135 | 147 | 0.143980  | 0.000000 |
| 136 | 144 | 0.107930  | 0.000000 |
| 136 | 145 | -0.153370 | 0.000000 |
| 136 | 146 | 0.372210  | 0.000000 |
| 136 | 147 | -0.100680 | 0.000000 |
| 137 | 145 | -0.266010 | 0.000000 |
| 137 | 146 | 0.221170  | 0.000000 |
| 137 | 147 | -0.192710 | 0.000000 |

STATE # 19 ENERGY = 5.910700 EV

OSCILLATOR STRENGTH = 0.001800

| OCC | VIR | EXCITATION | DE-EXCITATION |
|-----|-----|------------|---------------|
|     |     | AMPLITUDE  | AMPLITUDE     |
| I   | A   | X(I->A)    | Y(A->I)       |
| --- | --- | -----      | -----         |
| 131 | 145 | 0.133880   | 0.000000      |
| 131 | 147 | 0.113820   | 0.000000      |
| 132 | 146 | 0.114770   | 0.000000      |
| 135 | 145 | -0.118010  | 0.000000      |
| 135 | 146 | -0.216420  | 0.000000      |
| 135 | 147 | -0.105610  | 0.000000      |
| 136 | 145 | -0.296100  | 0.000000      |
| 136 | 146 | -0.176430  | 0.000000      |
| 136 | 147 | -0.250060  | 0.000000      |
| 137 | 145 | 0.162020   | 0.000000      |
| 137 | 146 | 0.324090   | 0.000000      |
| 137 | 147 | 0.151030   | 0.000000      |

STATE # 20 ENERGY = 6.003500 EV

OSCILLATOR STRENGTH = 0.044100

| OCC | VIR | EXCITATION | DE-EXCITATION |
|-----|-----|------------|---------------|
|     |     | AMPLITUDE  | AMPLITUDE     |
| I   | A   | X(I->A)    | Y(A->I)       |
| --- | --- | -----      | -----         |
| 126 | 138 | -0.108920  | 0.000000      |
| 132 | 139 | -0.179870  | 0.000000      |
| 133 | 139 | -0.110300  | 0.000000      |
| 134 | 138 | 0.153780   | 0.000000      |
| 136 | 140 | 0.445440   | 0.000000      |
| 137 | 143 | -0.284110  | 0.000000      |
| 137 | 144 | 0.190010   | 0.000000      |

STATE # 21 ENERGY = 6.084900 EV

OSCILLATOR STRENGTH = 0.000400

| OCC | VIR | EXCITATION | DE-EXCITATION |
|-----|-----|------------|---------------|
|     |     | AMPLITUDE  | AMPLITUDE     |
| I   | A   | X(I->A)    | Y(A->I)       |
| --- | --- | -----      | -----         |
| 123 | 138 | 0.137330   | 0.000000      |

|     |     |           |          |
|-----|-----|-----------|----------|
| 127 | 138 | 0.497980  | 0.000000 |
| 131 | 139 | -0.284340 | 0.000000 |
| 132 | 138 | -0.214310 | 0.000000 |
| 135 | 140 | 0.156010  | 0.000000 |

STATE # 22 ENERGY = 6.139500 EV  
 OSCILLATOR STRENGTH = 0.006300

| OCC | VIR | EXCITATION | DE-EXCITATION |
|-----|-----|------------|---------------|
|     |     | AMPLITUDE  | AMPLITUDE     |
| I   | A   | X(I->A)    | Y(A->I)       |
| --- | --- | -----      | -----         |
| 127 | 139 | -0.139930  | 0.000000      |
| 131 | 138 | 0.263100   | 0.000000      |
| 131 | 140 | 0.108940   | 0.000000      |
| 136 | 140 | 0.333910   | 0.000000      |
| 137 | 141 | 0.177160   | 0.000000      |
| 137 | 143 | 0.350120   | 0.000000      |
| 137 | 144 | -0.147190  | 0.000000      |

STATE # 23 ENERGY = 6.159900 EV  
 OSCILLATOR STRENGTH = 0.005700

| OCC | VIR | EXCITATION | DE-EXCITATION |
|-----|-----|------------|---------------|
|     |     | AMPLITUDE  | AMPLITUDE     |
| I   | A   | X(I->A)    | Y(A->I)       |
| --- | --- | -----      | -----         |
| 130 | 139 | 0.210630   | 0.000000      |
| 131 | 139 | 0.137860   | 0.000000      |
| 132 | 138 | 0.121540   | 0.000000      |
| 132 | 140 | 0.187810   | 0.000000      |
| 134 | 139 | -0.177680  | 0.000000      |
| 135 | 140 | 0.316980   | 0.000000      |
| 136 | 143 | 0.160890   | 0.000000      |
| 137 | 140 | -0.139420  | 0.000000      |
| 137 | 145 | -0.184020  | 0.000000      |
| 137 | 147 | 0.232950   | 0.000000      |

STATE # 24 ENERGY = 6.216200 EV  
 OSCILLATOR STRENGTH = 0.000100

| OCC | VIR | EXCITATION | DE-EXCITATION |
|-----|-----|------------|---------------|
|     |     | AMPLITUDE  | AMPLITUDE     |
| I   | A   | X(I->A)    | Y(A->I)       |
| --- | --- | -----      | -----         |
| 128 | 138 | -0.315790  | 0.000000      |
| 128 | 139 | 0.257300   | 0.000000      |
| 128 | 140 | -0.117240  | 0.000000      |
| 128 | 143 | 0.108180   | 0.000000      |
| 129 | 138 | 0.413850   | 0.000000      |
| 129 | 139 | -0.248440  | 0.000000      |
| 129 | 140 | 0.153650   | 0.000000      |
| 129 | 143 | -0.105080  | 0.000000      |

STATE # 25 ENERGY = 6.216500 EV  
 OSCILLATOR STRENGTH = 0.000100

| OCC | VIR | EXCITATION | DE-EXCITATION |
|-----|-----|------------|---------------|
|     |     | AMPLITUDE  | AMPLITUDE     |
| I   | A   | X(I->A)    | Y(A->I)       |
| --- | --- | -----      | -----         |
| 128 | 138 | 0.408370   | 0.000000      |
| 128 | 139 | 0.249650   | 0.000000      |
| 128 | 140 | 0.150000   | 0.000000      |
| 128 | 143 | 0.105320   | 0.000000      |
| 129 | 138 | 0.317210   | 0.000000      |
| 129 | 139 | 0.263440   | 0.000000      |
| 129 | 140 | 0.116510   | 0.000000      |
| 129 | 143 | 0.111830   | 0.000000      |

STATE # 26 ENERGY = 6.251700 EV

OSCILLATOR STRENGTH = 0.089800

| OCC | VIR | EXCITATION | DE-EXCITATION |
|-----|-----|------------|---------------|
|     |     | AMPLITUDE  | AMPLITUDE     |
| I   | A   | X(I->A)    | Y(A->I)       |
| --- | --- | -----      | -----         |
| 133 | 138 | -0.184690  | 0.000000      |
| 133 | 139 | 0.423400   | 0.000000      |
| 134 | 139 | 0.336090   | 0.000000      |
| 135 | 140 | 0.122660   | 0.000000      |
| 136 | 141 | -0.124360  | 0.000000      |
| 137 | 142 | -0.256680  | 0.000000      |

STATE # 27 ENERGY = 6.257300 EV

OSCILLATOR STRENGTH = 0.087200

| OCC | VIR | EXCITATION | DE-EXCITATION |
|-----|-----|------------|---------------|
|     |     | AMPLITUDE  | AMPLITUDE     |
| I   | A   | X(I->A)    | Y(A->I)       |
| --- | --- | -----      | -----         |
| 133 | 139 | -0.354160  | 0.000000      |
| 134 | 138 | 0.188390   | 0.000000      |
| 134 | 139 | 0.429740   | 0.000000      |
| 136 | 142 | -0.142990  | 0.000000      |
| 137 | 141 | -0.221470  | 0.000000      |
| 137 | 142 | -0.103770  | 0.000000      |
| 137 | 143 | 0.178820   | 0.000000      |

STATE # 28 ENERGY = 6.394900 EV

OSCILLATOR STRENGTH = 0.004800

| OCC | VIR | EXCITATION | DE-EXCITATION |
|-----|-----|------------|---------------|
|     |     | AMPLITUDE  | AMPLITUDE     |
| I   | A   | X(I->A)    | Y(A->I)       |
| --- | --- | -----      | -----         |
| 121 | 138 | 0.161060   | 0.000000      |
| 122 | 138 | 0.302850   | 0.000000      |
| 122 | 140 | -0.151920  | 0.000000      |
| 124 | 138 | -0.159890  | 0.000000      |
| 125 | 138 | 0.253220   | 0.000000      |
| 131 | 139 | 0.149760   | 0.000000      |
| 132 | 140 | 0.104270   | 0.000000      |



|     |     |           |          |
|-----|-----|-----------|----------|
| 136 | 143 | -0.170010 | 0.000000 |
| 137 | 145 | 0.138390  | 0.000000 |
| 137 | 147 | -0.169170 | 0.000000 |

STATE # 29 ENERGY = 6.400800 EV  
 OSCILLATOR STRENGTH = 0.007900

| OCC | VIR | EXCITATION | DE-EXCITATION |
|-----|-----|------------|---------------|
|     |     | AMPLITUDE  | AMPLITUDE     |
| I   | A   | X(I->A)    | Y(A->I)       |
| --- | --- | -----      | -----         |
| 116 | 138 | 0.100200   | 0.000000      |
| 121 | 138 | -0.136760  | 0.000000      |
| 122 | 138 | 0.328790   | 0.000000      |
| 122 | 140 | -0.201220  | 0.000000      |
| 124 | 138 | 0.242820   | 0.000000      |
| 126 | 138 | -0.209320  | 0.000000      |
| 131 | 139 | -0.111550  | 0.000000      |
| 136 | 143 | 0.122960   | 0.000000      |
| 137 | 145 | -0.100860  | 0.000000      |
| 137 | 147 | 0.127520   | 0.000000      |

STATE # 30 ENERGY = 6.474700 EV  
 OSCILLATOR STRENGTH = 0.022600

| OCC | VIR | EXCITATION | DE-EXCITATION |
|-----|-----|------------|---------------|
|     |     | AMPLITUDE  | AMPLITUDE     |
| I   | A   | X(I->A)    | Y(A->I)       |
| --- | --- | -----      | -----         |
| 118 | 138 | 0.126600   | 0.000000      |
| 121 | 138 | 0.113570   | 0.000000      |
| 124 | 138 | -0.185790  | 0.000000      |
| 125 | 138 | 0.228110   | 0.000000      |
| 130 | 139 | -0.148230  | 0.000000      |
| 132 | 140 | -0.216020  | 0.000000      |
| 135 | 140 | -0.255490  | 0.000000      |
| 136 | 143 | 0.150730   | 0.000000      |
| 137 | 145 | -0.211900  | 0.000000      |
| 137 | 147 | 0.264860   | 0.000000      |

**B+B conformer of axial isomer of 6b:**

**Table S16.**

TOTAL FREE ENERGY IN SOLVENT = -6364.871324 A.U.

|   |             |            |             |
|---|-------------|------------|-------------|
| N | -1.54460800 | 3.02459100 | -0.62374000 |
| C | -1.20929600 | 2.16850900 | 0.30536400  |
| C | -0.76189200 | 4.04428200 | -1.05766400 |
| C | -0.02788500 | 2.39186300 | 1.24451300  |
| C | 0.63886800  | 4.09051400 | -1.04537400 |
| N | 1.47979900  | 3.12663800 | -0.59310800 |
| C | 1.18492800  | 2.25101000 | 0.33123900  |
| C | -1.98291900 | 0.94449900 | 0.46037500  |
| C | -3.00832100 | 0.60489300 | -0.35752300 |
| C | 2.04169700  | 1.08767100 | 0.51261300  |
| C | 3.10618200  | 0.81727100 | -0.28068300 |

|    |             |             |             |
|----|-------------|-------------|-------------|
| C  | 4.84447900  | -2.34256000 | 0.89049900  |
| C  | 3.93702700  | -1.29276100 | 0.83254100  |
| C  | 5.86816700  | -2.41306100 | -0.05777800 |
| C  | 4.03237500  | -0.30145600 | -0.16639500 |
| C  | 5.99523100  | -1.45125800 | -1.05782900 |
| C  | 5.07853400  | -0.40505400 | -1.10413600 |
| C  | -5.71880700 | -1.85154200 | -1.20299200 |
| C  | -4.87529900 | -0.74477300 | -1.22612500 |
| C  | -5.54366100 | -2.80991300 | -0.20691600 |
| C  | -3.85562000 | -0.57678400 | -0.26876300 |
| C  | -4.54375800 | -2.67695300 | 0.75989900  |
| C  | -3.70957500 | -1.56707900 | 0.72503500  |
| C  | -1.47925000 | 5.08561100  | -1.75069300 |
| N  | -2.08149500 | 5.92677500  | -2.28286400 |
| C  | 1.29819900  | 5.17697500  | -1.72629200 |
| N  | 1.85309700  | 6.05606200  | -2.24862900 |
| C  | -0.07032300 | 3.69960300  | 2.06895500  |
| C  | -1.25255500 | 3.74694900  | 3.04657200  |
| C  | -1.24955300 | 5.01596700  | 3.90395300  |
| H  | -1.69871700 | 0.30358100  | 1.28886500  |
| H  | -3.23702400 | 1.29149800  | -1.16983900 |
| H  | 1.78561300  | 0.43299700  | 1.33957100  |
| H  | 3.30234500  | 1.51320700  | -1.09354300 |
| H  | -0.00767200 | 1.56362300  | 1.95832600  |
| H  | 4.76244900  | -3.09924700 | 1.66200700  |
| H  | 3.14826200  | -1.24784500 | 1.57591600  |
| H  | 6.79463700  | -1.51790100 | -1.78641400 |
| H  | 5.17250800  | 0.34745900  | -1.88149900 |
| H  | -6.49897900 | -1.96708800 | -1.94615900 |
| H  | -5.00708300 | 0.00553900  | -2.00011900 |
| H  | -4.42338000 | -3.43218700 | 1.52779600  |
| H  | -2.93853400 | -1.47387100 | 1.48247300  |
| H  | 0.87078900  | 3.75993900  | 2.62884200  |
| H  | -0.09967200 | 4.57922100  | 1.42165000  |
| H  | -2.19464600 | 3.68665700  | 2.48773800  |
| H  | -1.22230400 | 2.86322900  | 3.69790000  |
| H  | -0.33328100 | 5.08964000  | 4.50021700  |
| H  | -1.31368300 | 5.91478200  | 3.28100900  |
| H  | -2.09886800 | 5.02749600  | 4.59395500  |
| Br | -6.69182800 | -4.33581100 | -0.15841000 |
| Br | 7.11662400  | -3.85658100 | 0.02227600  |

Table S17.

**TD-DFT output**

HOMO: 137, LUMO: 138

STATE # 1 ENERGY = 2.920900 EV

OSCILLATOR STRENGTH = 1.294000

| OCC | VIR | EXCITATION | DE-EXCITATION |
|-----|-----|------------|---------------|
|     |     | AMPLITUDE  | AMPLITUDE     |
| I   | A   | X(I->A)    | Y(A->I)       |
| --- | --- | -----      | -----         |

|     |     |           |          |
|-----|-----|-----------|----------|
| 118 | 121 | -0.156290 | 0.000000 |
| 119 | 120 | 0.668650  | 0.000000 |

STATE # 2 ENERGY = 3.705400 EV  
 OSCILLATOR STRENGTH = 0.150600

| OCC | VIR | EXCITATION<br>AMPLITUDE | DE-EXCITATION<br>AMPLITUDE |
|-----|-----|-------------------------|----------------------------|
| I   | A   | X(I->A)                 | Y(A->I)                    |
| --- | --- | -----                   | -----                      |
| 113 | 120 | 0.114730                | 0.000000                   |
| 117 | 121 | -0.221690               | 0.000000                   |
| 118 | 120 | 0.260950                | 0.000000                   |
| 119 | 121 | 0.577100                | 0.000000                   |

STATE # 3 ENERGY = 3.823600 EV  
 OSCILLATOR STRENGTH = 1.410000

| OCC | VIR | EXCITATION<br>AMPLITUDE | DE-EXCITATION<br>AMPLITUDE |
|-----|-----|-------------------------|----------------------------|
| I   | A   | X(I->A)                 | Y(A->I)                    |
| --- | --- | -----                   | -----                      |
| 113 | 120 | 0.104570                | 0.000000                   |
| 118 | 120 | 0.615350                | 0.000000                   |
| 119 | 121 | -0.292150               | 0.000000                   |

STATE # 4 ENERGY = 4.068500 EV  
 OSCILLATOR STRENGTH = 0.008000

| OCC | VIR | EXCITATION<br>AMPLITUDE | DE-EXCITATION<br>AMPLITUDE |
|-----|-----|-------------------------|----------------------------|
| I   | A   | X(I->A)                 | Y(A->I)                    |
| --- | --- | -----                   | -----                      |
| 112 | 121 | -0.174460               | 0.000000                   |
| 114 | 120 | 0.446380                | 0.000000                   |
| 117 | 120 | 0.463210                | 0.000000                   |

STATE # 5 ENERGY = 4.450300 EV  
 OSCILLATOR STRENGTH = 0.221100

| OCC | VIR | EXCITATION<br>AMPLITUDE | DE-EXCITATION<br>AMPLITUDE |
|-----|-----|-------------------------|----------------------------|
| I   | A   | X(I->A)                 | Y(A->I)                    |
| --- | --- | -----                   | -----                      |
| 112 | 121 | 0.106040                | 0.000000                   |
| 113 | 121 | 0.117110                | 0.000000                   |
| 114 | 120 | 0.155830                | 0.000000                   |
| 117 | 122 | 0.112940                | 0.000000                   |
| 118 | 121 | 0.618650                | 0.000000                   |
| 119 | 120 | 0.148370                | 0.000000                   |

STATE # 6 ENERGY = 4.568900 EV  
 OSCILLATOR STRENGTH = 0.022800

| OCC | VIR | EXCITATION<br>AMPLITUDE | DE-EXCITATION<br>AMPLITUDE |
|-----|-----|-------------------------|----------------------------|
| I   | A   | X(I->A)                 | Y(A->I)                    |
| --- | --- | -----                   | -----                      |

|     |     |           |          |
|-----|-----|-----------|----------|
| 111 | 121 | -0.101560 | 0.000000 |
| 112 | 120 | 0.505250  | 0.000000 |
| 114 | 121 | -0.311440 | 0.000000 |
| 117 | 121 | -0.228620 | 0.000000 |
| 119 | 121 | -0.174190 | 0.000000 |

STATE # 7 ENERGY = 4.788900 EV  
 OSCILLATOR STRENGTH = 0.029000

| OCC | VIR | EXCITATION | DE-EXCITATION |
|-----|-----|------------|---------------|
|     |     | AMPLITUDE  | AMPLITUDE     |
| I   | A   | X(I->A)    | Y(A->I)       |
| --- | --- | -----      | -----         |
| 112 | 120 | 0.223630   | 0.000000      |
| 114 | 121 | 0.119460   | 0.000000      |
| 115 | 121 | 0.213850   | 0.000000      |
| 116 | 120 | 0.358880   | 0.000000      |
| 116 | 121 | -0.100400  | 0.000000      |
| 116 | 122 | -0.133760  | 0.000000      |
| 117 | 121 | 0.242010   | 0.000000      |
| 118 | 124 | 0.220010   | 0.000000      |
| 119 | 123 | 0.236530   | 0.000000      |

STATE # 8 ENERGY = 4.794000 EV  
 OSCILLATOR STRENGTH = 0.001300

| OCC | VIR | EXCITATION | DE-EXCITATION |
|-----|-----|------------|---------------|
|     |     | AMPLITUDE  | AMPLITUDE     |
| I   | A   | X(I->A)    | Y(A->I)       |
| --- | --- | -----      | -----         |
| 115 | 120 | 0.421580   | 0.000000      |
| 115 | 121 | 0.134650   | 0.000000      |
| 115 | 122 | -0.159810  | 0.000000      |
| 116 | 121 | 0.268040   | 0.000000      |
| 117 | 120 | 0.104130   | 0.000000      |
| 117 | 124 | -0.108910  | 0.000000      |
| 118 | 123 | -0.253200  | 0.000000      |
| 119 | 124 | -0.258930  | 0.000000      |

STATE # 9 ENERGY = 4.821800 EV  
 OSCILLATOR STRENGTH = 0.117100

| OCC | VIR | EXCITATION | DE-EXCITATION |
|-----|-----|------------|---------------|
|     |     | AMPLITUDE  | AMPLITUDE     |
| I   | A   | X(I->A)    | Y(A->I)       |
| --- | --- | -----      | -----         |
| 112 | 120 | 0.332250   | 0.000000      |
| 114 | 121 | 0.188870   | 0.000000      |
| 115 | 121 | -0.172780  | 0.000000      |
| 116 | 120 | -0.240740  | 0.000000      |
| 117 | 121 | 0.354950   | 0.000000      |
| 118 | 122 | 0.111300   | 0.000000      |
| 118 | 124 | -0.134470  | 0.000000      |
| 119 | 121 | 0.107940   | 0.000000      |
| 119 | 123 | -0.123050  | 0.000000      |

STATE # 10 ENERGY = 4.889800 EV  
 OSCILLATOR STRENGTH = 0.007200

| OCC | VIR | EXCITATION |  | DE-EXCITATION |  |
|-----|-----|------------|--|---------------|--|
|     |     | AMPLITUDE  |  | AMPLITUDE     |  |
| I   | A   | X(I->A)    |  | Y(A->I)       |  |
| --- | --- | -----      |  | -----         |  |
| 111 | 120 | -0.249170  |  | 0.000000      |  |
| 112 | 120 | 0.100020   |  | 0.000000      |  |
| 114 | 120 | -0.392380  |  | 0.000000      |  |
| 117 | 120 | 0.443640   |  | 0.000000      |  |
| 119 | 122 | 0.117130   |  | 0.000000      |  |

STATE # 11 ENERGY = 4.953500 EV  
 OSCILLATOR STRENGTH = 0.003100

| OCC | VIR | EXCITATION |  | DE-EXCITATION |  |
|-----|-----|------------|--|---------------|--|
|     |     | AMPLITUDE  |  | AMPLITUDE     |  |
| I   | A   | X(I->A)    |  | Y(A->I)       |  |
| --- | --- | -----      |  | -----         |  |
| 117 | 120 | -0.114550  |  | 0.000000      |  |
| 117 | 122 | -0.183960  |  | 0.000000      |  |
| 119 | 122 | 0.629000   |  | 0.000000      |  |

STATE # 12 ENERGY = 5.447200 EV  
 OSCILLATOR STRENGTH = 0.018800

| OCC | VIR | EXCITATION |  | DE-EXCITATION |  |
|-----|-----|------------|--|---------------|--|
|     |     | AMPLITUDE  |  | AMPLITUDE     |  |
| I   | A   | X(I->A)    |  | Y(A->I)       |  |
| --- | --- | -----      |  | -----         |  |
| 112 | 121 | 0.498420   |  | 0.000000      |  |
| 112 | 125 | -0.101340  |  | 0.000000      |  |
| 113 | 121 | 0.135760   |  | 0.000000      |  |
| 114 | 120 | 0.108510   |  | 0.000000      |  |
| 114 | 122 | 0.279910   |  | 0.000000      |  |
| 117 | 122 | 0.147330   |  | 0.000000      |  |
| 118 | 121 | -0.202100  |  | 0.000000      |  |

STATE # 13 ENERGY = 5.564000 EV  
 OSCILLATOR STRENGTH = 0.057500

| OCC | VIR | EXCITATION |  | DE-EXCITATION |  |
|-----|-----|------------|--|---------------|--|
|     |     | AMPLITUDE  |  | AMPLITUDE     |  |
| I   | A   | X(I->A)    |  | Y(A->I)       |  |
| --- | --- | -----      |  | -----         |  |
| 107 | 120 | 0.138040   |  | 0.000000      |  |
| 111 | 121 | 0.137240   |  | 0.000000      |  |
| 113 | 120 | 0.473950   |  | 0.000000      |  |
| 116 | 120 | 0.225140   |  | 0.000000      |  |
| 118 | 120 | -0.141520  |  | 0.000000      |  |
| 118 | 122 | 0.109220   |  | 0.000000      |  |
| 118 | 124 | -0.125160  |  | 0.000000      |  |
| 119 | 123 | -0.180300  |  | 0.000000      |  |
| 119 | 125 | -0.154600  |  | 0.000000      |  |

STATE # 14 ENERGY = 5.633200 EV

OSCILLATOR STRENGTH = 0.060700

| OCC | VIR | EXCITATION<br>AMPLITUDE | DE-EXCITATION<br>AMPLITUDE |
|-----|-----|-------------------------|----------------------------|
| I   | A   | X(I->A)                 | Y(A->I)                    |
| --- | --- | -----                   | -----                      |
| 115 | 120 | 0.454400                | 0.000000                   |
| 116 | 120 | -0.145130               | 0.000000                   |
| 117 | 124 | 0.105380                | 0.000000                   |
| 118 | 123 | 0.284240                | 0.000000                   |
| 119 | 124 | 0.366500                | 0.000000                   |

STATE # 15 ENERGY = 5.639100 EV  
OSCILLATOR STRENGTH = 0.062900

| OCC | VIR | EXCITATION<br>AMPLITUDE | DE-EXCITATION<br>AMPLITUDE |
|-----|-----|-------------------------|----------------------------|
| I   | A   | X(I->A)                 | Y(A->I)                    |
| --- | --- | -----                   | -----                      |
| 113 | 120 | -0.194410               | 0.000000                   |
| 115 | 120 | 0.116130                | 0.000000                   |
| 116 | 120 | 0.380340                | 0.000000                   |
| 117 | 121 | 0.122780                | 0.000000                   |
| 118 | 122 | -0.244040               | 0.000000                   |
| 118 | 124 | -0.236540               | 0.000000                   |
| 119 | 123 | -0.308770               | 0.000000                   |

STATE # 16 ENERGY = 5.657400 EV  
OSCILLATOR STRENGTH = 0.003500

| OCC | VIR | EXCITATION<br>AMPLITUDE | DE-EXCITATION<br>AMPLITUDE |
|-----|-----|-------------------------|----------------------------|
| I   | A   | X(I->A)                 | Y(A->I)                    |
| --- | --- | -----                   | -----                      |
| 111 | 126 | 0.101450                | 0.000000                   |
| 113 | 120 | 0.131320                | 0.000000                   |
| 117 | 125 | -0.163870               | 0.000000                   |
| 117 | 126 | -0.297710               | 0.000000                   |
| 119 | 125 | 0.313600                | 0.000000                   |
| 119 | 126 | 0.470260                | 0.000000                   |

STATE # 17 ENERGY = 5.761600 EV  
OSCILLATOR STRENGTH = 0.166000

| OCC | VIR | EXCITATION<br>AMPLITUDE | DE-EXCITATION<br>AMPLITUDE |
|-----|-----|-------------------------|----------------------------|
| I   | A   | X(I->A)                 | Y(A->I)                    |
| --- | --- | -----                   | -----                      |
| 111 | 121 | 0.122970                | 0.000000                   |
| 112 | 120 | 0.150610                | 0.000000                   |
| 113 | 120 | -0.253350               | 0.000000                   |
| 113 | 122 | 0.115830                | 0.000000                   |
| 114 | 121 | 0.406720                | 0.000000                   |
| 117 | 121 | -0.371480               | 0.000000                   |
| 118 | 122 | 0.134910                | 0.000000                   |
| 119 | 125 | 0.105970                | 0.000000                   |

STATE # 18 ENERGY = 5.856800 EV  
 OSCILLATOR STRENGTH = 0.074000

| OCC | VIR | EXCITATION | DE-EXCITATION |
|-----|-----|------------|---------------|
|     |     | AMPLITUDE  | AMPLITUDE     |
| I   | A   | X(I->A)    | Y(A->I)       |
| --- | --- | -----      | -----         |
| 113 | 120 | -0.149980  | 0.000000      |
| 114 | 121 | -0.242430  | 0.000000      |
| 116 | 120 | 0.101660   | 0.000000      |
| 118 | 122 | 0.560300   | 0.000000      |

STATE # 19 ENERGY = 6.026900 EV  
 OSCILLATOR STRENGTH = 0.009100

| OCC | VIR | EXCITATION | DE-EXCITATION |
|-----|-----|------------|---------------|
|     |     | AMPLITUDE  | AMPLITUDE     |
| I   | A   | X(I->A)    | Y(A->I)       |
| --- | --- | -----      | -----         |
| 104 | 120 | 0.123160   | 0.000000      |
| 111 | 120 | 0.565440   | 0.000000      |
| 113 | 121 | 0.229310   | 0.000000      |
| 114 | 120 | -0.218650  | 0.000000      |

STATE # 20 ENERGY = 6.108200 EV  
 OSCILLATOR STRENGTH = 0.005400

| OCC | VIR | EXCITATION | DE-EXCITATION |
|-----|-----|------------|---------------|
|     |     | AMPLITUDE  | AMPLITUDE     |
| I   | A   | X(I->A)    | Y(A->I)       |
| --- | --- | -----      | -----         |
| 113 | 120 | 0.157200   | 0.000000      |
| 115 | 121 | -0.113600  | 0.000000      |
| 115 | 123 | -0.112580  | 0.000000      |
| 116 | 124 | 0.107510   | 0.000000      |
| 118 | 122 | -0.129610  | 0.000000      |
| 118 | 127 | 0.166580   | 0.000000      |
| 119 | 123 | 0.112090   | 0.000000      |
| 119 | 125 | 0.460030   | 0.000000      |
| 119 | 126 | -0.300890  | 0.000000      |

STATE # 21 ENERGY = 6.134500 EV  
 OSCILLATOR STRENGTH = 0.032000

| OCC | VIR | EXCITATION | DE-EXCITATION |
|-----|-----|------------|---------------|
|     |     | AMPLITUDE  | AMPLITUDE     |
| I   | A   | X(I->A)    | Y(A->I)       |
| --- | --- | -----      | -----         |
| 112 | 121 | -0.247970  | 0.000000      |
| 114 | 120 | -0.107120  | 0.000000      |
| 114 | 122 | 0.154510   | 0.000000      |
| 116 | 121 | 0.110390   | 0.000000      |
| 117 | 122 | 0.435910   | 0.000000      |
| 118 | 125 | 0.153260   | 0.000000      |
| 119 | 122 | 0.151320   | 0.000000      |
| 119 | 127 | 0.260980   | 0.000000      |

STATE # 22 ENERGY = 6.227900 EV  
 OSCILLATOR STRENGTH = 0.065700

| OCC | VIR | EXCITATION | DE-EXCITATION |
|-----|-----|------------|---------------|
|     |     | AMPLITUDE  | AMPLITUDE     |
| I   | A   | X(I->A)    | Y(A->I)       |
| --- | --- | -----      | -----         |
| 115 | 120 | -0.228130  | 0.000000      |
| 115 | 121 | 0.129340   | 0.000000      |
| 116 | 120 | 0.101320   | 0.000000      |
| 116 | 121 | 0.566590   | 0.000000      |
| 117 | 122 | -0.113810  | 0.000000      |
| 119 | 124 | 0.215590   | 0.000000      |

STATE # 23 ENERGY = 6.240500 EV  
 OSCILLATOR STRENGTH = 0.067700

| OCC | VIR | EXCITATION | DE-EXCITATION |
|-----|-----|------------|---------------|
|     |     | AMPLITUDE  | AMPLITUDE     |
| I   | A   | X(I->A)    | Y(A->I)       |
| --- | --- | -----      | -----         |
| 115 | 120 | -0.101700  | 0.000000      |
| 115 | 121 | 0.568020   | 0.000000      |
| 116 | 120 | -0.225500  | 0.000000      |
| 116 | 121 | -0.126280  | 0.000000      |
| 119 | 123 | -0.196650  | 0.000000      |
| 119 | 125 | 0.125670   | 0.000000      |

STATE # 24 ENERGY = 6.390000 EV  
 OSCILLATOR STRENGTH = 0.006900

| OCC | VIR | EXCITATION | DE-EXCITATION |
|-----|-----|------------|---------------|
|     |     | AMPLITUDE  | AMPLITUDE     |
| I   | A   | X(I->A)    | Y(A->I)       |
| --- | --- | -----      | -----         |
| 103 | 120 | 0.404920   | 0.000000      |
| 103 | 122 | 0.209460   | 0.000000      |
| 106 | 120 | 0.277560   | 0.000000      |
| 106 | 122 | 0.121800   | 0.000000      |
| 107 | 120 | -0.219410  | 0.000000      |
| 107 | 122 | -0.110120  | 0.000000      |
| 110 | 120 | 0.109330   | 0.000000      |
| 119 | 126 | 0.102520   | 0.000000      |

STATE # 25 ENERGY = 6.428400 EV  
 OSCILLATOR STRENGTH = 0.009400

| OCC | VIR | EXCITATION | DE-EXCITATION |
|-----|-----|------------|---------------|
|     |     | AMPLITUDE  | AMPLITUDE     |
| I   | A   | X(I->A)    | Y(A->I)       |
| --- | --- | -----      | -----         |
| 112 | 121 | 0.183620   | 0.000000      |
| 114 | 122 | -0.187320  | 0.000000      |
| 115 | 124 | -0.115450  | 0.000000      |
| 116 | 123 | 0.116900   | 0.000000      |
| 117 | 122 | -0.205080  | 0.000000      |
| 118 | 125 | 0.275380   | 0.000000      |



|     |     |           |          |
|-----|-----|-----------|----------|
| 118 | 126 | -0.125430 | 0.000000 |
| 119 | 127 | 0.428110  | 0.000000 |

STATE # 26 ENERGY = 6.511200 EV  
 OSCILLATOR STRENGTH = 0.028200

| OCC | VIR | EXCITATION<br>AMPLITUDE | DE-EXCITATION<br>AMPLITUDE |
|-----|-----|-------------------------|----------------------------|
| I   | A   | X(I->A)                 | Y(A->I)                    |
| --- | --- | -----                   | -----                      |
| 105 | 120 | -0.149950               | 0.000000                   |
| 106 | 120 | 0.115940                | 0.000000                   |
| 111 | 120 | -0.158450               | 0.000000                   |
| 111 | 122 | -0.116470               | 0.000000                   |
| 112 | 121 | -0.134200               | 0.000000                   |
| 113 | 121 | 0.473560                | 0.000000                   |
| 114 | 120 | 0.102910                | 0.000000                   |
| 117 | 122 | -0.141010               | 0.000000                   |
| 119 | 127 | 0.192980                | 0.000000                   |

STATE # 27 ENERGY = 6.612800 EV  
 OSCILLATOR STRENGTH = 0.048200

| OCC | VIR | EXCITATION<br>AMPLITUDE | DE-EXCITATION<br>AMPLITUDE |
|-----|-----|-------------------------|----------------------------|
| I   | A   | X(I->A)                 | Y(A->I)                    |
| --- | --- | -----                   | -----                      |
| 96  | 120 | 0.113910                | 0.000000                   |
| 101 | 121 | 0.106960                | 0.000000                   |
| 102 | 120 | 0.101860                | 0.000000                   |
| 105 | 120 | 0.371200                | 0.000000                   |
| 106 | 120 | -0.234030               | 0.000000                   |
| 107 | 120 | -0.151230               | 0.000000                   |
| 108 | 120 | 0.125200                | 0.000000                   |
| 108 | 121 | 0.134990                | 0.000000                   |
| 109 | 120 | 0.225540                | 0.000000                   |
| 110 | 120 | 0.115470                | 0.000000                   |
| 113 | 121 | 0.158740                | 0.000000                   |

STATE # 28 ENERGY = 6.637600 EV  
 OSCILLATOR STRENGTH = 0.003300

| OCC | VIR | EXCITATION<br>AMPLITUDE | DE-EXCITATION<br>AMPLITUDE |
|-----|-----|-------------------------|----------------------------|
| I   | A   | X(I->A)                 | Y(A->I)                    |
| --- | --- | -----                   | -----                      |
| 99  | 120 | -0.110930               | 0.000000                   |
| 101 | 120 | 0.162340                | 0.000000                   |
| 101 | 121 | 0.147440                | 0.000000                   |
| 102 | 120 | 0.268380                | 0.000000                   |
| 102 | 121 | 0.105440                | 0.000000                   |
| 105 | 120 | -0.141150               | 0.000000                   |
| 106 | 120 | 0.119290                | 0.000000                   |
| 108 | 120 | 0.232730                | 0.000000                   |
| 108 | 121 | 0.212740                | 0.000000                   |
| 108 | 122 | -0.107370               | 0.000000                   |

|     |     |           |          |
|-----|-----|-----------|----------|
| 109 | 120 | 0.138990  | 0.000000 |
| 110 | 120 | -0.245170 | 0.000000 |

STATE # 29 ENERGY = 6.645900 EV  
 OSCILLATOR STRENGTH = 0.001100

| OCC | VIR | EXCITATION | DE-EXCITATION |
|-----|-----|------------|---------------|
|     |     | AMPLITUDE  | AMPLITUDE     |
| I   | A   | X(I->A)    | Y(A->I)       |
| --- | --- | -----      | -----         |
| 101 | 120 | 0.242500   | 0.000000      |
| 102 | 120 | -0.188210  | 0.000000      |
| 102 | 121 | 0.188510   | 0.000000      |
| 108 | 120 | 0.266040   | 0.000000      |
| 109 | 120 | -0.260770  | 0.000000      |
| 109 | 121 | 0.269750   | 0.000000      |
| 109 | 122 | 0.106100   | 0.000000      |

STATE # 30 ENERGY = 6.706400 EV  
 OSCILLATOR STRENGTH = 0.006500

| OCC | VIR | EXCITATION | DE-EXCITATION |
|-----|-----|------------|---------------|
|     |     | AMPLITUDE  | AMPLITUDE     |
| I   | A   | X(I->A)    | Y(A->I)       |
| --- | --- | -----      | -----         |
| 99  | 120 | -0.165240  | 0.000000      |
| 100 | 120 | 0.322530   | 0.000000      |
| 100 | 122 | 0.145980   | 0.000000      |
| 102 | 122 | 0.131080   | 0.000000      |
| 106 | 120 | -0.113960  | 0.000000      |
| 109 | 120 | -0.129500  | 0.000000      |
| 110 | 120 | 0.192010   | 0.000000      |
| 113 | 121 | 0.161240   | 0.000000      |
| 114 | 122 | 0.113300   | 0.000000      |
| 117 | 122 | -0.127980  | 0.000000      |
| 118 | 125 | 0.137740   | 0.000000      |
| 119 | 128 | 0.158830   | 0.000000      |

**A+A conformer of equatorial isomer of 6d:**

**Table S18.**

TOTAL FREE ENERGY IN SOLVENT = -1451.625086 A.U.

|   |             |             |             |
|---|-------------|-------------|-------------|
| N | 3.62050400  | 1.14178500  | -0.56996700 |
| C | 2.50801700  | 0.91986500  | 0.08935000  |
| C | 4.56393100  | 0.18420800  | -0.76184500 |
| C | 2.41409000  | -0.33186400 | 0.96638800  |
| C | 4.32388200  | -1.19388800 | -0.89699300 |
| N | 3.12159800  | -1.82365200 | -0.82721000 |
| C | 2.12940800  | -1.43114500 | -0.05636300 |
| C | 1.47080600  | 1.91700300  | -0.10165000 |
| C | 0.13825200  | 1.77912700  | 0.10898600  |
| C | 0.86674200  | -2.09497400 | -0.31025500 |
| C | -0.29917300 | -1.99671300 | 0.37861800  |
| C | -3.85588200 | -3.15963000 | 0.73253500  |
| C | -2.63478800 | -2.52720400 | 0.95004500  |
| C | -4.01246500 | -3.98090900 | -0.39267800 |

|   |             |             |             |
|---|-------------|-------------|-------------|
| C | -1.54356700 | -2.68690000 | 0.07612100  |
| C | -2.93491500 | -4.15148400 | -1.28414600 |
| C | -1.72898200 | -3.51773100 | -1.05384200 |
| O | -5.14891600 | -4.64688500 | -0.71246200 |
| C | -6.28096300 | -4.52059100 | 0.14801500  |
| C | -3.28009900 | 3.30683400  | -0.24411900 |
| C | -2.24131300 | 2.41062100  | -0.00495000 |
| C | -2.97957600 | 4.61404100  | -0.65020000 |
| C | -0.89143400 | 2.77238700  | -0.16200600 |
| C | -1.63444500 | 4.99956900  | -0.81002700 |
| C | -0.61486500 | 4.09733600  | -0.57175800 |
| O | -3.90086000 | 5.57539300  | -0.91018900 |
| C | -5.28346000 | 5.25081700  | -0.77056700 |
| C | 5.88096900  | 0.69052500  | -1.05461600 |
| N | 6.94320700  | 1.11890500  | -1.25865700 |
| C | 5.40379800  | -2.03796500 | -1.34419100 |
| N | 6.26676800  | -2.74333600 | -1.67795300 |
| C | 1.63075100  | -0.23137700 | 2.28874900  |
| C | 2.35455400  | 0.66453400  | 3.30620300  |
| C | 1.61271200  | 0.75416500  | 4.64238000  |
| H | 1.85340600  | 2.82433600  | -0.56072300 |
| H | -0.24274800 | 0.83036800  | 0.47101300  |
| H | 0.92399000  | -2.76163400 | -1.16578200 |
| H | -0.34634500 | -1.36539800 | 1.25816700  |
| H | 3.45255800  | -0.52255800 | 1.27014200  |
| H | -4.66736200 | -3.01059600 | 1.43390400  |
| H | -2.52104600 | -1.89578400 | 1.82737000  |
| H | -3.07752500 | -4.78725100 | -2.15149800 |
| H | -0.92034500 | -3.66362700 | -1.76212300 |
| H | -6.62177200 | -3.48095700 | 0.20755200  |
| H | -7.06367700 | -5.13332900 | -0.29874100 |
| H | -6.05885800 | -4.89069000 | 1.15502800  |
| H | -4.30525400 | 2.98313000  | -0.11402800 |
| H | -2.48443200 | 1.39791000  | 0.30568200  |
| H | -1.42158000 | 6.01678500  | -1.12136300 |
| H | 0.41148800  | 4.42589700  | -0.69779600 |
| H | -5.52293800 | 4.96113000  | 0.25880800  |
| H | -5.82969600 | 6.15824500  | -1.02761700 |
| H | -5.57447100 | 4.44491300  | -1.45357600 |
| H | 0.61908100  | 0.15411900  | 2.15432100  |
| H | 1.53409300  | -1.24110000 | 2.70460600  |
| H | 3.36801700  | 0.27706900  | 3.47262500  |
| H | 2.47415500  | 1.67040600  | 2.88452800  |
| H | 2.15231600  | 1.39060500  | 5.35024800  |
| H | 0.61002100  | 1.17676700  | 4.51286800  |
| H | 1.50069200  | -0.23468500 | 5.10099200  |

Rotational transition state **Ts<sub>2</sub>** of equatorial isomer of **6d**:

Table S19.

TOTAL FREE ENERGY IN SOLVENT = -1451.617293 A.U.

|   |            |             |             |
|---|------------|-------------|-------------|
| N | 3.80651600 | 0.12378400  | -0.45582400 |
| C | 2.65626800 | 0.28772300  | 0.16190500  |
| C | 4.37672200 | -1.08994300 | -0.65527700 |

|   |             |             |             |
|---|-------------|-------------|-------------|
| C | 2.11586100  | -0.88514500 | 0.98014400  |
| C | 3.69933700  | -2.30034200 | -0.86180200 |
| N | 2.33714100  | -2.44916900 | -0.89439400 |
| C | 1.54662900  | -1.75447400 | -0.13653000 |
| C | 2.02352300  | 1.57507200  | -0.05025500 |
| C | 0.74290500  | 1.93175800  | 0.22263400  |
| C | 0.09020200  | -1.74936800 | -0.43199300 |
| C | -0.77719700 | -2.60999600 | 0.12592300  |
| C | -4.35347000 | -3.75913000 | 0.45602300  |
| C | -2.97581900 | -3.62211400 | 0.62757000  |
| C | -5.01008700 | -2.96578000 | -0.49212700 |
| C | -2.21949000 | -2.70736000 | -0.12036100 |
| C | -4.26919400 | -2.04707200 | -1.25790600 |
| C | -2.90262000 | -1.92399900 | -1.07477200 |
| O | -6.34509700 | -3.00751100 | -0.75006800 |
| C | -7.14897900 | -3.92493500 | -0.01193000 |
| C | -1.90384300 | 4.59227000  | 0.01381300  |
| C | -1.23852700 | 3.39365200  | 0.25619000  |
| C | -1.20595500 | 5.65947500  | -0.56830300 |
| C | 0.11939200  | 3.21428300  | -0.06511200 |
| C | 0.15486000  | 5.50273700  | -0.89781600 |
| C | 0.80085200  | 4.30639300  | -0.65189300 |
| O | -1.74234200 | 6.87134600  | -0.85274500 |
| C | -3.11895200 | 7.09812800  | -0.54970300 |
| C | 5.80319300  | -1.05126900 | -0.87354500 |
| N | 6.95642400  | -1.00404100 | -1.01451600 |
| C | 4.44079900  | -3.45620900 | -1.28649600 |
| N | 5.02647400  | -4.41124700 | -1.60125900 |
| C | 1.22002400  | -0.65118800 | 2.20557900  |
| C | 1.88026300  | 0.21861100  | 3.28426900  |
| C | 1.01380000  | 0.34788300  | 4.54032600  |
| H | 2.68103100  | 2.27383200  | -0.55931700 |
| H | 0.07792900  | 1.20518900  | 0.67682400  |
| H | -0.23699000 | -1.00298700 | -1.15486400 |
| H | -0.38893000 | -3.33284800 | 0.84248300  |
| H | 3.01259600  | -1.40707500 | 1.34037500  |
| H | -4.89618500 | -4.47826300 | 1.05701500  |
| H | -2.47638200 | -4.24354600 | 1.36626800  |
| H | -4.79207800 | -1.44603500 | -1.99459600 |
| H | -2.35726400 | -1.21405400 | -1.68885100 |
| H | -7.11834500 | -3.70931500 | 1.06236900  |
| H | -8.16714800 | -3.79194100 | -0.37804600 |
| H | -6.83399900 | -4.96067700 | -0.18309700 |
| H | -2.94990600 | 4.68502900  | 0.27752700  |
| H | -1.78840300 | 2.57232200  | 0.70793200  |
| H | 0.67759800  | 6.34026100  | -1.34741700 |
| H | 1.84901400  | 4.21692400  | -0.91721300 |
| H | -3.31204200 | 6.99846700  | 0.52419900  |
| H | -3.32712400 | 8.12135100  | -0.86178400 |
| H | -3.76691200 | 6.40940500  | -1.10308900 |
| H | 0.24471200  | -0.24275300 | 1.93251200  |
| H | 1.00983900  | -1.64149400 | 2.62911500  |
| H | 2.85270900  | -0.21506200 | 3.55173600  |

|   |            |             |            |
|---|------------|-------------|------------|
| H | 2.08922100 | 1.21503900  | 2.87835900 |
| H | 1.50545000 | 0.96730400  | 5.29664700 |
| H | 0.04693500 | 0.80905700  | 4.30947000 |
| H | 0.81531800 | -0.63206400 | 4.98856500 |

**A+B conformer of equatorial isomer of 6d:**

**Table S20.**

TOTAL FREE ENERGY IN SOLVENT = -1451.631566 A.U.

|   |             |             |             |
|---|-------------|-------------|-------------|
| N | -2.37905600 | 2.65611700  | -0.86661100 |
| C | -1.98396700 | 1.72970500  | -0.02522900 |
| C | -1.78463100 | 3.87420300  | -0.95855500 |
| C | -1.06160800 | 2.13981700  | 1.12427500  |
| C | -0.42417100 | 4.15154200  | -0.73478300 |
| N | 0.53507800  | 3.27346000  | -0.34406500 |
| C | 0.28913500  | 2.23998200  | 0.42670600  |
| C | -2.47898700 | 0.39340200  | -0.30635200 |
| C | -1.97339700 | -0.79129400 | 0.11623500  |
| C | 1.28885500  | 1.20644700  | 0.59873400  |
| C | 2.44650400  | 1.17219500  | -0.11269000 |
| C | 5.71349300  | -0.53929500 | -0.81234600 |
| C | 4.64253500  | 0.34845500  | -0.85177000 |
| C | 5.68536500  | -1.60967500 | 0.09289500  |
| C | 3.52398300  | 0.20787800  | -0.00855400 |
| C | 4.57636400  | -1.77004500 | 0.94786900  |
| C | 3.52132200  | -0.88016300 | 0.89680000  |
| O | 6.66443300  | -2.53683000 | 0.22470000  |
| C | 7.82043400  | -2.43461300 | -0.60773700 |
| C | -2.16494100 | -4.54395700 | -0.06587600 |
| C | -1.75992400 | -3.24469900 | 0.23037100  |
| C | -3.30510500 | -4.74467000 | -0.85532300 |
| C | -2.45815900 | -2.11817100 | -0.23941800 |
| C | -4.02188100 | -3.63122200 | -1.33475800 |
| C | -3.60605400 | -2.34808600 | -1.03285700 |
| O | -3.79797600 | -5.95800800 | -1.21026800 |
| C | -3.11704100 | -7.12861000 | -0.76040400 |
| C | -2.61205200 | 4.89980000  | -1.54173300 |
| N | -3.30635600 | 5.72038700  | -1.98712400 |
| C | 0.08286900  | 5.44563100  | -1.11909800 |
| N | 0.51175700  | 6.49054000  | -1.39837700 |
| C | -1.12874300 | 1.37833000  | 2.45847400  |
| C | -2.49665100 | 1.50604500  | 3.14460500  |
| C | -2.53472900 | 0.81492700  | 4.51037600  |
| H | -3.29798900 | 0.40432700  | -1.02013100 |
| H | -1.09543600 | -0.79470700 | 0.75407000  |
| H | 1.07914600  | 0.44676800  | 1.34279600  |
| H | 2.59115600  | 1.96301800  | -0.84610200 |
| H | -1.35078500 | 3.17517200  | 1.35107700  |
| H | 6.55360800  | -0.39290200 | -1.47963200 |
| H | 4.67093300  | 1.17558100  | -1.55560800 |
| H | 4.57597400  | -2.60367700 | 1.64211500  |
| H | 2.68200500  | -1.02703400 | 1.56870800  |
| H | 8.35408800  | -1.49397200 | -0.43304000 |

|   |             |             |             |
|---|-------------|-------------|-------------|
| H | 8.46067100  | -3.27187800 | -0.33073000 |
| H | 7.55530300  | -2.51340800 | -1.66775200 |
| H | -1.59494000 | -5.38114100 | 0.31732700  |
| H | -0.87432300 | -3.10022000 | 0.84345200  |
| H | -4.90330800 | -3.80620700 | -1.94259100 |
| H | -4.18175400 | -1.51137000 | -1.41453000 |
| H | -3.10312600 | -7.18605100 | 0.33379700  |
| H | -3.67955000 | -7.97230900 | -1.15998400 |
| H | -2.08989900 | -7.16314200 | -1.14060600 |
| H | -0.87938300 | 0.32004400  | 2.35367800  |
| H | -0.35923400 | 1.80738100  | 3.11240700  |
| H | -2.74187200 | 2.56944600  | 3.26323900  |
| H | -3.27183200 | 1.08083000  | 2.49606400  |
| H | -3.51647600 | 0.92562000  | 4.98085500  |
| H | -2.32909700 | -0.25750700 | 4.41854000  |
| H | -1.78841900 | 1.23935200  | 5.19121800  |

Rotational transition state **Ts<sub>1</sub>** of equatorial isomer of **6d**:

Table S21.

TOTAL FREE ENERGY IN SOLVENT = -1451.624081 A.U.

|   |             |             |             |
|---|-------------|-------------|-------------|
| N | 3.53785300  | 0.41981800  | -0.87186800 |
| C | 2.67991000  | 0.58671200  | 0.08362500  |
| C | 4.16496000  | -0.77730900 | -1.09588900 |
| C | 2.50950900  | -0.47004500 | 1.17376600  |
| C | 3.58202300  | -2.03828800 | -0.91149600 |
| N | 2.33362800  | -2.29545800 | -0.45074000 |
| C | 1.71443800  | -1.52945400 | 0.41731800  |
| C | 1.85875300  | 1.82817300  | 0.08292400  |
| C | 0.61745300  | 1.89611400  | -0.42572300 |
| C | 0.29247200  | -1.69030500 | 0.64515800  |
| C | -0.47678400 | -2.54810700 | -0.07645600 |
| C | -3.86581000 | -4.03438000 | -0.70340300 |
| C | -2.50939100 | -3.73545300 | -0.78661800 |
| C | -4.65081700 | -3.39846300 | 0.26904400  |
| C | -1.89413200 | -2.80970400 | 0.07747100  |
| C | -4.05623100 | -2.46913300 | 1.14637000  |
| C | -2.70840600 | -2.18317900 | 1.05139100  |
| O | -5.97749100 | -3.60543800 | 0.44741400  |
| C | -6.64563400 | -4.53790900 | -0.40358500 |
| C | -2.39876400 | 4.02832500  | -1.18853900 |
| C | -1.51382200 | 2.95334600  | -1.09857900 |
| C | -2.03544200 | 5.26495600  | -0.64269400 |
| C | -0.26171300 | 3.06923900  | -0.47666600 |
| C | -0.78522300 | 5.40225000  | -0.01251800 |
| C | 0.08083000  | 4.32532600  | 0.06734700  |
| O | -2.81014200 | 6.38331800  | -0.66614400 |
| C | -4.08656900 | 6.30920100  | -1.29631200 |
| C | 5.42936800  | -0.67856200 | -1.77261300 |
| N | 6.46573600  | -0.57850500 | -2.29247300 |
| C | 4.27450200  | -3.19751800 | -1.42371700 |
| N | 4.82450000  | -4.14898500 | -1.80383700 |
| C | 1.93425900  | 0.01779300  | 2.50906400  |
| C | 2.94073600  | 0.84782300  | 3.31925200  |

|   |             |             |             |
|---|-------------|-------------|-------------|
| C | 2.37143500  | 1.31592900  | 4.66129600  |
| H | 2.34034300  | 2.70203400  | 0.51884500  |
| H | 0.19408800  | 0.99187400  | -0.86120400 |
| H | -0.14299800 | -1.09301600 | 1.43700900  |
| H | 0.02429100  | -3.11289100 | -0.86019900 |
| H | 3.50487100  | -0.90064800 | 1.35103100  |
| H | -4.29789100 | -4.75282900 | -1.38862500 |
| H | -1.90691800 | -4.23187100 | -1.54220400 |
| H | -4.68130500 | -1.99049700 | 1.89270900  |
| H | -2.27748500 | -1.46585300 | 1.74218000  |
| H | -6.22848900 | -5.54497100 | -0.29473800 |
| H | -7.68687200 | -4.53978600 | -0.08202000 |
| H | -6.58858700 | -4.22958500 | -1.45326000 |
| H | -3.35422900 | 3.89180000  | -1.67998100 |
| H | -1.80610700 | 1.99836400  | -1.52743100 |
| H | -0.51944200 | 6.36716900  | 0.40659800  |
| H | 1.03745900  | 4.46303200  | 0.56169100  |
| H | -4.73586700 | 5.57778100  | -0.80124200 |
| H | -4.52482800 | 7.30293200  | -1.20209100 |
| H | -3.99447200 | 6.05219100  | -2.35784700 |
| H | 1.02789800  | 0.60913100  | 2.34016600  |
| H | 1.63861200  | -0.85851600 | 3.09849700  |
| H | 3.84503800  | 0.24971400  | 3.49079000  |
| H | 3.25888000  | 1.71985700  | 2.73374800  |
| H | 3.10942500  | 1.89783200  | 5.22183700  |
| H | 1.48712300  | 1.94693400  | 4.51876000  |
| H | 2.07503300  | 0.46443000  | 5.28392000  |

**B+B conformer of equatorial isomer of 6d:**

Table S22.

TOTAL FREE ENERGY IN SOLVENT = -1451.637789 A.U.

|   |             |             |             |
|---|-------------|-------------|-------------|
| N | -1.49395600 | 2.70542600  | -0.57608600 |
| C | -1.16631600 | 1.85143100  | 0.36317700  |
| C | -0.70433700 | 3.74781200  | -0.93850200 |
| C | -0.00770800 | 2.18255600  | 1.30264800  |
| C | 0.70104300  | 3.77969700  | -0.91272900 |
| N | 1.52507900  | 2.77670600  | -0.51616800 |
| C | 1.20210000  | 1.90989600  | 0.41304400  |
| C | -1.88684000 | 0.59832100  | 0.48056000  |
| C | -2.85052800 | 0.21532300  | -0.39673300 |
| C | 1.98535400  | 0.70129000  | 0.58021400  |
| C | 2.99873900  | 0.35664500  | -0.25608800 |
| C | 5.70966500  | -2.08433600 | -1.14667900 |
| C | 4.85064700  | -0.98917300 | -1.15599700 |
| C | 5.58990600  | -3.04258000 | -0.13052600 |
| C | 3.85861800  | -0.80900600 | -0.17391400 |
| C | 4.60492800  | -2.88274400 | 0.86444000  |
| C | 3.76009600  | -1.78987700 | 0.84158100  |
| O | 6.36555600  | -4.14840400 | -0.01518100 |
| C | 7.38569300  | -4.37155600 | -0.98896000 |
| C | -5.40169300 | -2.34487700 | -1.41530900 |
| C | -4.60115700 | -1.20682800 | -1.37818200 |

|   |             |             |             |
|---|-------------|-------------|-------------|
| C | -5.26054300 | -3.31686700 | -0.41507900 |
| C | -3.64792000 | -0.99629500 | -0.36424300 |
| C | -4.31250500 | -3.12804300 | 0.61022600  |
| C | -3.52577000 | -1.99267700 | 0.63340400  |
| O | -5.98117800 | -4.46282300 | -0.34320400 |
| C | -6.96421700 | -4.71534400 | -1.34749600 |
| C | -1.40525900 | 4.82817300  | -1.58637900 |
| N | -1.99495300 | 5.69986400  | -2.08279500 |
| C | 1.37509100  | 4.89120700  | -1.53579600 |
| N | 1.94223900  | 5.78912900  | -2.01135900 |
| C | -0.00923200 | 1.52596900  | 2.69097900  |
| C | -1.14594900 | 2.03390600  | 3.59006600  |
| C | -1.11439100 | 1.40951700  | 4.98776500  |
| H | -1.62577600 | -0.03904300 | 1.31671800  |
| H | -3.06041100 | 0.89555400  | -1.21977200 |
| H | 1.72947600  | 0.06711000  | 1.42051000  |
| H | 3.19923500  | 1.03234800  | -1.08522800 |
| H | -0.03693600 | 3.27094900  | 1.44816500  |
| H | 6.45865000  | -2.18254300 | -1.92249000 |
| H | 4.94927900  | -0.25073400 | -1.94681600 |
| H | 4.53030100  | -3.63470000 | 1.64287600  |
| H | 3.01299400  | -1.69191600 | 1.62257200  |
| H | 8.12113300  | -3.55949800 | -0.98794000 |
| H | 7.87321700  | -5.30267600 | -0.70070700 |
| H | 6.96080900  | -4.47822500 | -1.99318200 |
| H | -6.12249200 | -2.46520300 | -2.21436500 |
| H | -4.71640600 | -0.45770400 | -2.15660100 |
| H | -4.21990500 | -3.89178100 | 1.37514100  |
| H | -2.80620400 | -1.87340700 | 1.43694900  |
| H | -6.50924500 | -4.78166900 | -2.34195800 |
| H | -7.41317700 | -5.67432000 | -1.08951600 |
| H | -7.73789100 | -3.93959600 | -1.35064500 |
| H | -0.06123900 | 0.43378100  | 2.61990000  |
| H | 0.95222100  | 1.75107900  | 3.16846200  |
| H | -1.07561600 | 3.12612400  | 3.67276100  |
| H | -2.11340400 | 1.82573300  | 3.11637500  |
| H | -1.92878800 | 1.79314300  | 5.60983200  |
| H | -1.21792200 | 0.31963800  | 4.93870100  |
| H | -0.17088000 | 1.63025400  | 5.49924300  |

Table S23.

### TD-DFT output

HOMO: 119, LUMO: 120

STATE # 1 ENERGY = 3.041200 EV

OSCILLATOR STRENGTH = 1.230000

| OCC | VIR | EXCITATION |  | DE-EXCITATION |  |
|-----|-----|------------|--|---------------|--|
|     |     | AMPLITUDE  |  | AMPLITUDE     |  |
| I   | A   | X(I->A)    |  | Y(A->I)       |  |
| --- | --- | -----      |  | -----         |  |
| 118 | 121 | -0.170800  |  | 0.000000      |  |
| 119 | 120 | 0.664640   |  | 0.000000      |  |



STATE # 2 ENERGY = 3.764500 EV  
 OSCILLATOR STRENGTH = 0.342100

| OCC | VIR | EXCITATION<br>AMPLITUDE | DE-EXCITATION<br>AMPLITUDE |
|-----|-----|-------------------------|----------------------------|
| I   | A   | X(I->A)                 | Y(A->I)                    |
| --- | --- | -----                   | -----                      |
| 117 | 121 | -0.206500               | 0.000000                   |
| 118 | 120 | 0.178710                | 0.000000                   |
| 119 | 121 | 0.617200                | 0.000000                   |

STATE # 3 ENERGY = 3.879200 EV  
 OSCILLATOR STRENGTH = 1.328500

| OCC | VIR | EXCITATION<br>AMPLITUDE | DE-EXCITATION<br>AMPLITUDE |
|-----|-----|-------------------------|----------------------------|
| I   | A   | X(I->A)                 | Y(A->I)                    |
| --- | --- | -----                   | -----                      |
| 113 | 120 | -0.120980               | 0.000000                   |
| 118 | 120 | 0.644350                | 0.000000                   |
| 119 | 121 | -0.211440               | 0.000000                   |

STATE # 4 ENERGY = 4.243200 EV  
 OSCILLATOR STRENGTH = 0.000200

| OCC | VIR | EXCITATION<br>AMPLITUDE | DE-EXCITATION<br>AMPLITUDE |
|-----|-----|-------------------------|----------------------------|
| I   | A   | X(I->A)                 | Y(A->I)                    |
| --- | --- | -----                   | -----                      |
| 111 | 120 | 0.101970                | 0.000000                   |
| 112 | 121 | -0.191420               | 0.000000                   |
| 114 | 120 | 0.445590                | 0.000000                   |
| 117 | 120 | 0.447660                | 0.000000                   |
| 119 | 122 | -0.100690               | 0.000000                   |

STATE # 5 ENERGY = 4.421300 EV  
 OSCILLATOR STRENGTH = 0.192900

| OCC | VIR | EXCITATION<br>AMPLITUDE | DE-EXCITATION<br>AMPLITUDE |
|-----|-----|-------------------------|----------------------------|
| I   | A   | X(I->A)                 | Y(A->I)                    |
| --- | --- | -----                   | -----                      |
| 112 | 121 | 0.118100                | 0.000000                   |
| 114 | 120 | 0.137990                | 0.000000                   |
| 117 | 122 | -0.101380               | 0.000000                   |
| 118 | 121 | 0.625360                | 0.000000                   |
| 119 | 120 | 0.167100                | 0.000000                   |

STATE # 6 ENERGY = 4.656300 EV  
 OSCILLATOR STRENGTH = 0.042500

| OCC | VIR | EXCITATION<br>AMPLITUDE | DE-EXCITATION<br>AMPLITUDE |
|-----|-----|-------------------------|----------------------------|
| I   | A   | X(I->A)                 | Y(A->I)                    |
| --- | --- | -----                   | -----                      |
| 111 | 121 | -0.104040               | 0.000000                   |
| 112 | 120 | 0.417240                | 0.000000                   |

|     |     |           |          |
|-----|-----|-----------|----------|
| 114 | 121 | -0.353070 | 0.000000 |
| 117 | 121 | -0.307210 | 0.000000 |
| 119 | 121 | -0.168660 | 0.000000 |

STATE # 7 ENERGY = 4.820000 EV  
 OSCILLATOR STRENGTH = 0.001000

| OCC | VIR | EXCITATION<br>AMPLITUDE | DE-EXCITATION<br>AMPLITUDE |
|-----|-----|-------------------------|----------------------------|
| I   | A   | X(I->A)                 | Y(A->I)                    |
| --- | --- | -----                   | -----                      |
| 115 | 120 | 0.350220                | 0.000000                   |
| 115 | 121 | -0.120710               | 0.000000                   |
| 115 | 122 | 0.146140                | 0.000000                   |
| 116 | 120 | -0.205530               | 0.000000                   |
| 116 | 121 | 0.283540                | 0.000000                   |
| 117 | 124 | -0.102610               | 0.000000                   |
| 118 | 123 | -0.227900               | 0.000000                   |
| 118 | 124 | -0.136250               | 0.000000                   |
| 119 | 123 | -0.113630               | 0.000000                   |
| 119 | 124 | -0.261700               | 0.000000                   |

STATE # 8 ENERGY = 4.821300 EV  
 OSCILLATOR STRENGTH = 0.000400

| OCC | VIR | EXCITATION<br>AMPLITUDE | DE-EXCITATION<br>AMPLITUDE |
|-----|-----|-------------------------|----------------------------|
| I   | A   | X(I->A)                 | Y(A->I)                    |
| --- | --- | -----                   | -----                      |
| 115 | 120 | 0.205650                | 0.000000                   |
| 115 | 121 | 0.279030                | 0.000000                   |
| 116 | 120 | 0.349590                | 0.000000                   |
| 116 | 121 | 0.131110                | 0.000000                   |
| 116 | 122 | 0.142790                | 0.000000                   |
| 117 | 123 | 0.100650                | 0.000000                   |
| 118 | 123 | -0.140330               | 0.000000                   |
| 118 | 124 | 0.226670                | 0.000000                   |
| 119 | 123 | 0.262140                | 0.000000                   |
| 119 | 124 | -0.112640               | 0.000000                   |

STATE # 9 ENERGY = 4.894300 EV  
 OSCILLATOR STRENGTH = 0.116700

| OCC | VIR | EXCITATION<br>AMPLITUDE | DE-EXCITATION<br>AMPLITUDE |
|-----|-----|-------------------------|----------------------------|
| I   | A   | X(I->A)                 | Y(A->I)                    |
| --- | --- | -----                   | -----                      |
| 112 | 120 | 0.484310                | 0.000000                   |
| 112 | 122 | -0.101830               | 0.000000                   |
| 114 | 121 | 0.167330                | 0.000000                   |
| 117 | 121 | 0.372230                | 0.000000                   |
| 118 | 122 | -0.132150               | 0.000000                   |

STATE # 10 ENERGY = 4.988300 EV  
 OSCILLATOR STRENGTH = 0.001200

| OCC | VIR | EXCITATION<br>AMPLITUDE | DE-EXCITATION<br>AMPLITUDE |
|-----|-----|-------------------------|----------------------------|
| I   | A   | X(I->A)                 | Y(A->I)                    |
| --- | --- | -----                   | -----                      |

| OCC | VIR | AMPLITUDE | AMPLITUDE |
|-----|-----|-----------|-----------|
| I   | A   | X(I->A)   | Y(A->I)   |
| --- | --- | -----     | -----     |
| 117 | 122 | -0.183400 | 0.000000  |
| 119 | 122 | 0.634150  | 0.000000  |

STATE # 11 ENERGY = 5.052000 EV

OSCILLATOR STRENGTH = 0.006400

|     |     | EXCITATION | DE-EXCITATION |
|-----|-----|------------|---------------|
| OCC | VIR | AMPLITUDE  | AMPLITUDE     |
| I   | A   | X(I->A)    | Y(A->I)       |
| --- | --- | -----      | -----         |
| 111 | 120 | -0.227570  | 0.000000      |
| 114 | 120 | -0.405420  | 0.000000      |
| 117 | 120 | 0.473250   | 0.000000      |

STATE # 12 ENERGY = 5.470900 EV

OSCILLATOR STRENGTH = 0.027100

|     |     | EXCITATION | DE-EXCITATION |
|-----|-----|------------|---------------|
| OCC | VIR | AMPLITUDE  | AMPLITUDE     |
| I   | A   | X(I->A)    | Y(A->I)       |
| --- | --- | -----      | -----         |
| 112 | 121 | 0.510550   | 0.000000      |
| 114 | 120 | 0.107740   | 0.000000      |
| 114 | 122 | -0.287050  | 0.000000      |
| 117 | 122 | -0.164680  | 0.000000      |
| 118 | 121 | -0.182460  | 0.000000      |

STATE # 13 ENERGY = 5.605900 EV

OSCILLATOR STRENGTH = 0.035000

|     |     | EXCITATION | DE-EXCITATION |
|-----|-----|------------|---------------|
| OCC | VIR | AMPLITUDE  | AMPLITUDE     |
| I   | A   | X(I->A)    | Y(A->I)       |
| --- | --- | -----      | -----         |
| 107 | 120 | 0.179480   | 0.000000      |
| 111 | 121 | -0.125520  | 0.000000      |
| 113 | 120 | 0.470040   | 0.000000      |
| 116 | 120 | -0.163330  | 0.000000      |
| 118 | 120 | 0.139410   | 0.000000      |
| 118 | 122 | 0.261430   | 0.000000      |
| 119 | 121 | 0.114750   | 0.000000      |
| 119 | 123 | 0.121850   | 0.000000      |
| 119 | 125 | 0.132220   | 0.000000      |

STATE # 14 ENERGY = 5.671200 EV

OSCILLATOR STRENGTH = 0.075000

|     |     | EXCITATION | DE-EXCITATION |
|-----|-----|------------|---------------|
| OCC | VIR | AMPLITUDE  | AMPLITUDE     |
| I   | A   | X(I->A)    | Y(A->I)       |
| --- | --- | -----      | -----         |
| 116 | 120 | 0.411770   | 0.000000      |
| 117 | 121 | 0.125590   | 0.000000      |
| 118 | 122 | 0.310570   | 0.000000      |

|     |     |           |          |
|-----|-----|-----------|----------|
| 118 | 124 | -0.237370 | 0.000000 |
| 119 | 123 | -0.319070 | 0.000000 |

STATE # 15 ENERGY = 5.686200 EV  
 OSCILLATOR STRENGTH = 0.069100

| OCC | VIR | EXCITATION<br>AMPLITUDE | DE-EXCITATION<br>AMPLITUDE |
|-----|-----|-------------------------|----------------------------|
| I   | A   | X(I->A)                 | Y(A->I)                    |
| --- | --- | -----                   | -----                      |
| 115 | 120 | 0.482750                | 0.000000                   |
| 118 | 123 | 0.284610                | 0.000000                   |
| 119 | 124 | 0.366810                | 0.000000                   |

STATE # 16 ENERGY = 5.739500 EV  
 OSCILLATOR STRENGTH = 0.017000

| OCC | VIR | EXCITATION<br>AMPLITUDE | DE-EXCITATION<br>AMPLITUDE |
|-----|-----|-------------------------|----------------------------|
| I   | A   | X(I->A)                 | Y(A->I)                    |
| --- | --- | -----                   | -----                      |
| 111 | 126 | 0.107720                | 0.000000                   |
| 116 | 120 | 0.103160                | 0.000000                   |
| 117 | 125 | -0.191620               | 0.000000                   |
| 117 | 126 | -0.287630               | 0.000000                   |
| 119 | 125 | 0.376760                | 0.000000                   |
| 119 | 126 | 0.419270                | 0.000000                   |

STATE # 17 ENERGY = 5.799400 EV  
 OSCILLATOR STRENGTH = 0.179700

| OCC | VIR | EXCITATION<br>AMPLITUDE | DE-EXCITATION<br>AMPLITUDE |
|-----|-----|-------------------------|----------------------------|
| I   | A   | X(I->A)                 | Y(A->I)                    |
| --- | --- | -----                   | -----                      |
| 113 | 120 | 0.326680                | 0.000000                   |
| 113 | 122 | 0.100820                | 0.000000                   |
| 114 | 121 | 0.359390                | 0.000000                   |
| 116 | 120 | 0.139780                | 0.000000                   |
| 117 | 121 | -0.347240               | 0.000000                   |
| 118 | 122 | -0.195210               | 0.000000                   |

STATE # 18 ENERGY = 5.863800 EV  
 OSCILLATOR STRENGTH = 0.096800

| OCC | VIR | EXCITATION<br>AMPLITUDE | DE-EXCITATION<br>AMPLITUDE |
|-----|-----|-------------------------|----------------------------|
| I   | A   | X(I->A)                 | Y(A->I)                    |
| --- | --- | -----                   | -----                      |
| 107 | 120 | -0.109150               | 0.000000                   |
| 111 | 121 | 0.108460                | 0.000000                   |
| 112 | 120 | 0.148730                | 0.000000                   |
| 113 | 120 | -0.172320               | 0.000000                   |
| 114 | 121 | 0.315110                | 0.000000                   |
| 116 | 120 | -0.113940               | 0.000000                   |
| 117 | 121 | -0.146550               | 0.000000                   |
| 118 | 122 | 0.460650                | 0.000000                   |

119 123 0.110630 0.000000

STATE # 19 ENERGY = 6.130000 EV

OSCILLATOR STRENGTH = 0.007400

| OCC | VIR | EXCITATION | DE-EXCITATION |
|-----|-----|------------|---------------|
|     |     | AMPLITUDE  | AMPLITUDE     |
| I   | A   | X(I->A)    | Y(A->I)       |
| --- | --- | -----      | -----         |
| 111 | 120 | 0.425290   | 0.000000      |
| 112 | 121 | 0.157990   | 0.000000      |
| 113 | 121 | -0.167450  | 0.000000      |
| 115 | 124 | 0.113600   | 0.000000      |
| 116 | 123 | -0.116020  | 0.000000      |
| 117 | 122 | 0.295040   | 0.000000      |
| 119 | 125 | 0.137830   | 0.000000      |
| 119 | 126 | -0.113380  | 0.000000      |
| 119 | 127 | -0.146030  | 0.000000      |

STATE # 20 ENERGY = 6.141800 EV

OSCILLATOR STRENGTH = 0.003700

| OCC | VIR | EXCITATION | DE-EXCITATION |
|-----|-----|------------|---------------|
|     |     | AMPLITUDE  | AMPLITUDE     |
| I   | A   | X(I->A)    | Y(A->I)       |
| --- | --- | -----      | -----         |
| 111 | 120 | -0.185180  | 0.000000      |
| 113 | 120 | -0.137850  | 0.000000      |
| 115 | 121 | -0.176260  | 0.000000      |
| 115 | 123 | -0.106230  | 0.000000      |
| 116 | 120 | 0.111520   | 0.000000      |
| 116 | 124 | 0.114500   | 0.000000      |
| 118 | 127 | 0.159770   | 0.000000      |
| 119 | 123 | 0.120350   | 0.000000      |
| 119 | 125 | 0.380250   | 0.000000      |
| 119 | 126 | -0.318340  | 0.000000      |

STATE # 21 ENERGY = 6.160200 EV

OSCILLATOR STRENGTH = 0.005500

| OCC | VIR | EXCITATION | DE-EXCITATION |
|-----|-----|------------|---------------|
|     |     | AMPLITUDE  | AMPLITUDE     |
| I   | A   | X(I->A)    | Y(A->I)       |
| --- | --- | -----      | -----         |
| 111 | 120 | -0.246770  | 0.000000      |
| 112 | 121 | 0.197760   | 0.000000      |
| 113 | 121 | 0.235050   | 0.000000      |
| 114 | 120 | 0.186110   | 0.000000      |
| 114 | 122 | 0.166470   | 0.000000      |
| 115 | 120 | 0.137050   | 0.000000      |
| 116 | 121 | -0.232840  | 0.000000      |
| 117 | 122 | 0.266470   | 0.000000      |
| 119 | 122 | 0.136530   | 0.000000      |
| 119 | 127 | -0.200630  | 0.000000      |

STATE # 22 ENERGY = 6.218300 EV

OSCILLATOR STRENGTH = 0.065000

| OCC | VIR | EXCITATION | DE-EXCITATION |
|-----|-----|------------|---------------|
|     |     | AMPLITUDE  | AMPLITUDE     |
| I   | A   | X(I->A)    | Y(A->I)       |
| --- | --- | -----      | -----         |
| 111 | 120 | -0.121960  | 0.000000      |
| 115 | 120 | -0.244780  | 0.000000      |
| 115 | 121 | 0.173540   | 0.000000      |
| 116 | 121 | 0.513720   | 0.000000      |
| 117 | 122 | 0.161030   | 0.000000      |
| 119 | 124 | 0.180560   | 0.000000      |

STATE # 23 ENERGY = 6.230400 EV  
 OSCILLATOR STRENGTH = 0.068500

| OCC | VIR | EXCITATION | DE-EXCITATION |
|-----|-----|------------|---------------|
|     |     | AMPLITUDE  | AMPLITUDE     |
| I   | A   | X(I->A)    | Y(A->I)       |
| --- | --- | -----      | -----         |
| 115 | 121 | 0.535010   | 0.000000      |
| 116 | 120 | -0.253180  | 0.000000      |
| 116 | 121 | -0.170670  | 0.000000      |
| 118 | 124 | -0.102800  | 0.000000      |
| 119 | 123 | -0.152380  | 0.000000      |
| 119 | 125 | 0.161560   | 0.000000      |
| 119 | 126 | -0.110260  | 0.000000      |

STATE # 24 ENERGY = 6.408200 EV  
 OSCILLATOR STRENGTH = 0.003700

| OCC | VIR | EXCITATION | DE-EXCITATION |
|-----|-----|------------|---------------|
|     |     | AMPLITUDE  | AMPLITUDE     |
| I   | A   | X(I->A)    | Y(A->I)       |
| --- | --- | -----      | -----         |
| 106 | 120 | -0.125340  | 0.000000      |
| 110 | 120 | 0.122500   | 0.000000      |
| 111 | 120 | 0.182120   | 0.000000      |
| 112 | 121 | 0.132940   | 0.000000      |
| 113 | 121 | 0.250400   | 0.000000      |
| 114 | 122 | 0.146990   | 0.000000      |
| 115 | 124 | -0.129600  | 0.000000      |
| 116 | 123 | 0.130620   | 0.000000      |
| 118 | 125 | 0.278670   | 0.000000      |
| 118 | 126 | -0.125940  | 0.000000      |
| 119 | 127 | 0.339420   | 0.000000      |

STATE # 25 ENERGY = 6.448000 EV  
 OSCILLATOR STRENGTH = 0.008000

| OCC | VIR | EXCITATION | DE-EXCITATION |
|-----|-----|------------|---------------|
|     |     | AMPLITUDE  | AMPLITUDE     |
| I   | A   | X(I->A)    | Y(A->I)       |
| --- | --- | -----      | -----         |
| 104 | 120 | 0.404050   | 0.000000      |
| 104 | 122 | -0.219680  | 0.000000      |
| 107 | 120 | 0.338570   | 0.000000      |

|     |     |           |          |
|-----|-----|-----------|----------|
| 107 | 122 | -0.169950 | 0.000000 |
| 112 | 122 | 0.101190  | 0.000000 |
| 113 | 120 | -0.108170 | 0.000000 |
| 119 | 126 | 0.108640  | 0.000000 |

STATE # 26 ENERGY = 6.490700 EV  
 OSCILLATOR STRENGTH = 0.021500

| OCC | VIR | EXCITATION | DE-EXCITATION |
|-----|-----|------------|---------------|
|     |     | AMPLITUDE  | AMPLITUDE     |
| I   | A   | X(I->A)    | Y(A->I)       |
| --- | --- | -----      | -----         |
| 102 | 120 | 0.112960   | 0.000000      |
| 106 | 120 | -0.148870  | 0.000000      |
| 110 | 120 | 0.160340   | 0.000000      |
| 111 | 120 | 0.141570   | 0.000000      |
| 113 | 121 | 0.366230   | 0.000000      |
| 114 | 120 | -0.115950  | 0.000000      |
| 114 | 122 | -0.106120  | 0.000000      |
| 117 | 122 | -0.258940  | 0.000000      |
| 119 | 127 | -0.306110  | 0.000000      |

STATE # 27 ENERGY = 6.544800 EV  
 OSCILLATOR STRENGTH = 0.002500

| OCC | VIR | EXCITATION | DE-EXCITATION |
|-----|-----|------------|---------------|
|     |     | AMPLITUDE  | AMPLITUDE     |
| I   | A   | X(I->A)    | Y(A->I)       |
| --- | --- | -----      | -----         |
| 100 | 121 | -0.109340  | 0.000000      |
| 101 | 120 | -0.124680  | 0.000000      |
| 102 | 120 | 0.136610   | 0.000000      |
| 103 | 120 | 0.251650   | 0.000000      |
| 106 | 120 | -0.230240  | 0.000000      |
| 109 | 121 | -0.105730  | 0.000000      |
| 110 | 120 | 0.329400   | 0.000000      |
| 113 | 121 | -0.259620  | 0.000000      |
| 118 | 125 | -0.107920  | 0.000000      |

STATE # 28 ENERGY = 6.671600 EV  
 OSCILLATOR STRENGTH = 0.001500

| OCC | VIR | EXCITATION | DE-EXCITATION |
|-----|-----|------------|---------------|
|     |     | AMPLITUDE  | AMPLITUDE     |
| I   | A   | X(I->A)    | Y(A->I)       |
| --- | --- | -----      | -----         |
| 97  | 120 | -0.148240  | 0.000000      |
| 100 | 120 | 0.258840   | 0.000000      |
| 101 | 121 | 0.185910   | 0.000000      |
| 108 | 121 | 0.141670   | 0.000000      |
| 109 | 120 | 0.364770   | 0.000000      |
| 109 | 122 | 0.155680   | 0.000000      |
| 110 | 121 | -0.284320  | 0.000000      |

STATE # 29 ENERGY = 6.730400 EV  
 OSCILLATOR STRENGTH = 0.023200

| OCC<br>I | VIR<br>A | EXCITATION           | DE-EXCITATION        |
|----------|----------|----------------------|----------------------|
|          |          | AMPLITUDE<br>X(I->A) | AMPLITUDE<br>Y(A->I) |
| ---      | ---      | -----                | -----                |
| 98       | 120      | -0.163190            | 0.000000             |
| 99       | 120      | 0.142820             | 0.000000             |
| 102      | 120      | 0.146600             | 0.000000             |
| 106      | 120      | -0.114820            | 0.000000             |
| 110      | 120      | 0.105140             | 0.000000             |
| 111      | 120      | -0.124200            | 0.000000             |
| 111      | 122      | -0.114810            | 0.000000             |
| 113      | 121      | -0.189850            | 0.000000             |
| 114      | 122      | -0.156620            | 0.000000             |
| 117      | 122      | 0.100870             | 0.000000             |
| 117      | 127      | 0.121270             | 0.000000             |
| 117      | 128      | -0.110800            | 0.000000             |
| 118      | 123      | 0.150310             | 0.000000             |
| 118      | 125      | 0.212300             | 0.000000             |
| 119      | 124      | -0.149900            | 0.000000             |
| 119      | 128      | 0.194460             | 0.000000             |

STATE # 30 ENERGY = 6.746600 EV  
 OSCILLATOR STRENGTH = 0.020900

| OCC<br>I | VIR<br>A | EXCITATION           | DE-EXCITATION        |
|----------|----------|----------------------|----------------------|
|          |          | AMPLITUDE<br>X(I->A) | AMPLITUDE<br>Y(A->I) |
| ---      | ---      | -----                | -----                |
| 96       | 120      | 0.101120             | 0.000000             |
| 98       | 120      | 0.110610             | 0.000000             |
| 99       | 120      | -0.108140            | 0.000000             |
| 100      | 121      | 0.164480             | 0.000000             |
| 101      | 120      | 0.184600             | 0.000000             |
| 103      | 120      | 0.105630             | 0.000000             |
| 105      | 120      | 0.113950             | 0.000000             |
| 106      | 120      | -0.183390            | 0.000000             |
| 108      | 120      | 0.310080             | 0.000000             |
| 108      | 122      | 0.102680             | 0.000000             |
| 109      | 121      | 0.293040             | 0.000000             |
| 110      | 120      | -0.156180            | 0.000000             |
| 110      | 122      | -0.120530            | 0.000000             |

**A+A conformer of axial isomer of 6d:**

Table S24.

TOTAL FREE ENERGY IN SOLVENT = -1451.635479 A.U.

|   |            |             |             |
|---|------------|-------------|-------------|
| N | 3.30748300 | 1.14579000  | -0.80081200 |
| C | 2.17851300 | 0.94958100  | -0.16260500 |
| C | 4.31144000 | 0.23559200  | -0.90066400 |
| C | 1.96681100 | -0.22357900 | 0.78931300  |
| C | 4.18889300 | -1.15823000 | -0.87226700 |
| N | 3.04316800 | -1.87531400 | -0.73243600 |
| C | 1.96975500 | -1.45867800 | -0.10451800 |
| C | 1.14038400 | 1.92509200  | -0.42435700 |



|   |             |             |             |
|---|-------------|-------------|-------------|
| C | -0.07804100 | 2.00158700  | 0.17026800  |
| C | 0.78050600  | -2.25974100 | -0.30911400 |
| C | -0.42655100 | -2.09813400 | 0.29137200  |
| C | -2.86360700 | -4.68770600 | -1.01126200 |
| C | -1.70213900 | -3.95511400 | -0.85893400 |
| C | -3.99908200 | -4.39558100 | -0.23015000 |
| C | -1.62080500 | -2.89958300 | 0.07989700  |
| C | -3.94547200 | -3.35261200 | 0.70501800  |
| C | -2.76810300 | -2.62348700 | 0.84604900  |
| O | -5.08496800 | -5.17378600 | -0.45971300 |
| C | -6.27211300 | -4.93079900 | 0.29488900  |
| C | -3.34337100 | 3.84086000  | 0.46035700  |
| C | -2.30416000 | 2.93639300  | 0.65950500  |
| C | -3.21710500 | 4.82437700  | -0.53056100 |
| C | -1.12188400 | 2.97589600  | -0.10230500 |
| C | -2.04377400 | 4.88089600  | -1.30826300 |
| C | -1.02100300 | 3.97615500  | -1.09811000 |
| O | -4.15753100 | 5.75708300  | -0.81863700 |
| C | -5.37312200 | 5.75575600  | -0.07016800 |
| C | 5.58868100  | 0.80738200  | -1.24844100 |
| N | 6.61580400  | 1.29256300  | -1.50042800 |
| C | 5.34459400  | -1.95754700 | -1.19527700 |
| N | 6.26945900  | -2.62429600 | -1.42773600 |
| C | 2.96556800  | -0.29420200 | 1.97066900  |
| C | 2.85190500  | 0.90611100  | 2.92009600  |
| C | 3.80475700  | 0.79753200  | 4.11425300  |
| H | 1.42157700  | 2.65233100  | -1.18018200 |
| H | -0.33373300 | 1.28220100  | 0.94426900  |
| H | 0.92875600  | -3.06654100 | -1.02067300 |
| H | -0.55099000 | -1.30256600 | 1.02192400  |
| H | 0.97742800  | -0.12699900 | 1.23349500  |
| H | -2.92625100 | -5.49589100 | -1.73220600 |
| H | -0.84634600 | -4.20021200 | -1.47893300 |
| H | -4.80333000 | -3.10570300 | 1.31791600  |
| H | -2.73545900 | -1.81754300 | 1.57438600  |
| H | -6.65770400 | -3.92091300 | 0.11600100  |
| H | -7.00032600 | -5.66342800 | -0.05247700 |
| H | -6.09777300 | -5.07087600 | 1.36748300  |
| H | -4.23479000 | 3.77393800  | 1.07146200  |
| H | -2.41090900 | 2.17822200  | 1.43081600  |
| H | -1.96662000 | 5.64678900  | -2.07265100 |
| H | -0.13209600 | 4.04173200  | -1.71646300 |
| H | -5.96748800 | 6.57850100  | -0.46703800 |
| H | -5.91982300 | 4.81519200  | -0.20074100 |
| H | -5.18431100 | 5.92381200  | 0.99591600  |
| H | 2.75078600  | -1.21814300 | 2.52122400  |
| H | 3.99569200  | -0.37960500 | 1.61692600  |
| H | 3.06100900  | 1.83161500  | 2.36968000  |
| H | 1.81807800  | 0.98946700  | 3.28137400  |
| H | 3.60067700  | -0.10278800 | 4.70451900  |
| H | 4.84824200  | 0.74861100  | 3.78442200  |
| H | 3.70544600  | 1.66192700  | 4.77808300  |

Rotational transition state **Ts<sub>2</sub>** of axial isomer of **6d**:

Table S25.

TOTAL FREE ENERGY IN SOLVENT = -1451.620397 A.U.

|   |             |             |             |
|---|-------------|-------------|-------------|
| N | 3.12200300  | 1.02540800  | -1.09674000 |
| C | 2.12904600  | 0.93519800  | -0.24245400 |
| C | 4.17478300  | 0.17022600  | -1.16310900 |
| C | 2.18620900  | 0.00926400  | 0.96793300  |
| C | 4.19040300  | -1.17918300 | -0.80788400 |
| N | 3.11568300  | -1.89488700 | -0.34685200 |
| C | 2.14896500  | -1.38433900 | 0.34177800  |
| C | 0.97935700  | 1.76993000  | -0.52561800 |
| C | -0.13548100 | 1.90004100  | 0.23936500  |
| C | 0.93028200  | -2.21300100 | 0.56039600  |
| C | -0.18562300 | -2.10006600 | -0.17729100 |
| C | -2.84795000 | -4.50406100 | 1.07615600  |
| C | -1.64699400 | -3.82222700 | 0.97789000  |
| C | -3.89176900 | -4.24146800 | 0.17054300  |
| C | -1.43627400 | -2.85208800 | -0.02478000 |
| C | -3.70691000 | -3.28338500 | -0.83274800 |
| C | -2.49028300 | -2.60532900 | -0.91688900 |
| O | -5.02977400 | -4.96510700 | 0.35505300  |
| C | -6.12054500 | -4.74887700 | -0.53660700 |
| C | -3.48826100 | 3.53066500  | 0.69700500  |
| C | -2.35134300 | 2.75151600  | 0.88920400  |
| C | -3.58845300 | 4.32706200  | -0.45261200 |
| C | -1.29096500 | 2.73579200  | -0.03609300 |
| C | -2.53963400 | 4.32581600  | -1.39386600 |
| C | -1.41738700 | 3.54707200  | -1.18886100 |
| O | -4.64170500 | 5.12525800  | -0.75023000 |
| C | -5.74031100 | 5.17700500  | 0.16065300  |
| C | 5.32965600  | 0.71720900  | -1.83618900 |
| N | 6.25857600  | 1.18770100  | -2.35399500 |
| C | 5.35040300  | -1.97329800 | -1.10908300 |
| N | 6.28954900  | -2.62826600 | -1.31749000 |
| C | 3.36412500  | 0.26621100  | 1.93842000  |
| C | 3.26734500  | 1.63066200  | 2.63500400  |
| C | 4.40293600  | 1.85417700  | 3.63804400  |
| H | 1.07631900  | 2.33097000  | -1.45012600 |
| H | -0.20762700 | 1.33321300  | 1.16440700  |
| H | 0.99944400  | -2.92199300 | 1.38465800  |
| H | -0.18870200 | -1.37515800 | -0.99057000 |
| H | 1.26881000  | 0.11969800  | 1.54649800  |
| H | -3.00689300 | -5.25009400 | 1.84791100  |
| H | -0.86111700 | -4.04837000 | 1.69189800  |
| H | -4.49130700 | -3.05981400 | -1.54527400 |
| H | -2.35809500 | -1.86420100 | -1.70077900 |
| H | -5.84474200 | -4.98352000 | -1.57120500 |
| H | -6.91137000 | -5.42525900 | -0.21160800 |
| H | -6.48255500 | -3.71545600 | -0.48377700 |
| H | -4.27971800 | 3.51256800  | 1.43571600  |
| H | -2.28191200 | 2.13726400  | 1.78290600  |
| H | -2.63727100 | 4.94798300  | -2.27712100 |
| H | -0.62706300 | 3.56594600  | -1.93180700 |

|   |             |             |             |
|---|-------------|-------------|-------------|
| H | -6.45576400 | 5.87321700  | -0.27637000 |
| H | -6.21032300 | 4.19377300  | 0.27311200  |
| H | -5.42532800 | 5.54632500  | 1.14279400  |
| H | 3.34456800  | -0.53069400 | 2.69167400  |
| H | 4.32775600  | 0.18571900  | 1.43055100  |
| H | 3.28189100  | 2.42914700  | 1.88294900  |
| H | 2.30077900  | 1.70940600  | 3.15010800  |
| H | 4.39572000  | 1.08926300  | 4.42252100  |
| H | 5.38029700  | 1.81500700  | 3.14482500  |
| H | 4.31339900  | 2.83101500  | 4.12320200  |

**A+B conformer of axial isomer of 6d:**

**Table S26.**

TOTAL FREE ENERGY IN SOLVENT = -1451.636151 A.U.

|   |             |             |             |
|---|-------------|-------------|-------------|
| N | -1.37586100 | 2.89644600  | -1.03277400 |
| C | -1.33617500 | 1.87341000  | -0.21295600 |
| C | -0.44342700 | 3.88411700  | -1.09091700 |
| C | -0.38261900 | 1.81765300  | 0.97540400  |
| C | 0.91453300  | 3.78280100  | -0.76198200 |
| N | 1.56680600  | 2.68111300  | -0.31253400 |
| C | 1.00250300  | 1.70082900  | 0.34678900  |
| C | -2.25727600 | 0.79557500  | -0.51421100 |
| C | -2.43708900 | -0.34583000 | 0.19792000  |
| C | 1.71014900  | 0.44455600  | 0.50643600  |
| C | 2.91287700  | 0.18823600  | -0.07217600 |
| C | 4.13403900  | -3.26900600 | 0.86228400  |
| C | 3.33073400  | -2.14728100 | 0.79800300  |
| C | 5.35951700  | -3.30845700 | 0.16717800  |
| C | 3.71244600  | -1.01571300 | 0.03782800  |
| C | 5.76117700  | -2.20066500 | -0.59267900 |
| C | 4.94066000  | -1.07809500 | -0.64759000 |
| O | 6.07009700  | -4.45472800 | 0.29820200  |
| C | 7.32329200  | -4.56387600 | -0.37789800 |
| C | -4.27928200 | -3.60487700 | 0.54018400  |
| C | -3.42452800 | -2.52970300 | 0.76749000  |
| C | -5.09550500 | -3.60412100 | -0.59934700 |
| C | -3.35141200 | -1.43346600 | -0.11136700 |
| C | -5.03797500 | -2.51792200 | -1.49451400 |
| C | -4.18442100 | -1.45811300 | -1.25478900 |
| O | -5.96476300 | -4.59108900 | -0.92927300 |
| C | -6.07010200 | -5.72450500 | -0.06798800 |
| C | -0.90746700 | 5.09109200  | -1.72814800 |
| N | -1.31079500 | 6.06523800  | -2.22073000 |
| C | 1.78189600  | 4.89157600  | -1.07550900 |
| N | 2.49909600  | 5.78078100  | -1.29674500 |
| C | -0.53845900 | 2.97759800  | 1.98810200  |
| C | -1.89305800 | 2.95908400  | 2.70952100  |
| C | -2.01921400 | 4.08282800  | 3.74243700  |
| H | -2.83565900 | 0.97075000  | -1.41648200 |
| H | -1.85439000 | -0.50005300 | 1.10304300  |
| H | 1.22700300  | -0.30164800 | 1.12901200  |
| H | 3.33496000  | 0.98164500  | -0.68613000 |

|   |             |             |             |
|---|-------------|-------------|-------------|
| H | -0.56501400 | 0.89542000  | 1.52940000  |
| H | 3.84277100  | -4.13658600 | 1.44487500  |
| H | 2.39342100  | -2.14452600 | 1.34480100  |
| H | 6.69771100  | -2.20486700 | -1.13610100 |
| H | 5.25804800  | -0.22334300 | -1.23835200 |
| H | 8.02954300  | -3.80113600 | -0.03198000 |
| H | 7.70843800  | -5.55314600 | -0.13154700 |
| H | 7.19809600  | -4.48120300 | -1.46308900 |
| H | -4.30309500 | -4.42656700 | 1.24505100  |
| H | -2.79615500 | -2.53914500 | 1.65416800  |
| H | -5.67578100 | -2.53676500 | -2.37185900 |
| H | -4.16003800 | -0.63793400 | -1.96448600 |
| H | -6.81602200 | -6.37570900 | -0.52329200 |
| H | -5.11629200 | -6.25875900 | 0.00543700  |
| H | -6.40379800 | -5.43346600 | 0.93421600  |
| H | 0.26892900  | 2.87837900  | 2.72378500  |
| H | -0.39851000 | 3.94826800  | 1.50675400  |
| H | -2.70254100 | 3.04649600  | 1.97436100  |
| H | -2.02964200 | 1.98829600  | 3.20450000  |
| H | -1.24127400 | 4.00530600  | 4.51021000  |
| H | -1.92277400 | 5.06674400  | 3.27051700  |
| H | -2.99020800 | 4.04869000  | 4.24620600  |

Rotational transition state **Ts<sub>1</sub>** of axial isomer of **6d**:

Table S27.

TOTAL FREE ENERGY IN SOLVENT = -1451.621427 A.U.

|   |             |             |             |
|---|-------------|-------------|-------------|
| N | -1.21346700 | 2.49330300  | -1.08210500 |
| C | -1.09683900 | 1.53681800  | -0.21954300 |
| C | -0.38219600 | 3.58135400  | -1.14012100 |
| C | -0.17905400 | 1.59967200  | 1.00271200  |
| C | 0.97301700  | 3.58704300  | -0.79792600 |
| N | 1.70013000  | 2.55030600  | -0.31622100 |
| C | 1.20892200  | 1.54965700  | 0.37439800  |
| C | -1.83970000 | 0.26880600  | -0.46736800 |
| C | -3.07577700 | 0.03301800  | -0.00046300 |
| C | 1.99231000  | 0.34359100  | 0.55515000  |
| C | 3.19733100  | 0.14459600  | -0.04230300 |
| C | 4.65169400  | -3.19778900 | 0.96762400  |
| C | 3.77997900  | -2.12953800 | 0.89118600  |
| C | 5.85870700  | -3.18596900 | 0.23932000  |
| C | 4.07203200  | -1.00303800 | 0.08470000  |
| C | 6.17249600  | -2.08116300 | -0.56543900 |
| C | 5.28389300  | -1.01281800 | -0.63229700 |
| O | 6.64031700  | -4.28209200 | 0.38516100  |
| C | 7.87969000  | -4.33927300 | -0.32279600 |
| C | -5.98093800 | -2.35864100 | 0.26172100  |
| C | -5.15502700 | -1.24285900 | 0.40249600  |
| C | -5.54397000 | -3.44450900 | -0.50561800 |
| C | -3.89102000 | -1.17026600 | -0.20139300 |
| C | -4.28109900 | -3.39109700 | -1.12284800 |
| C | -3.47473100 | -2.27572700 | -0.97311600 |
| O | -6.25651800 | -4.58482200 | -0.71663400 |
| C | -7.54831100 | -4.69422900 | -0.12425100 |

|   |             |             |             |
|---|-------------|-------------|-------------|
| C | -0.94545800 | 4.72823400  | -1.79871100 |
| N | -1.42872400 | 5.65739800  | -2.30644100 |
| C | 1.75976200  | 4.75197500  | -1.13059300 |
| N | 2.40907200  | 5.68797500  | -1.36459900 |
| C | -0.41441400 | 2.78120500  | 1.97236400  |
| C | -1.80883000 | 2.76376100  | 2.61292500  |
| C | -1.98759600 | 3.87690700  | 3.64971300  |
| H | -1.30865200 | -0.47103000 | -1.06510200 |
| H | -3.55379000 | 0.81049700  | 0.59442200  |
| H | 1.56638600  | -0.40966900 | 1.21002000  |
| H | 3.55628600  | 0.94283100  | -0.68927300 |
| H | -0.33000800 | 0.67750900  | 1.56906300  |
| H | 4.42982200  | -4.06160800 | 1.58519800  |
| H | 2.85940100  | -2.16490200 | 1.46457900  |
| H | 7.09330900  | -2.04672100 | -1.13398300 |
| H | 5.53272800  | -0.16016600 | -1.25787900 |
| H | 8.54814400  | -3.52600500 | -0.01986100 |
| H | 8.32888100  | -5.29606100 | -0.05761400 |
| H | 7.72072700  | -4.29854100 | -1.40589100 |
| H | -6.94912800 | -2.36906900 | 0.74698800  |
| H | -5.50532300 | -0.40517700 | 0.99991400  |
| H | -3.95917400 | -4.23918500 | -1.71829300 |
| H | -2.50843500 | -2.26255200 | -1.46770000 |
| H | -7.93253100 | -5.67001400 | -0.42217000 |
| H | -7.49305000 | -4.64459200 | 0.96944400  |
| H | -8.22366700 | -3.91155200 | -0.48875500 |
| H | 0.34842400  | 2.70449700  | 2.75665600  |
| H | -0.25472200 | 3.74331400  | 1.48066600  |
| H | -2.57224800 | 2.87052300  | 1.83185600  |
| H | -1.98223000 | 1.78825200  | 3.08611200  |
| H | -1.26127300 | 3.77959400  | 4.46422100  |
| H | -1.84953200 | 4.86507800  | 3.19751500  |
| H | -2.98904400 | 3.84887600  | 4.09008700  |

**B+B conformer of axial isomer of 6d:**

Table S28.

TOTAL FREE ENERGY IN SOLVENT = -1451.637357 A.U.

|   |             |             |             |
|---|-------------|-------------|-------------|
| N | -1.53935600 | 2.33732300  | -0.64906500 |
| C | -1.20077400 | 1.51152700  | 0.30934400  |
| C | -0.75662700 | 3.34290300  | -1.11515700 |
| C | -0.02304100 | 1.77600100  | 1.24322600  |
| C | 0.64432800  | 3.40257300  | -1.09518300 |
| N | 1.49637100  | 2.46894000  | -0.60188100 |
| C | 1.20193400  | 1.61760300  | 0.34840000  |
| C | -1.96164000 | 0.29131900  | 0.50617200  |
| C | -2.97050200 | -0.09966400 | -0.31549000 |
| C | 2.06495000  | 0.47375900  | 0.57970000  |
| C | 3.13597000  | 0.17742200  | -0.20175700 |
| C | 4.90738500  | -2.91316000 | 1.07654600  |
| C | 3.98957700  | -1.88480300 | 0.98477700  |
| C | 5.95179500  | -3.02184000 | 0.13666300  |
| C | 4.07095700  | -0.92037300 | -0.04808700 |

|   |             |             |             |
|---|-------------|-------------|-------------|
| C | 6.05583900  | -2.07863800 | -0.89531200 |
| C | 5.12298900  | -1.04885800 | -0.97455500 |
| O | 6.79675200  | -4.06611400 | 0.31775100  |
| C | 7.87929000  | -4.23607100 | -0.59779900 |
| C | -5.64021800 | -2.61462600 | -1.11813000 |
| C | -4.80238500 | -1.50429200 | -1.16449100 |
| C | -5.49433900 | -3.54214200 | -0.07703100 |
| C | -3.80630900 | -1.27861700 | -0.19570500 |
| C | -4.50466300 | -3.33681600 | 0.90498700  |
| C | -3.68105700 | -2.22941200 | 0.84540200  |
| O | -6.24796400 | -4.65844800 | 0.07513200  |
| C | -7.27132500 | -4.92785400 | -0.88357100 |
| C | -1.47539400 | 4.35486500  | -1.84932100 |
| N | -2.08009800 | 5.17186800  | -2.41597200 |
| C | 1.29519600  | 4.47245100  | -1.80991900 |
| N | 1.84412000  | 5.33832300  | -2.36062500 |
| C | -0.08342200 | 3.10951000  | 2.02412500  |
| C | -1.26983100 | 3.17624500  | 2.99539000  |
| C | -1.28626400 | 4.47343100  | 3.80943900  |
| H | -1.68467400 | -0.31049100 | 1.36594200  |
| H | -3.18754900 | 0.54949600  | -1.16167500 |
| H | 1.81273700  | -0.14962500 | 1.43176300  |
| H | 3.32407900  | 0.84435000  | -1.04102400 |
| H | -0.00000800 | 0.97222900  | 1.98459300  |
| H | 4.84563600  | -3.65276300 | 1.86783100  |
| H | 3.19697700  | -1.82546100 | 1.72357600  |
| H | 6.84896100  | -2.13871600 | -1.62999100 |
| H | 5.20975300  | -0.32174800 | -1.77713800 |
| H | 8.55469400  | -3.37363000 | -0.57980800 |
| H | 8.41549600  | -5.12360400 | -0.26238600 |
| H | 7.51552500  | -4.39413700 | -1.61906800 |
| H | -6.39328800 | -2.74828400 | -1.88460200 |
| H | -4.92116600 | -0.78966100 | -1.97415000 |
| H | -4.40967300 | -4.06576400 | 1.70284600  |
| H | -2.92960300 | -2.09574700 | 1.61679500  |
| H | -7.73818800 | -5.85998600 | -0.56593400 |
| H | -8.02246800 | -4.13044900 | -0.89833300 |
| H | -6.85229500 | -5.05367100 | -1.88800600 |
| H | 0.85456300  | 3.20024600  | 2.58545100  |
| H | -0.12054800 | 3.96646200  | 1.34728400  |
| H | -2.20869600 | 3.08515900  | 2.43535500  |
| H | -1.23188600 | 2.31543700  | 3.67648300  |
| H | -0.37325800 | 4.57897000  | 4.40607800  |
| H | -1.35880700 | 5.34979700  | 3.15606100  |
| H | -2.13838400 | 4.49823900  | 4.49581500  |

Table S29.

**TD-DFT output**

HOMO: 119, LUMO: 120

STATE # 1 ENERGY = 2.920900 EV

OSCILLATOR STRENGTH = 1.294000

|     | EXCITATION | DE-EXCITATION |
|-----|------------|---------------|
| OCC | VIR        | AMPLITUDE     |

| I   | A   | X(I->A)   | Y(A->I)  |
|-----|-----|-----------|----------|
| --- | --- | -----     | -----    |
| 118 | 121 | -0.156290 | 0.000000 |
| 119 | 120 | 0.668650  | 0.000000 |

STATE # 2 ENERGY = 3.705400 EV  
 OSCILLATOR STRENGTH = 0.150600

|     |     | EXCITATION | DE-EXCITATION |
|-----|-----|------------|---------------|
| OCC | VIR | AMPLITUDE  | AMPLITUDE     |
| I   | A   | X(I->A)    | Y(A->I)       |
| --- | --- | -----      | -----         |
| 113 | 120 | 0.114730   | 0.000000      |
| 117 | 121 | -0.221690  | 0.000000      |
| 118 | 120 | 0.260950   | 0.000000      |
| 119 | 121 | 0.577100   | 0.000000      |

STATE # 3 ENERGY = 3.823600 EV  
 OSCILLATOR STRENGTH = 1.410000

|     |     | EXCITATION | DE-EXCITATION |
|-----|-----|------------|---------------|
| OCC | VIR | AMPLITUDE  | AMPLITUDE     |
| I   | A   | X(I->A)    | Y(A->I)       |
| --- | --- | -----      | -----         |
| 113 | 120 | 0.104570   | 0.000000      |
| 118 | 120 | 0.615350   | 0.000000      |
| 119 | 121 | -0.292150  | 0.000000      |

STATE # 4 ENERGY = 4.068500 EV  
 OSCILLATOR STRENGTH = 0.008000

|     |     | EXCITATION | DE-EXCITATION |
|-----|-----|------------|---------------|
| OCC | VIR | AMPLITUDE  | AMPLITUDE     |
| I   | A   | X(I->A)    | Y(A->I)       |
| --- | --- | -----      | -----         |
| 112 | 121 | -0.174460  | 0.000000      |
| 114 | 120 | 0.446380   | 0.000000      |
| 117 | 120 | 0.463210   | 0.000000      |

STATE # 5 ENERGY = 4.450300 EV  
 OSCILLATOR STRENGTH = 0.221100

|     |     | EXCITATION | DE-EXCITATION |
|-----|-----|------------|---------------|
| OCC | VIR | AMPLITUDE  | AMPLITUDE     |
| I   | A   | X(I->A)    | Y(A->I)       |
| --- | --- | -----      | -----         |
| 112 | 121 | 0.106040   | 0.000000      |
| 113 | 121 | 0.117110   | 0.000000      |
| 114 | 120 | 0.155830   | 0.000000      |
| 117 | 122 | 0.112940   | 0.000000      |
| 118 | 121 | 0.618650   | 0.000000      |
| 119 | 120 | 0.148370   | 0.000000      |

STATE # 6 ENERGY = 4.568900 EV  
 OSCILLATOR STRENGTH = 0.022800

|     |     | EXCITATION | DE-EXCITATION |
|-----|-----|------------|---------------|
| OCC | VIR | AMPLITUDE  | AMPLITUDE     |

| I   | A   | X(I->A)   | Y(A->I)  |
|-----|-----|-----------|----------|
| --- | --- | -----     | -----    |
| 111 | 121 | -0.101560 | 0.000000 |
| 112 | 120 | 0.505250  | 0.000000 |
| 114 | 121 | -0.311440 | 0.000000 |
| 117 | 121 | -0.228620 | 0.000000 |
| 119 | 121 | -0.174190 | 0.000000 |

STATE # 7 ENERGY = 4.788900 EV  
 OSCILLATOR STRENGTH = 0.029000

|     |     | EXCITATION | DE-EXCITATION |
|-----|-----|------------|---------------|
| OCC | VIR | AMPLITUDE  | AMPLITUDE     |
| I   | A   | X(I->A)    | Y(A->I)       |
| --- | --- | -----      | -----         |
| 112 | 120 | 0.223630   | 0.000000      |
| 114 | 121 | 0.119460   | 0.000000      |
| 115 | 121 | 0.213850   | 0.000000      |
| 116 | 120 | 0.358880   | 0.000000      |
| 116 | 121 | -0.100400  | 0.000000      |
| 116 | 122 | -0.133760  | 0.000000      |
| 117 | 121 | 0.242010   | 0.000000      |
| 118 | 124 | 0.220010   | 0.000000      |
| 119 | 123 | 0.236530   | 0.000000      |

STATE # 8 ENERGY = 4.794000 EV  
 OSCILLATOR STRENGTH = 0.001300

|     |     | EXCITATION | DE-EXCITATION |
|-----|-----|------------|---------------|
| OCC | VIR | AMPLITUDE  | AMPLITUDE     |
| I   | A   | X(I->A)    | Y(A->I)       |
| --- | --- | -----      | -----         |
| 115 | 120 | 0.421580   | 0.000000      |
| 115 | 121 | 0.134650   | 0.000000      |
| 115 | 122 | -0.159810  | 0.000000      |
| 116 | 121 | 0.268040   | 0.000000      |
| 117 | 120 | 0.104130   | 0.000000      |
| 117 | 124 | -0.108910  | 0.000000      |
| 118 | 123 | -0.253200  | 0.000000      |
| 119 | 124 | -0.258930  | 0.000000      |

STATE # 9 ENERGY = 4.821800 EV  
 OSCILLATOR STRENGTH = 0.117100

|     |     | EXCITATION | DE-EXCITATION |
|-----|-----|------------|---------------|
| OCC | VIR | AMPLITUDE  | AMPLITUDE     |
| I   | A   | X(I->A)    | Y(A->I)       |
| --- | --- | -----      | -----         |
| 112 | 120 | 0.332250   | 0.000000      |
| 114 | 121 | 0.188870   | 0.000000      |
| 115 | 121 | -0.172780  | 0.000000      |
| 116 | 120 | -0.240740  | 0.000000      |
| 117 | 121 | 0.354950   | 0.000000      |
| 118 | 122 | 0.111300   | 0.000000      |
| 118 | 124 | -0.134470  | 0.000000      |
| 119 | 121 | 0.107940   | 0.000000      |



```

119      123  -0.123050      0.000000

STATE # 10  ENERGY =      4.889800 EV
OSCILLATOR STRENGTH =      0.007200
          EXCITATION  DE-EXCITATION
OCC      VIR  AMPLITUDE  AMPLITUDE
I        A    X(I->A)    Y(A->I)
----      -
111      120  -0.249170      0.000000
112      120   0.100020      0.000000
114      120  -0.392380      0.000000
117      120   0.443640      0.000000
119      122   0.117130      0.000000

STATE # 11  ENERGY =      4.953500 EV
OSCILLATOR STRENGTH =      0.003100
          EXCITATION  DE-EXCITATION
OCC      VIR  AMPLITUDE  AMPLITUDE
I        A    X(I->A)    Y(A->I)
----      -
117      120  -0.114550      0.000000
117      122  -0.183960      0.000000
119      122   0.629000      0.000000

STATE # 12  ENERGY =      5.447200 EV
OSCILLATOR STRENGTH =      0.018800
          EXCITATION  DE-EXCITATION
OCC      VIR  AMPLITUDE  AMPLITUDE
I        A    X(I->A)    Y(A->I)
----      -
112      121   0.498420      0.000000
112      125  -0.101340      0.000000
113      121   0.135760      0.000000
114      120   0.108510      0.000000
114      122   0.279910      0.000000
117      122   0.147330      0.000000
118      121  -0.202100      0.000000

STATE # 13  ENERGY =      5.564000 EV
OSCILLATOR STRENGTH =      0.057500
          EXCITATION  DE-EXCITATION
OCC      VIR  AMPLITUDE  AMPLITUDE
I        A    X(I->A)    Y(A->I)
----      -
107      120   0.138040      0.000000
111      121   0.137240      0.000000
113      120   0.473950      0.000000
116      120   0.225140      0.000000
118      120  -0.141520      0.000000
118      122   0.109220      0.000000
118      124  -0.125160      0.000000
119      123  -0.180300      0.000000
119      125  -0.154600      0.000000

```

STATE # 14 ENERGY = 5.633200 EV  
 OSCILLATOR STRENGTH = 0.060700

| OCC | VIR | EXCITATION | DE-EXCITATION |
|-----|-----|------------|---------------|
|     |     | AMPLITUDE  | AMPLITUDE     |
| I   | A   | X(I->A)    | Y(A->I)       |
| --- | --- | -----      | -----         |
| 115 | 120 | 0.454400   | 0.000000      |
| 116 | 120 | -0.145130  | 0.000000      |
| 117 | 124 | 0.105380   | 0.000000      |
| 118 | 123 | 0.284240   | 0.000000      |
| 119 | 124 | 0.366500   | 0.000000      |

STATE # 15 ENERGY = 5.639100 EV  
 OSCILLATOR STRENGTH = 0.062900

| OCC | VIR | EXCITATION | DE-EXCITATION |
|-----|-----|------------|---------------|
|     |     | AMPLITUDE  | AMPLITUDE     |
| I   | A   | X(I->A)    | Y(A->I)       |
| --- | --- | -----      | -----         |
| 113 | 120 | -0.194410  | 0.000000      |
| 115 | 120 | 0.116130   | 0.000000      |
| 116 | 120 | 0.380340   | 0.000000      |
| 117 | 121 | 0.122780   | 0.000000      |
| 118 | 122 | -0.244040  | 0.000000      |
| 118 | 124 | -0.236540  | 0.000000      |
| 119 | 123 | -0.308770  | 0.000000      |

STATE # 16 ENERGY = 5.657400 EV  
 OSCILLATOR STRENGTH = 0.003500

| OCC | VIR | EXCITATION | DE-EXCITATION |
|-----|-----|------------|---------------|
|     |     | AMPLITUDE  | AMPLITUDE     |
| I   | A   | X(I->A)    | Y(A->I)       |
| --- | --- | -----      | -----         |
| 111 | 126 | 0.101450   | 0.000000      |
| 113 | 120 | 0.131320   | 0.000000      |
| 117 | 125 | -0.163870  | 0.000000      |
| 117 | 126 | -0.297710  | 0.000000      |
| 119 | 125 | 0.313600   | 0.000000      |
| 119 | 126 | 0.470260   | 0.000000      |

STATE # 17 ENERGY = 5.761600 EV  
 OSCILLATOR STRENGTH = 0.166000

| OCC | VIR | EXCITATION | DE-EXCITATION |
|-----|-----|------------|---------------|
|     |     | AMPLITUDE  | AMPLITUDE     |
| I   | A   | X(I->A)    | Y(A->I)       |
| --- | --- | -----      | -----         |
| 111 | 121 | 0.122970   | 0.000000      |
| 112 | 120 | 0.150610   | 0.000000      |
| 113 | 120 | -0.253350  | 0.000000      |
| 113 | 122 | 0.115830   | 0.000000      |
| 114 | 121 | 0.406720   | 0.000000      |
| 117 | 121 | -0.371480  | 0.000000      |
| 118 | 122 | 0.134910   | 0.000000      |

119 125 0.105970 0.000000

STATE # 18 ENERGY = 5.856800 EV

OSCILLATOR STRENGTH = 0.074000

| OCC | VIR | EXCITATION | DE-EXCITATION |
|-----|-----|------------|---------------|
|     |     | AMPLITUDE  | AMPLITUDE     |
| I   | A   | X(I->A)    | Y(A->I)       |
| --- | --- | -----      | -----         |
| 113 | 120 | -0.149980  | 0.000000      |
| 114 | 121 | -0.242430  | 0.000000      |
| 116 | 120 | 0.101660   | 0.000000      |
| 118 | 122 | 0.560300   | 0.000000      |

STATE # 19 ENERGY = 6.026900 EV

OSCILLATOR STRENGTH = 0.009100

| OCC | VIR | EXCITATION | DE-EXCITATION |
|-----|-----|------------|---------------|
|     |     | AMPLITUDE  | AMPLITUDE     |
| I   | A   | X(I->A)    | Y(A->I)       |
| --- | --- | -----      | -----         |
| 104 | 120 | 0.123160   | 0.000000      |
| 111 | 120 | 0.565440   | 0.000000      |
| 113 | 121 | 0.229310   | 0.000000      |
| 114 | 120 | -0.218650  | 0.000000      |

STATE # 20 ENERGY = 6.108200 EV

OSCILLATOR STRENGTH = 0.005400

| OCC | VIR | EXCITATION | DE-EXCITATION |
|-----|-----|------------|---------------|
|     |     | AMPLITUDE  | AMPLITUDE     |
| I   | A   | X(I->A)    | Y(A->I)       |
| --- | --- | -----      | -----         |
| 113 | 120 | 0.157200   | 0.000000      |
| 115 | 121 | -0.113600  | 0.000000      |
| 115 | 123 | -0.112580  | 0.000000      |
| 116 | 124 | 0.107510   | 0.000000      |
| 118 | 122 | -0.129610  | 0.000000      |
| 118 | 127 | 0.166580   | 0.000000      |
| 119 | 123 | 0.112090   | 0.000000      |
| 119 | 125 | 0.460030   | 0.000000      |
| 119 | 126 | -0.300890  | 0.000000      |

STATE # 21 ENERGY = 6.134500 EV

OSCILLATOR STRENGTH = 0.032000

| OCC | VIR | EXCITATION | DE-EXCITATION |
|-----|-----|------------|---------------|
|     |     | AMPLITUDE  | AMPLITUDE     |
| I   | A   | X(I->A)    | Y(A->I)       |
| --- | --- | -----      | -----         |
| 112 | 121 | -0.247970  | 0.000000      |
| 114 | 120 | -0.107120  | 0.000000      |
| 114 | 122 | 0.154510   | 0.000000      |
| 116 | 121 | 0.110390   | 0.000000      |
| 117 | 122 | 0.435910   | 0.000000      |
| 118 | 125 | 0.153260   | 0.000000      |
| 119 | 122 | 0.151320   | 0.000000      |

119 127 0.260980 0.000000

STATE # 22 ENERGY = 6.227900 EV

OSCILLATOR STRENGTH = 0.065700

| OCC | VIR | EXCITATION<br>AMPLITUDE | DE-EXCITATION<br>AMPLITUDE |
|-----|-----|-------------------------|----------------------------|
| I   | A   | X(I->A)                 | Y(A->I)                    |
| --- | --- | -----                   | -----                      |
| 115 | 120 | -0.228130               | 0.000000                   |
| 115 | 121 | 0.129340                | 0.000000                   |
| 116 | 120 | 0.101320                | 0.000000                   |
| 116 | 121 | 0.566590                | 0.000000                   |
| 117 | 122 | -0.113810               | 0.000000                   |
| 119 | 124 | 0.215590                | 0.000000                   |

STATE # 23 ENERGY = 6.240500 EV

OSCILLATOR STRENGTH = 0.067700

| OCC | VIR | EXCITATION<br>AMPLITUDE | DE-EXCITATION<br>AMPLITUDE |
|-----|-----|-------------------------|----------------------------|
| I   | A   | X(I->A)                 | Y(A->I)                    |
| --- | --- | -----                   | -----                      |
| 115 | 120 | -0.101700               | 0.000000                   |
| 115 | 121 | 0.568020                | 0.000000                   |
| 116 | 120 | -0.225500               | 0.000000                   |
| 116 | 121 | -0.126280               | 0.000000                   |
| 119 | 123 | -0.196650               | 0.000000                   |
| 119 | 125 | 0.125670                | 0.000000                   |

STATE # 24 ENERGY = 6.390000 EV

OSCILLATOR STRENGTH = 0.006900

| OCC | VIR | EXCITATION<br>AMPLITUDE | DE-EXCITATION<br>AMPLITUDE |
|-----|-----|-------------------------|----------------------------|
| I   | A   | X(I->A)                 | Y(A->I)                    |
| --- | --- | -----                   | -----                      |
| 103 | 120 | 0.404920                | 0.000000                   |
| 103 | 122 | 0.209460                | 0.000000                   |
| 106 | 120 | 0.277560                | 0.000000                   |
| 106 | 122 | 0.121800                | 0.000000                   |
| 107 | 120 | -0.219410               | 0.000000                   |
| 107 | 122 | -0.110120               | 0.000000                   |
| 110 | 120 | 0.109330                | 0.000000                   |
| 119 | 126 | 0.102520                | 0.000000                   |

STATE # 25 ENERGY = 6.428400 EV

OSCILLATOR STRENGTH = 0.009400

| OCC | VIR | EXCITATION<br>AMPLITUDE | DE-EXCITATION<br>AMPLITUDE |
|-----|-----|-------------------------|----------------------------|
| I   | A   | X(I->A)                 | Y(A->I)                    |
| --- | --- | -----                   | -----                      |
| 112 | 121 | 0.183620                | 0.000000                   |
| 114 | 122 | -0.187320               | 0.000000                   |
| 115 | 124 | -0.115450               | 0.000000                   |
| 116 | 123 | 0.116900                | 0.000000                   |

|     |     |           |          |
|-----|-----|-----------|----------|
| 117 | 122 | -0.205080 | 0.000000 |
| 118 | 125 | 0.275380  | 0.000000 |
| 118 | 126 | -0.125430 | 0.000000 |
| 119 | 127 | 0.428110  | 0.000000 |

STATE # 26 ENERGY = 6.511200 EV  
 OSCILLATOR STRENGTH = 0.028200

| OCC | VIR | EXCITATION | DE-EXCITATION |
|-----|-----|------------|---------------|
|     |     | AMPLITUDE  | AMPLITUDE     |
| I   | A   | X(I->A)    | Y(A->I)       |
| --- | --- | -----      | -----         |
| 105 | 120 | -0.149950  | 0.000000      |
| 106 | 120 | 0.115940   | 0.000000      |
| 111 | 120 | -0.158450  | 0.000000      |
| 111 | 122 | -0.116470  | 0.000000      |
| 112 | 121 | -0.134200  | 0.000000      |
| 113 | 121 | 0.473560   | 0.000000      |
| 114 | 120 | 0.102910   | 0.000000      |
| 117 | 122 | -0.141010  | 0.000000      |
| 119 | 127 | 0.192980   | 0.000000      |

STATE # 27 ENERGY = 6.612800 EV  
 OSCILLATOR STRENGTH = 0.048200

| OCC | VIR | EXCITATION | DE-EXCITATION |
|-----|-----|------------|---------------|
|     |     | AMPLITUDE  | AMPLITUDE     |
| I   | A   | X(I->A)    | Y(A->I)       |
| --- | --- | -----      | -----         |
| 96  | 120 | 0.113910   | 0.000000      |
| 101 | 121 | 0.106960   | 0.000000      |
| 102 | 120 | 0.101860   | 0.000000      |
| 105 | 120 | 0.371200   | 0.000000      |
| 106 | 120 | -0.234030  | 0.000000      |
| 107 | 120 | -0.151230  | 0.000000      |
| 108 | 120 | 0.125200   | 0.000000      |
| 108 | 121 | 0.134990   | 0.000000      |
| 109 | 120 | 0.225540   | 0.000000      |
| 110 | 120 | 0.115470   | 0.000000      |
| 113 | 121 | 0.158740   | 0.000000      |

STATE # 28 ENERGY = 6.637600 EV  
 OSCILLATOR STRENGTH = 0.003300

| OCC | VIR | EXCITATION | DE-EXCITATION |
|-----|-----|------------|---------------|
|     |     | AMPLITUDE  | AMPLITUDE     |
| I   | A   | X(I->A)    | Y(A->I)       |
| --- | --- | -----      | -----         |
| 99  | 120 | -0.110930  | 0.000000      |
| 101 | 120 | 0.162340   | 0.000000      |
| 101 | 121 | 0.147440   | 0.000000      |
| 102 | 120 | 0.268380   | 0.000000      |
| 102 | 121 | 0.105440   | 0.000000      |
| 105 | 120 | -0.141150  | 0.000000      |
| 106 | 120 | 0.119290   | 0.000000      |
| 108 | 120 | 0.232730   | 0.000000      |

|     |     |           |          |
|-----|-----|-----------|----------|
| 108 | 121 | 0.212740  | 0.000000 |
| 108 | 122 | -0.107370 | 0.000000 |
| 109 | 120 | 0.138990  | 0.000000 |
| 110 | 120 | -0.245170 | 0.000000 |

STATE # 29 ENERGY = 6.645900 EV  
 OSCILLATOR STRENGTH = 0.001100

| OCC | VIR | EXCITATION | DE-EXCITATION |
|-----|-----|------------|---------------|
|     |     | AMPLITUDE  | AMPLITUDE     |
| I   | A   | X(I->A)    | Y(A->I)       |
| --- | --- | -----      | -----         |
| 101 | 120 | 0.242500   | 0.000000      |
| 102 | 120 | -0.188210  | 0.000000      |
| 102 | 121 | 0.188510   | 0.000000      |
| 108 | 120 | 0.266040   | 0.000000      |
| 109 | 120 | -0.260770  | 0.000000      |
| 109 | 121 | 0.269750   | 0.000000      |
| 109 | 122 | 0.106100   | 0.000000      |

STATE # 30 ENERGY = 6.706400 EV  
 OSCILLATOR STRENGTH = 0.006500

| OCC | VIR | EXCITATION | DE-EXCITATION |
|-----|-----|------------|---------------|
|     |     | AMPLITUDE  | AMPLITUDE     |
| I   | A   | X(I->A)    | Y(A->I)       |
| --- | --- | -----      | -----         |
| 99  | 120 | -0.165240  | 0.000000      |
| 100 | 120 | 0.322530   | 0.000000      |
| 100 | 122 | 0.145980   | 0.000000      |
| 102 | 122 | 0.131080   | 0.000000      |
| 106 | 120 | -0.113960  | 0.000000      |
| 109 | 120 | -0.129500  | 0.000000      |
| 110 | 120 | 0.192010   | 0.000000      |
| 113 | 121 | 0.161240   | 0.000000      |
| 114 | 122 | 0.113300   | 0.000000      |
| 117 | 122 | -0.127980  | 0.000000      |
| 118 | 125 | 0.137740   | 0.000000      |
| 119 | 128 | 0.158830   | 0.000000      |

**Inversion transition state Ts of B+B conformer of 6d:**

**Table S30.**

TOTAL FREE ENERGY IN SOLVENT = -1451.602670 A.U.

|   |             |             |             |
|---|-------------|-------------|-------------|
| N | 1.53343600  | 2.11427400  | 0.26884300  |
| C | 1.30594700  | 0.84573900  | 0.45092100  |
| C | 0.67446500  | 3.16479500  | 0.27071800  |
| C | -0.02497800 | 0.16628800  | 0.89291300  |
| C | -0.70760800 | 3.15709700  | 0.18161300  |
| N | -1.56060600 | 2.09895300  | 0.14893300  |
| C | -1.34172500 | 0.84228800  | 0.41114600  |
| C | 2.48559900  | -0.00946400 | 0.33747000  |
| C | 3.68389800  | 0.43530600  | -0.12829400 |
| C | -2.53721000 | -0.00032600 | 0.37105300  |
| C | -3.69724000 | 0.37987000  | -0.22586000 |

|   |              |             |             |
|---|--------------|-------------|-------------|
| C | -6.38148800  | -2.23800700 | 0.30415200  |
| C | -5.16041300  | -1.59571200 | 0.37236400  |
| C | -7.45319500  | -1.65792000 | -0.40354500 |
| C | -4.95199500  | -0.34700100 | -0.26142400 |
| C | -7.27390600  | -0.42181300 | -1.04027800 |
| C | -6.03760700  | 0.21252100  | -0.96219500 |
| O | -8.60640800  | -2.37047200 | -0.40767500 |
| C | -9.73535400  | -1.84003200 | -1.10248500 |
| C | 7.28722600   | -0.30871100 | -0.86945100 |
| C | 6.06376100   | 0.34025000  | -0.73533900 |
| C | 7.39258700   | -1.65827700 | -0.50370800 |
| C | 4.91916500   | -0.31443000 | -0.24009000 |
| C | 6.26062200   | -2.33569200 | -0.00735800 |
| C | 5.05333400   | -1.67729500 | 0.12049900  |
| O | 8.52575800   | -2.39624700 | -0.58901000 |
| C | 9.71166200   | -1.77387900 | -1.08465900 |
| C | 1.35088600   | 4.44094300  | 0.29932400  |
| N | 1.92474000   | 5.45303800  | 0.33264000  |
| C | -1.39059100  | 4.42557700  | 0.07957900  |
| N | -1.96969900  | 5.43229700  | 0.00056300  |
| C | -0.00797500  | -1.36592200 | 0.56668700  |
| C | 0.24292400   | -2.26056600 | 1.78855400  |
| C | 0.29233500   | -3.74940300 | 1.43546200  |
| H | 2.40359200   | -1.03421000 | 0.66991900  |
| H | 3.72868000   | 1.47255100  | -0.45176000 |
| H | -2.49681800  | -0.95324100 | 0.88329600  |
| H | -3.69135200  | 1.33881000  | -0.73885300 |
| H | -0.04412900  | 0.26817200  | 1.99069400  |
| H | -6.54139700  | -3.19441800 | 0.79066300  |
| H | -4.35478300  | -2.06637000 | 0.92644200  |
| H | -8.08066600  | 0.04650500  | -1.59015400 |
| H | -5.90646900  | 1.17079900  | -1.45698400 |
| H | -9.52505600  | -1.72069300 | -2.17110400 |
| H | -10.53509300 | -2.56841700 | -0.96961000 |
| H | -10.04545600 | -0.87736100 | -0.68125200 |
| H | 8.14130300   | 0.23492500  | -1.25356400 |
| H | 5.98931800   | 1.38602400  | -1.02006000 |
| H | 6.36351400   | -3.37987000 | 0.26839300  |
| H | 4.19911000   | -2.22569200 | 0.50375800  |
| H | 10.48219400  | -2.54429800 | -1.06401600 |
| H | 9.57564600   | -1.42146400 | -2.11302800 |
| H | 10.01654800  | -0.93591600 | -0.44827500 |
| H | -0.94746700  | -1.66622400 | 0.10437400  |
| H | 0.73632400   | -1.56893200 | -0.20710000 |
| H | 1.17871100   | -1.96759900 | 2.28301700  |
| H | -0.54932700  | -2.08203500 | 2.52823400  |
| H | -0.64503100  | -4.07852300 | 0.97316900  |
| H | 1.10113200   | -3.96307700 | 0.72752700  |
| H | 0.45832200   | -4.36295700 | 2.32627600  |

Inversion transition state **Ts** of B+A conformer of **6d**:

Table S31.

TOTAL FREE ENERGY IN SOLVENT = -1451.596353 A.U.

|   |              |             |             |
|---|--------------|-------------|-------------|
| N | 1.32359600   | 2.60993600  | -0.53452800 |
| C | 1.34510200   | 1.32950100  | -0.28287400 |
| C | 0.39830900   | 3.54924400  | -0.18570400 |
| C | 0.24309600   | 0.42841400  | 0.33624900  |
| C | -0.87870000  | 3.36178300  | 0.31770100  |
| N | -1.59461400  | 2.21454000  | 0.35420700  |
| C | -1.21445700  | 0.97567800  | 0.23364100  |
| C | 2.68088900   | 0.78769400  | -0.55324700 |
| C | 3.31779400   | -0.20714300 | 0.11468900  |
| C | -2.30258300  | 0.01227500  | 0.10705300  |
| C | -3.61447200  | 0.37855300  | 0.07776300  |
| C | -5.83036800  | -2.66765600 | -0.28459500 |
| C | -4.69020200  | -1.89557600 | -0.18429400 |
| C | -7.10472100  | -2.06596300 | -0.24103800 |
| C | -4.76776000  | -0.48895100 | -0.03485300 |
| C | -7.21022400  | -0.67482600 | -0.09655600 |
| C | -6.05230500  | 0.08924600  | 0.00295900  |
| O | -8.15522200  | -2.91337600 | -0.34785200 |
| C | -9.47760600  | -2.37387400 | -0.31481500 |
| C | 6.54772300   | -2.03796300 | 0.72054900  |
| C | 5.22538600   | -1.60892500 | 0.80312800  |
| C | 7.40277300   | -1.45116100 | -0.22197800 |
| C | 4.71310200   | -0.59832600 | -0.03065600 |
| C | 6.91163300   | -0.43839100 | -1.06852000 |
| C | 5.59709500   | -0.02222600 | -0.97290000 |
| O | 8.70629600   | -1.78428700 | -0.39886900 |
| C | 9.26817800   | -2.80198700 | 0.42863500  |
| C | 0.86744300   | 4.89855100  | -0.38167600 |
| N | 1.26981600   | 5.97872700  | -0.54593800 |
| C | -1.62910300  | 4.51773200  | 0.75016400  |
| N | -2.25109100  | 5.42889100  | 1.12045400  |
| C | 0.33222400   | -1.04024800 | -0.19964300 |
| C | 0.17322000   | -2.11751900 | 0.88409800  |
| C | 0.20214200   | -3.53770500 | 0.31210300  |
| H | 3.24355300   | 1.41238100  | -1.24006200 |
| H | 2.77426200   | -0.77082700 | 0.86901900  |
| H | -2.05762700  | -1.03636800 | 0.05077600  |
| H | -3.82752900  | 1.44192300  | 0.15728100  |
| H | 0.45605700   | 0.39934300  | 1.41773200  |
| H | -5.77193700  | -3.74473200 | -0.40002300 |
| H | -3.72354400  | -2.38663600 | -0.22548200 |
| H | -8.17667200  | -0.18781500 | -0.06178300 |
| H | -6.14091500  | 1.16619600  | 0.11478600  |
| H | -9.64425300  | -1.68005100 | -1.14596800 |
| H | -10.14840000 | -3.22695300 | -0.41391100 |
| H | -9.67452400  | -1.86302600 | 0.63397600  |
| H | 6.89803300   | -2.81860200 | 1.38431500  |
| H | 4.57055700   | -2.07085300 | 1.53723600  |
| H | 7.58797300   | 0.00338300  | -1.79269200 |
| H | 5.24848300   | 0.75876000  | -1.64041500 |
| H | 10.30760100  | -2.90004000 | 0.11570800  |
| H | 9.23169400   | -2.52052400 | 1.48701400  |
| H | 8.75389900   | -3.75939200 | 0.28801200  |



|   |             |             |             |
|---|-------------|-------------|-------------|
| H | -0.41038300 | -1.18287600 | -0.99013500 |
| H | 1.28569300  | -1.19464800 | -0.69791500 |
| H | 0.98042700  | -2.00303000 | 1.62056900  |
| H | -0.75585700 | -1.96554600 | 1.44736800  |
| H | -0.62085200 | -3.69925200 | -0.39341800 |
| H | 1.13768500  | -3.72914100 | -0.22505500 |
| H | 0.11240000  | -4.28641900 | 1.10516100  |

**Inversion transition state Ts of A+A conformer of 6d:**

**Table S32.**

TOTAL FREE ENERGY IN SOLVENT = -1451.589332 A.U.

|   |             |             |             |
|---|-------------|-------------|-------------|
| N | -1.52741000 | 2.80846600  | 0.17773300  |
| C | -1.30591800 | 1.53686800  | 0.03551500  |
| C | -0.68905300 | 3.85960200  | -0.05919100 |
| C | 0.00000000  | 0.83497900  | -0.44828600 |
| C | 0.68905300  | 3.85960200  | -0.05919200 |
| N | 1.52741000  | 2.80846600  | 0.17773300  |
| C | 1.30591800  | 1.53686800  | 0.03551500  |
| C | -2.53084300 | 0.76807500  | 0.33042200  |
| C | -3.07680800 | -0.21536000 | -0.42210400 |
| C | 2.53084300  | 0.76807500  | 0.33042200  |
| C | 3.07680800  | -0.21536000 | -0.42210400 |
| C | 6.44263200  | -1.20310600 | 1.01980900  |
| C | 5.21767600  | -0.57680600 | 0.88297200  |
| C | 6.88554400  | -2.12266600 | 0.04981000  |
| C | 4.38100600  | -0.84018900 | -0.22545700 |
| C | 6.07392000  | -2.40236900 | -1.05742700 |
| C | 4.84154200  | -1.76401200 | -1.17944800 |
| O | 8.10157500  | -2.68021200 | 0.28047100  |
| C | 8.61063900  | -3.61948600 | -0.66514600 |
| C | -6.07392000 | -2.40236900 | -1.05742700 |
| C | -4.84154100 | -1.76401200 | -1.17944800 |
| C | -6.88554400 | -2.12266600 | 0.04981000  |
| C | -4.38100600 | -0.84018900 | -0.22545700 |
| C | -6.44263200 | -1.20310600 | 1.01980900  |
| C | -5.21767600 | -0.57680600 | 0.88297200  |
| O | -8.10157500 | -2.68021200 | 0.28047100  |
| C | -8.61063900 | -3.61948600 | -0.66514600 |
| C | -1.38571400 | 5.11122100  | -0.23247100 |
| N | -1.97017500 | 6.10537700  | -0.38712200 |
| C | 1.38571400  | 5.11122100  | -0.23247100 |
| N | 1.97017500  | 6.10537700  | -0.38712200 |
| C | 0.00000000  | -0.67241700 | -0.04992700 |
| C | 0.00000000  | -0.95677200 | 1.45879900  |
| C | 0.00000000  | -2.45882100 | 1.75826100  |
| H | -3.12249700 | 1.21579400  | 1.12386300  |
| H | -2.54448200 | -0.56674900 | -1.30249100 |
| H | 3.12249700  | 1.21579400  | 1.12386300  |
| H | 2.54448200  | -0.56674900 | -1.30249100 |
| H | 0.00000000  | 0.89983100  | -1.54788900 |
| H | 7.08300800  | -1.00151600 | 1.87206100  |
| H | 4.90223700  | 0.12290100  | 1.64997000  |
| H | 6.38781600  | -3.10608600 | -1.81834900 |

|   |             |             |             |
|---|-------------|-------------|-------------|
| H | 4.21939800  | -1.98826400 | -2.04190900 |
| H | 8.73605500  | -3.16270200 | -1.65327300 |
| H | 9.58353600  | -3.92898200 | -0.28343100 |
| H | 7.95731600  | -4.49534200 | -0.74879000 |
| H | -6.38781600 | -3.10608600 | -1.81834900 |
| H | -4.21939800 | -1.98826400 | -2.04190900 |
| H | -7.08300800 | -1.00151600 | 1.87206100  |
| H | -4.90223700 | 0.12290100  | 1.64997000  |
| H | -9.58353600 | -3.92898200 | -0.28343200 |
| H | -8.73605500 | -3.16270200 | -1.65327300 |
| H | -7.95731600 | -4.49534200 | -0.74879000 |
| H | -0.86250300 | -1.16059900 | -0.49940200 |
| H | 0.86250300  | -1.16059900 | -0.49940200 |
| H | 0.87748100  | -0.49381100 | 1.92440200  |
| H | -0.87748100 | -0.49381100 | 1.92440200  |
| H | -0.88470500 | -2.94774700 | 1.33481100  |
| H | 0.88470500  | -2.94774700 | 1.33481100  |
| H | 0.00000000  | -2.64710500 | 2.83636900  |

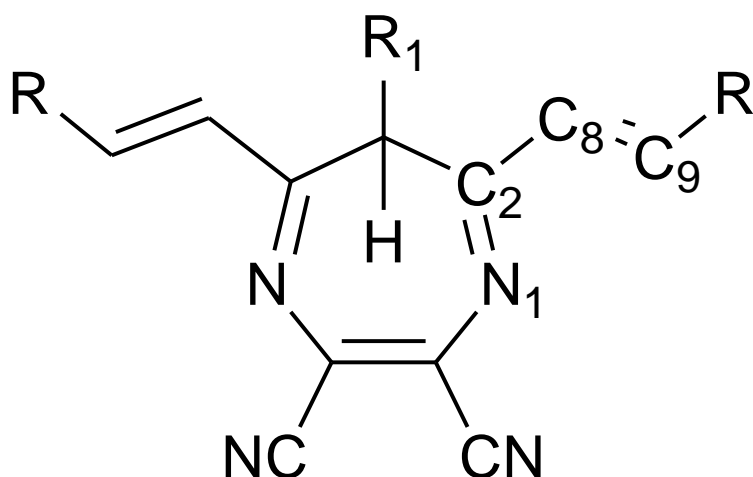

Table S33. Second Order Perturbation Theory Analysis of Fock Matrix in NBO Basis.

|           | Donor NBO (i)      | Acceptor NBO (j)    | E(2)<br>kcal/mol | E(j)-E(i)<br>a.u. | F(i,j)<br>a.u. |
|-----------|--------------------|---------------------|------------------|-------------------|----------------|
| <b>5a</b> | 2. BD (2) N1 - C2  | 435. BD*(2) C8 - C9 | 7.18             | 0.36              | 0.046          |
|           | 18. BD (2) C8 - C9 | 419. BD*(2) N1 - C2 | 20.18            | 0.28              | 0.069          |
| <b>5b</b> | 2. BD (2) N1 - C2  | 493. BD*(2) C8 - C9 | 7.19             | 0.36              | 0.046          |
|           | 18. BD (2) C8 - C9 | 477. BD*(2) N1 - C2 | 20.82            | 0.28              | 0.070          |
| <b>5c</b> | 2. BD (2) N1 - C2  | 707. BD*(2) C8 - C9 | 7.16             | 0.36              | 0.046          |
|           | 18. BD (2) C8 - C9 | 691. BD*(2) N1 - C2 | 21.72            | 0.28              | 0.072          |
| <b>6b</b> | 2. BD (2) N1 - C2  | 559. BD*(2) C8 - C9 | 7.16             | 0.36              | 0.046          |
|           | 18. BD (2) C8 - C9 | 543. BD*(2) N1 - C2 | 20.34            | 0.28              | 0.070          |
| <b>6d</b> | 2. BD (2) N1 - C2  | 581. BD*(2) C8 - C9 | 7.12             | 0.36              | 0.046          |
|           | 18. BD (2) C8 - C9 | 565. BD*(2) N1 - C2 | 21.26            | 0.28              | 0.071          |

Threshold for printing: 0.50 kcal/mol
